# Supplementary material
Source: publisher figshare collection journal article supplement (https://gsajournals.figshare.com/ndownloader/files/29412528)
Supplement: Supplementary file 1 [file 29412528]

#!genome-build CNA3
#!genome-version CNA3
#!genome-date 2015-11
#!genome-build-accession GCA_000149245.3
#!genebuild-last-updated 2015-11
1	ena	gene	100	5645	.	-	.	gene_id "CNAG_04548"; gene_source "ena"; gene_biotype "protein_coding";
1	ena	transcript	100	5645	.	-	.	gene_id "CNAG_04548"; transcript_id "AFR92135"; gene_source "ena"; gene_biotype "protein_coding"; transcript_source "ena"; transcript_biotype "protein_coding";
1	ena	exon	5494	5645	.	-	.	gene_id "CNAG_04548"; transcript_id "AFR92135"; exon_number "1"; gene_source "ena"; gene_biotype "protein_coding"; transcript_source "ena"; transcript_biotype "protein_coding"; exon_id "AFR92135-1";
1	ena	CDS	5494	5645	.	-	0	gene_id "CNAG_04548"; transcript_id "AFR92135"; exon_number "1"; gene_source "ena"; gene_biotype "protein_coding"; transcript_source "ena"; transcript_biotype "protein_coding"; protein_id "AFR92135"; protein_version "1";
1	ena	start_codon	5643	5645	.	-	0	gene_id "CNAG_04548"; transcript_id "AFR92135"; exon_number "1"; gene_source "ena"; gene_biotype "protein_coding"; transcript_source "ena"; transcript_biotype "protein_coding";
1	ena	exon	5322	5422	.	-	.	gene_id "CNAG_04548"; transcript_id "AFR92135"; exon_number "2"; gene_source "ena"; gene_biotype "protein_coding"; transcript_source "ena"; transcript_biotype "protein_coding"; exon_id "AFR92135-2";
1	ena	CDS	5322	5422	.	-	1	gene_id "CNAG_04548"; transcript_id "AFR92135"; exon_number "2"; gene_source "ena"; gene_biotype "protein_coding"; transcript_source "ena"; transcript_biotype "protein_coding"; protein_id "AFR92135"; protein_version "1";
1	ena	exon	3958	5263	.	-	.	gene_id "CNAG_04548"; transcript_id "AFR92135"; exon_number "3"; gene_source "ena"; gene_biotype "protein_coding"; transcript_source "ena"; transcript_biotype "protein_coding"; exon_id "AFR92135-3";
1	ena	CDS	3958	5263	.	-	2	gene_id "CNAG_04548"; transcript_id "AFR92135"; exon_number "3"; gene_source "ena"; gene_biotype "protein_coding"; transcript_source "ena"; transcript_biotype "protein_coding"; protein_id "AFR92135"; protein_version "1";
1	ena	exon	3206	3890	.	-	.	gene_id "CNAG_04548"; transcript_id "AFR92135"; exon_number "4"; gene_source "ena"; gene_biotype "protein_coding"; transcript_source "ena"; transcript_biotype "protein_coding"; exon_id "AFR92135-4";
1	ena	CDS	3206	3890	.	-	1	gene_id "CNAG_04548"; transcript_id "AFR92135"; exon_number "4"; gene_source "ena"; gene_biotype "protein_coding"; transcript_source "ena"; transcript_biotype "protein_coding"; protein_id "AFR92135"; protein_version "1";
1	ena	exon	2846	3126	.	-	.	gene_id "CNAG_04548"; transcript_id "AFR92135"; exon_number "5"; gene_source "ena"; gene_biotype "protein_coding"; transcript_source "ena"; transcript_biotype "protein_coding"; exon_id "AFR92135-5";
1	ena	CDS	2846	3126	.	-	0	gene_id "CNAG_04548"; transcript_id "AFR92135"; exon_number "5"; gene_source "ena"; gene_biotype "protein_coding"; transcript_source "ena"; transcript_biotype "protein_coding"; protein_id "AFR92135"; protein_version "1";
1	ena	exon	2322	2782	.	-	.	gene_id "CNAG_04548"; transcript_id "AFR92135"; exon_number "6"; gene_source "ena"; gene_biotype "protein_coding"; transcript_source "ena"; transcript_biotype "protein_coding"; exon_id "AFR92135-6";
1	ena	CDS	2322	2782	.	-	1	gene_id "CNAG_04548"; transcript_id "AFR92135"; exon_number "6"; gene_source "ena"; gene_biotype "protein_coding"; transcript_source "ena"; transcript_biotype "protein_coding"; protein_id "AFR92135"; protein_version "1";
1	ena	exon	1823	2274	.	-	.	gene_id "CNAG_04548"; transcript_id "AFR92135"; exon_number "7"; gene_source "ena"; gene_biotype "protein_coding"; transcript_source "ena"; transcript_biotype "protein_coding"; exon_id "AFR92135-7";
1	ena	CDS	1823	2274	.	-	2	gene_id "CNAG_04548"; transcript_id "AFR92135"; exon_number "7"; gene_source "ena"; gene_biotype "protein_coding"; transcript_source "ena"; transcript_biotype "protein_coding"; protein_id "AFR92135"; protein_version "1";
1	ena	exon	1556	1767	.	-	.	gene_id "CNAG_04548"; transcript_id "AFR92135"; exon_number "8"; gene_source "ena"; gene_biotype "protein_coding"; transcript_source "ena"; transcript_biotype "protein_coding"; exon_id "AFR92135-8";
1	ena	CDS	1556	1767	.	-	0	gene_id "CNAG_04548"; transcript_id "AFR92135"; exon_number "8"; gene_source "ena"; gene_biotype "protein_coding"; transcript_source "ena"; transcript_biotype "protein_coding"; protein_id "AFR92135"; protein_version "1";
1	ena	exon	100	1497	.	-	.	gene_id "CNAG_04548"; transcript_id "AFR92135"; exon_number "9"; gene_source "ena"; gene_biotype "protein_coding"; transcript_source "ena"; transcript_biotype "protein_coding"; exon_id "AFR92135-9";
1	ena	CDS	168	1497	.	-	1	gene_id "CNAG_04548"; transcript_id "AFR92135"; exon_number "9"; gene_source "ena"; gene_biotype "protein_coding"; transcript_source "ena"; transcript_biotype "protein_coding"; protein_id "AFR92135"; protein_version "1";
1	ena	three_prime_utr	100	167	.	-	.	gene_id "CNAG_04548"; transcript_id "AFR92135"; gene_source "ena"; gene_biotype "protein_coding"; transcript_source "ena"; transcript_biotype "protein_coding";
1	ena	gene	5928	7982	.	-	.	gene_id "CNAG_07303"; gene_source "ena"; gene_biotype "protein_coding";
1	ena	transcript	5928	7982	.	-	.	gene_id "CNAG_07303"; transcript_id "AGV15254"; gene_source "ena"; gene_biotype "protein_coding"; transcript_source "ena"; transcript_biotype "protein_coding";
1	ena	exon	7685	7982	.	-	.	gene_id "CNAG_07303"; transcript_id "AGV15254"; exon_number "1"; gene_source "ena"; gene_biotype "protein_coding"; transcript_source "ena"; transcript_biotype "protein_coding"; exon_id "AGV15254-1";
1	ena	CDS	7685	7769	.	-	0	gene_id "CNAG_07303"; transcript_id "AGV15254"; exon_number "1"; gene_source "ena"; gene_biotype "protein_coding"; transcript_source "ena"; transcript_biotype "protein_coding"; protein_id "AGV15254"; protein_version "1";
1	ena	start_codon	7767	7769	.	-	0	gene_id "CNAG_07303"; transcript_id "AGV15254"; exon_number "1"; gene_source "ena"; gene_biotype "protein_coding"; transcript_source "ena"; transcript_biotype "protein_coding";
1	ena	exon	5928	7626	.	-	.	gene_id "CNAG_07303"; transcript_id "AGV15254"; exon_number "2"; gene_source "ena"; gene_biotype "protein_coding"; transcript_source "ena"; transcript_biotype "protein_coding"; exon_id "AGV15254-2";
1	ena	CDS	6209	7626	.	-	2	gene_id "CNAG_07303"; transcript_id "AGV15254"; exon_number "2"; gene_source "ena"; gene_biotype "protein_coding"; transcript_source "ena"; transcript_biotype "protein_coding"; protein_id "AGV15254"; protein_version "1";
1	ena	five_prime_utr	7770	7982	.	-	.	gene_id "CNAG_07303"; transcript_id "AGV15254"; gene_source "ena"; gene_biotype "protein_coding"; transcript_source "ena"; transcript_biotype "protein_coding";
1	ena	three_prime_utr	5928	6208	.	-	.	gene_id "CNAG_07303"; transcript_id "AGV15254"; gene_source "ena"; gene_biotype "protein_coding"; transcript_source "ena"; transcript_biotype "protein_coding";
1	ena	transcript	6209	7769	.	-	.	gene_id "CNAG_07303"; transcript_id "AFR92136"; gene_source "ena"; gene_biotype "protein_coding"; transcript_source "ena"; transcript_biotype "protein_coding";
1	ena	exon	7685	7769	.	-	.	gene_id "CNAG_07303"; transcript_id "AFR92136"; exon_number "1"; gene_source "ena"; gene_biotype "protein_coding"; transcript_source "ena"; transcript_biotype "protein_coding"; exon_id "AFR92136-1";
1	ena	CDS	7685	7769	.	-	0	gene_id "CNAG_07303"; transcript_id "AFR92136"; exon_number "1"; gene_source "ena"; gene_biotype "protein_coding"; transcript_source "ena"; transcript_biotype "protein_coding"; protein_id "AFR92136"; protein_version "1";
1	ena	start_codon	7767	7769	.	-	0	gene_id "CNAG_07303"; transcript_id "AFR92136"; exon_number "1"; gene_source "ena"; gene_biotype "protein_coding"; transcript_source "ena"; transcript_biotype "protein_coding";
1	ena	exon	6209	7626	.	-	.	gene_id "CNAG_07303"; transcript_id "AFR92136"; exon_number "2"; gene_source "ena"; gene_biotype "protein_coding"; transcript_source "ena"; transcript_biotype "protein_coding"; exon_id "AFR92136-2";
1	ena	CDS	6212	7626	.	-	2	gene_id "CNAG_07303"; transcript_id "AFR92136"; exon_number "2"; gene_source "ena"; gene_biotype "protein_coding"; transcript_source "ena"; transcript_biotype "protein_coding"; protein_id "AFR92136"; protein_version "1";
1	ena	stop_codon	6209	6211	.	-	0	gene_id "CNAG_07303"; transcript_id "AFR92136"; exon_number "2"; gene_source "ena"; gene_biotype "protein_coding"; transcript_source "ena"; transcript_biotype "protein_coding";
1	ena	gene	8766	9603	.	-	.	gene_id "CNAG_07304"; gene_source "ena"; gene_biotype "protein_coding";
1	ena	transcript	8766	9603	.	-	.	gene_id "CNAG_07304"; transcript_id "AFR92137"; gene_source "ena"; gene_biotype "protein_coding"; transcript_source "ena"; transcript_biotype "protein_coding";
1	ena	exon	9311	9603	.	-	.	gene_id "CNAG_07304"; transcript_id "AFR92137"; exon_number "1"; gene_source "ena"; gene_biotype "protein_coding"; transcript_source "ena"; transcript_biotype "protein_coding"; exon_id "AFR92137-1";
1	ena	CDS	9311	9480	.	-	0	gene_id "CNAG_07304"; transcript_id "AFR92137"; exon_number "1"; gene_source "ena"; gene_biotype "protein_coding"; transcript_source "ena"; transcript_biotype "protein_coding"; protein_id "AFR92137"; protein_version "1";
1	ena	start_codon	9478	9480	.	-	0	gene_id "CNAG_07304"; transcript_id "AFR92137"; exon_number "1"; gene_source "ena"; gene_biotype "protein_coding"; transcript_source "ena"; transcript_biotype "protein_coding";
1	ena	exon	8766	9246	.	-	.	gene_id "CNAG_07304"; transcript_id "AFR92137"; exon_number "2"; gene_source "ena"; gene_biotype "protein_coding"; transcript_source "ena"; transcript_biotype "protein_coding"; exon_id "AFR92137-2";
1	ena	CDS	9129	9246	.	-	1	gene_id "CNAG_07304"; transcript_id "AFR92137"; exon_number "2"; gene_source "ena"; gene_biotype "protein_coding"; transcript_source "ena"; transcript_biotype "protein_coding"; protein_id "AFR92137"; protein_version "1";
1	ena	stop_codon	9126	9128	.	-	0	gene_id "CNAG_07304"; transcript_id "AFR92137"; exon_number "2"; gene_source "ena"; gene_biotype "protein_coding"; transcript_source "ena"; transcript_biotype "protein_coding";
1	ena	five_prime_utr	9481	9603	.	-	.	gene_id "CNAG_07304"; transcript_id "AFR92137"; gene_source "ena"; gene_biotype "protein_coding"; transcript_source "ena"; transcript_biotype "protein_coding";
1	ena	three_prime_utr	8766	9125	.	-	.	gene_id "CNAG_07304"; transcript_id "AFR92137"; gene_source "ena"; gene_biotype "protein_coding"; transcript_source "ena"; transcript_biotype "protein_coding";
1	ena	gene	10835	11664	.	-	.	gene_id "CNAG_00001"; gene_source "ena"; gene_biotype "protein_coding";
1	ena	transcript	10835	11664	.	-	.	gene_id "CNAG_00001"; transcript_id "AFR92138"; gene_source "ena"; gene_biotype "protein_coding"; transcript_source "ena"; transcript_biotype "protein_coding";
1	ena	exon	11423	11664	.	-	.	gene_id "CNAG_00001"; transcript_id "AFR92138"; exon_number "1"; gene_source "ena"; gene_biotype "protein_coding"; transcript_source "ena"; transcript_biotype "protein_coding"; exon_id "AFR92138-1";
1	ena	CDS	11423	11501	.	-	0	gene_id "CNAG_00001"; transcript_id "AFR92138"; exon_number "1"; gene_source "ena"; gene_biotype "protein_coding"; transcript_source "ena"; transcript_biotype "protein_coding"; protein_id "AFR92138"; protein_version "1";
1	ena	start_codon	11499	11501	.	-	0	gene_id "CNAG_00001"; transcript_id "AFR92138"; exon_number "1"; gene_source "ena"; gene_biotype "protein_coding"; transcript_source "ena"; transcript_biotype "protein_coding";
1	ena	exon	10835	11307	.	-	.	gene_id "CNAG_00001"; transcript_id "AFR92138"; exon_number "2"; gene_source "ena"; gene_biotype "protein_coding"; transcript_source "ena"; transcript_biotype "protein_coding"; exon_id "AFR92138-2";
1	ena	CDS	11063	11307	.	-	2	gene_id "CNAG_00001"; transcript_id "AFR92138"; exon_number "2"; gene_source "ena"; gene_biotype "protein_coding"; transcript_source "ena"; transcript_biotype "protein_coding"; protein_id "AFR92138"; protein_version "1";
1	ena	stop_codon	11060	11062	.	-	0	gene_id "CNAG_00001"; transcript_id "AFR92138"; exon_number "2"; gene_source "ena"; gene_biotype "protein_coding"; transcript_source "ena"; transcript_biotype "protein_coding";
1	ena	five_prime_utr	11502	11664	.	-	.	gene_id "CNAG_00001"; transcript_id "AFR92138"; gene_source "ena"; gene_biotype "protein_coding"; transcript_source "ena"; transcript_biotype "protein_coding";
1	ena	three_prime_utr	10835	11059	.	-	.	gene_id "CNAG_00001"; transcript_id "AFR92138"; gene_source "ena"; gene_biotype "protein_coding"; transcript_source "ena"; transcript_biotype "protein_coding";
1	ena	gene	11773	12393	.	-	.	gene_id "CNAG_07305"; gene_source "ena"; gene_biotype "protein_coding";
1	ena	transcript	11773	12393	.	-	.	gene_id "CNAG_07305"; transcript_id "AFR92139"; gene_source "ena"; gene_biotype "protein_coding"; transcript_source "ena"; transcript_biotype "protein_coding";
1	ena	exon	11929	12393	.	-	.	gene_id "CNAG_07305"; transcript_id "AFR92139"; exon_number "1"; gene_source "ena"; gene_biotype "protein_coding"; transcript_source "ena"; transcript_biotype "protein_coding"; exon_id "AFR92139-1";
1	ena	CDS	11929	12393	.	-	0	gene_id "CNAG_07305"; transcript_id "AFR92139"; exon_number "1"; gene_source "ena"; gene_biotype "protein_coding"; transcript_source "ena"; transcript_biotype "protein_coding"; protein_id "AFR92139"; protein_version "1";
1	ena	start_codon	12391	12393	.	-	0	gene_id "CNAG_07305"; transcript_id "AFR92139"; exon_number "1"; gene_source "ena"; gene_biotype "protein_coding"; transcript_source "ena"; transcript_biotype "protein_coding";
1	ena	exon	11773	11858	.	-	.	gene_id "CNAG_07305"; transcript_id "AFR92139"; exon_number "2"; gene_source "ena"; gene_biotype "protein_coding"; transcript_source "ena"; transcript_biotype "protein_coding"; exon_id "AFR92139-2";
1	ena	CDS	11838	11858	.	-	0	gene_id "CNAG_07305"; transcript_id "AFR92139"; exon_number "2"; gene_source "ena"; gene_biotype "protein_coding"; transcript_source "ena"; transcript_biotype "protein_coding"; protein_id "AFR92139"; protein_version "1";
1	ena	three_prime_utr	11773	11837	.	-	.	gene_id "CNAG_07305"; transcript_id "AFR92139"; gene_source "ena"; gene_biotype "protein_coding"; transcript_source "ena"; transcript_biotype "protein_coding";
1	ena	gene	12789	13877	.	+	.	gene_id "CNAG_00002"; gene_source "ena"; gene_biotype "protein_coding";
1	ena	transcript	12789	13877	.	+	.	gene_id "CNAG_00002"; transcript_id "AFR92140"; gene_source "ena"; gene_biotype "protein_coding"; transcript_source "ena"; transcript_biotype "protein_coding";
1	ena	exon	12789	12903	.	+	.	gene_id "CNAG_00002"; transcript_id "AFR92140"; exon_number "1"; gene_source "ena"; gene_biotype "protein_coding"; transcript_source "ena"; transcript_biotype "protein_coding"; exon_id "AFR92140-1";
1	ena	CDS	12800	12903	.	+	0	gene_id "CNAG_00002"; transcript_id "AFR92140"; exon_number "1"; gene_source "ena"; gene_biotype "protein_coding"; transcript_source "ena"; transcript_biotype "protein_coding"; protein_id "AFR92140"; protein_version "1";
1	ena	start_codon	12800	12802	.	+	0	gene_id "CNAG_00002"; transcript_id "AFR92140"; exon_number "1"; gene_source "ena"; gene_biotype "protein_coding"; transcript_source "ena"; transcript_biotype "protein_coding";
1	ena	exon	12992	13076	.	+	.	gene_id "CNAG_00002"; transcript_id "AFR92140"; exon_number "2"; gene_source "ena"; gene_biotype "protein_coding"; transcript_source "ena"; transcript_biotype "protein_coding"; exon_id "AFR92140-2";
1	ena	CDS	12992	13076	.	+	1	gene_id "CNAG_00002"; transcript_id "AFR92140"; exon_number "2"; gene_source "ena"; gene_biotype "protein_coding"; transcript_source "ena"; transcript_biotype "protein_coding"; protein_id "AFR92140"; protein_version "1";
1	ena	exon	13137	13255	.	+	.	gene_id "CNAG_00002"; transcript_id "AFR92140"; exon_number "3"; gene_source "ena"; gene_biotype "protein_coding"; transcript_source "ena"; transcript_biotype "protein_coding"; exon_id "AFR92140-3";
1	ena	CDS	13137	13255	.	+	0	gene_id "CNAG_00002"; transcript_id "AFR92140"; exon_number "3"; gene_source "ena"; gene_biotype "protein_coding"; transcript_source "ena"; transcript_biotype "protein_coding"; protein_id "AFR92140"; protein_version "1";
1	ena	exon	13311	13479	.	+	.	gene_id "CNAG_00002"; transcript_id "AFR92140"; exon_number "4"; gene_source "ena"; gene_biotype "protein_coding"; transcript_source "ena"; transcript_biotype "protein_coding"; exon_id "AFR92140-4";
1	ena	CDS	13311	13479	.	+	1	gene_id "CNAG_00002"; transcript_id "AFR92140"; exon_number "4"; gene_source "ena"; gene_biotype "protein_coding"; transcript_source "ena"; transcript_biotype "protein_coding"; protein_id "AFR92140"; protein_version "1";
1	ena	exon	13531	13877	.	+	.	gene_id "CNAG_00002"; transcript_id "AFR92140"; exon_number "5"; gene_source "ena"; gene_biotype "protein_coding"; transcript_source "ena"; transcript_biotype "protein_coding"; exon_id "AFR92140-5";
1	ena	CDS	13531	13578	.	+	0	gene_id "CNAG_00002"; transcript_id "AFR92140"; exon_number "5"; gene_source "ena"; gene_biotype "protein_coding"; transcript_source "ena"; transcript_biotype "protein_coding"; protein_id "AFR92140"; protein_version "1";
1	ena	five_prime_utr	12789	12799	.	+	.	gene_id "CNAG_00002"; transcript_id "AFR92140"; gene_source "ena"; gene_biotype "protein_coding"; transcript_source "ena"; transcript_biotype "protein_coding";
1	ena	three_prime_utr	13579	13877	.	+	.	gene_id "CNAG_00002"; transcript_id "AFR92140"; gene_source "ena"; gene_biotype "protein_coding"; transcript_source "ena"; transcript_biotype "protein_coding";
1	ena	gene	14025	16421	.	-	.	gene_id "CNAG_00003"; gene_source "ena"; gene_biotype "protein_coding";
1	ena	transcript	14025	16421	.	-	.	gene_id "CNAG_00003"; transcript_id "AFR92141"; gene_source "ena"; gene_biotype "protein_coding"; transcript_source "ena"; transcript_biotype "protein_coding";
1	ena	exon	16002	16421	.	-	.	gene_id "CNAG_00003"; transcript_id "AFR92141"; exon_number "1"; gene_source "ena"; gene_biotype "protein_coding"; transcript_source "ena"; transcript_biotype "protein_coding"; exon_id "AFR92141-1";
1	ena	CDS	16002	16370	.	-	0	gene_id "CNAG_00003"; transcript_id "AFR92141"; exon_number "1"; gene_source "ena"; gene_biotype "protein_coding"; transcript_source "ena"; transcript_biotype "protein_coding"; protein_id "AFR92141"; protein_version "1";
1	ena	start_codon	16368	16370	.	-	0	gene_id "CNAG_00003"; transcript_id "AFR92141"; exon_number "1"; gene_source "ena"; gene_biotype "protein_coding"; transcript_source "ena"; transcript_biotype "protein_coding";
1	ena	exon	15835	15947	.	-	.	gene_id "CNAG_00003"; transcript_id "AFR92141"; exon_number "2"; gene_source "ena"; gene_biotype "protein_coding"; transcript_source "ena"; transcript_biotype "protein_coding"; exon_id "AFR92141-2";
1	ena	CDS	15835	15947	.	-	0	gene_id "CNAG_00003"; transcript_id "AFR92141"; exon_number "2"; gene_source "ena"; gene_biotype "protein_coding"; transcript_source "ena"; transcript_biotype "protein_coding"; protein_id "AFR92141"; protein_version "1";
1	ena	exon	15671	15781	.	-	.	gene_id "CNAG_00003"; transcript_id "AFR92141"; exon_number "3"; gene_source "ena"; gene_biotype "protein_coding"; transcript_source "ena"; transcript_biotype "protein_coding"; exon_id "AFR92141-3";
1	ena	CDS	15671	15781	.	-	1	gene_id "CNAG_00003"; transcript_id "AFR92141"; exon_number "3"; gene_source "ena"; gene_biotype "protein_coding"; transcript_source "ena"; transcript_biotype "protein_coding"; protein_id "AFR92141"; protein_version "1";
1	ena	exon	15493	15620	.	-	.	gene_id "CNAG_00003"; transcript_id "AFR92141"; exon_number "4"; gene_source "ena"; gene_biotype "protein_coding"; transcript_source "ena"; transcript_biotype "protein_coding"; exon_id "AFR92141-4";
1	ena	CDS	15493	15620	.	-	1	gene_id "CNAG_00003"; transcript_id "AFR92141"; exon_number "4"; gene_source "ena"; gene_biotype "protein_coding"; transcript_source "ena"; transcript_biotype "protein_coding"; protein_id "AFR92141"; protein_version "1";
1	ena	exon	15242	15436	.	-	.	gene_id "CNAG_00003"; transcript_id "AFR92141"; exon_number "5"; gene_source "ena"; gene_biotype "protein_coding"; transcript_source "ena"; transcript_biotype "protein_coding"; exon_id "AFR92141-5";
1	ena	CDS	15242	15436	.	-	2	gene_id "CNAG_00003"; transcript_id "AFR92141"; exon_number "5"; gene_source "ena"; gene_biotype "protein_coding"; transcript_source "ena"; transcript_biotype "protein_coding"; protein_id "AFR92141"; protein_version "1";
1	ena	exon	15136	15191	.	-	.	gene_id "CNAG_00003"; transcript_id "AFR92141"; exon_number "6"; gene_source "ena"; gene_biotype "protein_coding"; transcript_source "ena"; transcript_biotype "protein_coding"; exon_id "AFR92141-6";
1	ena	CDS	15136	15191	.	-	2	gene_id "CNAG_00003"; transcript_id "AFR92141"; exon_number "6"; gene_source "ena"; gene_biotype "protein_coding"; transcript_source "ena"; transcript_biotype "protein_coding"; protein_id "AFR92141"; protein_version "1";
1	ena	exon	14968	15068	.	-	.	gene_id "CNAG_00003"; transcript_id "AFR92141"; exon_number "7"; gene_source "ena"; gene_biotype "protein_coding"; transcript_source "ena"; transcript_biotype "protein_coding"; exon_id "AFR92141-7";
1	ena	CDS	14968	15068	.	-	0	gene_id "CNAG_00003"; transcript_id "AFR92141"; exon_number "7"; gene_source "ena"; gene_biotype "protein_coding"; transcript_source "ena"; transcript_biotype "protein_coding"; protein_id "AFR92141"; protein_version "1";
1	ena	exon	14846	14899	.	-	.	gene_id "CNAG_00003"; transcript_id "AFR92141"; exon_number "8"; gene_source "ena"; gene_biotype "protein_coding"; transcript_source "ena"; transcript_biotype "protein_coding"; exon_id "AFR92141-8";
1	ena	CDS	14846	14899	.	-	1	gene_id "CNAG_00003"; transcript_id "AFR92141"; exon_number "8"; gene_source "ena"; gene_biotype "protein_coding"; transcript_source "ena"; transcript_biotype "protein_coding"; protein_id "AFR92141"; protein_version "1";
1	ena	exon	14637	14788	.	-	.	gene_id "CNAG_00003"; transcript_id "AFR92141"; exon_number "9"; gene_source "ena"; gene_biotype "protein_coding"; transcript_source "ena"; transcript_biotype "protein_coding"; exon_id "AFR92141-9";
1	ena	CDS	14637	14788	.	-	1	gene_id "CNAG_00003"; transcript_id "AFR92141"; exon_number "9"; gene_source "ena"; gene_biotype "protein_coding"; transcript_source "ena"; transcript_biotype "protein_coding"; protein_id "AFR92141"; protein_version "1";
1	ena	exon	14532	14568	.	-	.	gene_id "CNAG_00003"; transcript_id "AFR92141"; exon_number "10"; gene_source "ena"; gene_biotype "protein_coding"; transcript_source "ena"; transcript_biotype "protein_coding"; exon_id "AFR92141-10";
1	ena	CDS	14532	14568	.	-	2	gene_id "CNAG_00003"; transcript_id "AFR92141"; exon_number "10"; gene_source "ena"; gene_biotype "protein_coding"; transcript_source "ena"; transcript_biotype "protein_coding"; protein_id "AFR92141"; protein_version "1";
1	ena	exon	14366	14465	.	-	.	gene_id "CNAG_00003"; transcript_id "AFR92141"; exon_number "11"; gene_source "ena"; gene_biotype "protein_coding"; transcript_source "ena"; transcript_biotype "protein_coding"; exon_id "AFR92141-11";
1	ena	CDS	14366	14465	.	-	1	gene_id "CNAG_00003"; transcript_id "AFR92141"; exon_number "11"; gene_source "ena"; gene_biotype "protein_coding"; transcript_source "ena"; transcript_biotype "protein_coding"; protein_id "AFR92141"; protein_version "1";
1	ena	exon	14025	14309	.	-	.	gene_id "CNAG_00003"; transcript_id "AFR92141"; exon_number "12"; gene_source "ena"; gene_biotype "protein_coding"; transcript_source "ena"; transcript_biotype "protein_coding"; exon_id "AFR92141-12";
1	ena	CDS	14118	14309	.	-	0	gene_id "CNAG_00003"; transcript_id "AFR92141"; exon_number "12"; gene_source "ena"; gene_biotype "protein_coding"; transcript_source "ena"; transcript_biotype "protein_coding"; protein_id "AFR92141"; protein_version "1";
1	ena	stop_codon	14115	14117	.	-	0	gene_id "CNAG_00003"; transcript_id "AFR92141"; exon_number "12"; gene_source "ena"; gene_biotype "protein_coding"; transcript_source "ena"; transcript_biotype "protein_coding";
1	ena	five_prime_utr	16371	16421	.	-	.	gene_id "CNAG_00003"; transcript_id "AFR92141"; gene_source "ena"; gene_biotype "protein_coding"; transcript_source "ena"; transcript_biotype "protein_coding";
1	ena	three_prime_utr	14025	14114	.	-	.	gene_id "CNAG_00003"; transcript_id "AFR92141"; gene_source "ena"; gene_biotype "protein_coding"; transcript_source "ena"; transcript_biotype "protein_coding";
1	ena	gene	16424	19876	.	-	.	gene_id "CNAG_00004"; gene_source "ena"; gene_biotype "protein_coding";
1	ena	transcript	16424	19876	.	-	.	gene_id "CNAG_00004"; transcript_id "AFR92142"; gene_source "ena"; gene_biotype "protein_coding"; transcript_source "ena"; transcript_biotype "protein_coding";
1	ena	exon	18591	19876	.	-	.	gene_id "CNAG_00004"; transcript_id "AFR92142"; exon_number "1"; gene_source "ena"; gene_biotype "protein_coding"; transcript_source "ena"; transcript_biotype "protein_coding"; exon_id "AFR92142-1";
1	ena	CDS	18591	19388	.	-	0	gene_id "CNAG_00004"; transcript_id "AFR92142"; exon_number "1"; gene_source "ena"; gene_biotype "protein_coding"; transcript_source "ena"; transcript_biotype "protein_coding"; protein_id "AFR92142"; protein_version "1";
1	ena	start_codon	19386	19388	.	-	0	gene_id "CNAG_00004"; transcript_id "AFR92142"; exon_number "1"; gene_source "ena"; gene_biotype "protein_coding"; transcript_source "ena"; transcript_biotype "protein_coding";
1	ena	exon	18401	18529	.	-	.	gene_id "CNAG_00004"; transcript_id "AFR92142"; exon_number "2"; gene_source "ena"; gene_biotype "protein_coding"; transcript_source "ena"; transcript_biotype "protein_coding"; exon_id "AFR92142-2";
1	ena	CDS	18401	18529	.	-	0	gene_id "CNAG_00004"; transcript_id "AFR92142"; exon_number "2"; gene_source "ena"; gene_biotype "protein_coding"; transcript_source "ena"; transcript_biotype "protein_coding"; protein_id "AFR92142"; protein_version "1";
1	ena	exon	18233	18339	.	-	.	gene_id "CNAG_00004"; transcript_id "AFR92142"; exon_number "3"; gene_source "ena"; gene_biotype "protein_coding"; transcript_source "ena"; transcript_biotype "protein_coding"; exon_id "AFR92142-3";
1	ena	CDS	18233	18339	.	-	0	gene_id "CNAG_00004"; transcript_id "AFR92142"; exon_number "3"; gene_source "ena"; gene_biotype "protein_coding"; transcript_source "ena"; transcript_biotype "protein_coding"; protein_id "AFR92142"; protein_version "1";
1	ena	exon	18143	18170	.	-	.	gene_id "CNAG_00004"; transcript_id "AFR92142"; exon_number "4"; gene_source "ena"; gene_biotype "protein_coding"; transcript_source "ena"; transcript_biotype "protein_coding"; exon_id "AFR92142-4";
1	ena	CDS	18143	18170	.	-	1	gene_id "CNAG_00004"; transcript_id "AFR92142"; exon_number "4"; gene_source "ena"; gene_biotype "protein_coding"; transcript_source "ena"; transcript_biotype "protein_coding"; protein_id "AFR92142"; protein_version "1";
1	ena	exon	17799	18084	.	-	.	gene_id "CNAG_00004"; transcript_id "AFR92142"; exon_number "5"; gene_source "ena"; gene_biotype "protein_coding"; transcript_source "ena"; transcript_biotype "protein_coding"; exon_id "AFR92142-5";
1	ena	CDS	17799	18084	.	-	0	gene_id "CNAG_00004"; transcript_id "AFR92142"; exon_number "5"; gene_source "ena"; gene_biotype "protein_coding"; transcript_source "ena"; transcript_biotype "protein_coding"; protein_id "AFR92142"; protein_version "1";
1	ena	exon	17693	17737	.	-	.	gene_id "CNAG_00004"; transcript_id "AFR92142"; exon_number "6"; gene_source "ena"; gene_biotype "protein_coding"; transcript_source "ena"; transcript_biotype "protein_coding"; exon_id "AFR92142-6";
1	ena	CDS	17693	17737	.	-	2	gene_id "CNAG_00004"; transcript_id "AFR92142"; exon_number "6"; gene_source "ena"; gene_biotype "protein_coding"; transcript_source "ena"; transcript_biotype "protein_coding"; protein_id "AFR92142"; protein_version "1";
1	ena	exon	17488	17623	.	-	.	gene_id "CNAG_00004"; transcript_id "AFR92142"; exon_number "7"; gene_source "ena"; gene_biotype "protein_coding"; transcript_source "ena"; transcript_biotype "protein_coding"; exon_id "AFR92142-7";
1	ena	CDS	17488	17623	.	-	2	gene_id "CNAG_00004"; transcript_id "AFR92142"; exon_number "7"; gene_source "ena"; gene_biotype "protein_coding"; transcript_source "ena"; transcript_biotype "protein_coding"; protein_id "AFR92142"; protein_version "1";
1	ena	exon	17268	17433	.	-	.	gene_id "CNAG_00004"; transcript_id "AFR92142"; exon_number "8"; gene_source "ena"; gene_biotype "protein_coding"; transcript_source "ena"; transcript_biotype "protein_coding"; exon_id "AFR92142-8";
1	ena	CDS	17268	17433	.	-	1	gene_id "CNAG_00004"; transcript_id "AFR92142"; exon_number "8"; gene_source "ena"; gene_biotype "protein_coding"; transcript_source "ena"; transcript_biotype "protein_coding"; protein_id "AFR92142"; protein_version "1";
1	ena	exon	17158	17214	.	-	.	gene_id "CNAG_00004"; transcript_id "AFR92142"; exon_number "9"; gene_source "ena"; gene_biotype "protein_coding"; transcript_source "ena"; transcript_biotype "protein_coding"; exon_id "AFR92142-9";
1	ena	CDS	17158	17214	.	-	0	gene_id "CNAG_00004"; transcript_id "AFR92142"; exon_number "9"; gene_source "ena"; gene_biotype "protein_coding"; transcript_source "ena"; transcript_biotype "protein_coding"; protein_id "AFR92142"; protein_version "1";
1	ena	exon	16846	17104	.	-	.	gene_id "CNAG_00004"; transcript_id "AFR92142"; exon_number "10"; gene_source "ena"; gene_biotype "protein_coding"; transcript_source "ena"; transcript_biotype "protein_coding"; exon_id "AFR92142-10";
1	ena	CDS	16846	17104	.	-	0	gene_id "CNAG_00004"; transcript_id "AFR92142"; exon_number "10"; gene_source "ena"; gene_biotype "protein_coding"; transcript_source "ena"; transcript_biotype "protein_coding"; protein_id "AFR92142"; protein_version "1";
1	ena	exon	16424	16788	.	-	.	gene_id "CNAG_00004"; transcript_id "AFR92142"; exon_number "11"; gene_source "ena"; gene_biotype "protein_coding"; transcript_source "ena"; transcript_biotype "protein_coding"; exon_id "AFR92142-11";
1	ena	CDS	16739	16788	.	-	2	gene_id "CNAG_00004"; transcript_id "AFR92142"; exon_number "11"; gene_source "ena"; gene_biotype "protein_coding"; transcript_source "ena"; transcript_biotype "protein_coding"; protein_id "AFR92142"; protein_version "1";
1	ena	stop_codon	16736	16738	.	-	0	gene_id "CNAG_00004"; transcript_id "AFR92142"; exon_number "11"; gene_source "ena"; gene_biotype "protein_coding"; transcript_source "ena"; transcript_biotype "protein_coding";
1	ena	five_prime_utr	19389	19876	.	-	.	gene_id "CNAG_00004"; transcript_id "AFR92142"; gene_source "ena"; gene_biotype "protein_coding"; transcript_source "ena"; transcript_biotype "protein_coding";
1	ena	three_prime_utr	16424	16735	.	-	.	gene_id "CNAG_00004"; transcript_id "AFR92142"; gene_source "ena"; gene_biotype "protein_coding"; transcript_source "ena"; transcript_biotype "protein_coding";
1	ena	gene	20462	22871	.	-	.	gene_id "CNAG_00005"; gene_source "ena"; gene_biotype "protein_coding";
1	ena	transcript	20462	22871	.	-	.	gene_id "CNAG_00005"; transcript_id "AFR92143"; gene_source "ena"; gene_biotype "protein_coding"; transcript_source "ena"; transcript_biotype "protein_coding";
1	ena	exon	20462	22871	.	-	.	gene_id "CNAG_00005"; transcript_id "AFR92143"; exon_number "1"; gene_source "ena"; gene_biotype "protein_coding"; transcript_source "ena"; transcript_biotype "protein_coding"; exon_id "AFR92143-1";
1	ena	CDS	20909	22642	.	-	0	gene_id "CNAG_00005"; transcript_id "AFR92143"; exon_number "1"; gene_source "ena"; gene_biotype "protein_coding"; transcript_source "ena"; transcript_biotype "protein_coding"; protein_id "AFR92143"; protein_version "1";
1	ena	start_codon	22640	22642	.	-	0	gene_id "CNAG_00005"; transcript_id "AFR92143"; exon_number "1"; gene_source "ena"; gene_biotype "protein_coding"; transcript_source "ena"; transcript_biotype "protein_coding";
1	ena	stop_codon	20906	20908	.	-	0	gene_id "CNAG_00005"; transcript_id "AFR92143"; exon_number "1"; gene_source "ena"; gene_biotype "protein_coding"; transcript_source "ena"; transcript_biotype "protein_coding";
1	ena	five_prime_utr	22643	22871	.	-	.	gene_id "CNAG_00005"; transcript_id "AFR92143"; gene_source "ena"; gene_biotype "protein_coding"; transcript_source "ena"; transcript_biotype "protein_coding";
1	ena	three_prime_utr	20462	20905	.	-	.	gene_id "CNAG_00005"; transcript_id "AFR92143"; gene_source "ena"; gene_biotype "protein_coding"; transcript_source "ena"; transcript_biotype "protein_coding";
1	ena	gene	20522	22686	.	+	.	gene_id "CNAG_12000"; gene_name "CNAG_12000"; gene_source "ena"; gene_biotype "ncRNA";
1	ena	transcript	20522	22686	.	+	.	gene_id "CNAG_12000"; transcript_id "CNAG_12000-1"; gene_name "CNAG_12000"; gene_source "ena"; gene_biotype "ncRNA"; transcript_name "CNAG_12000"; transcript_source "ena"; transcript_biotype "ncRNA";
1	ena	exon	20522	21286	.	+	.	gene_id "CNAG_12000"; transcript_id "CNAG_12000-1"; exon_number "1"; gene_name "CNAG_12000"; gene_source "ena"; gene_biotype "ncRNA"; transcript_name "CNAG_12000"; transcript_source "ena"; transcript_biotype "ncRNA"; exon_id "CNAG_12000-1-1";
1	ena	exon	21329	21647	.	+	.	gene_id "CNAG_12000"; transcript_id "CNAG_12000-1"; exon_number "2"; gene_name "CNAG_12000"; gene_source "ena"; gene_biotype "ncRNA"; transcript_name "CNAG_12000"; transcript_source "ena"; transcript_biotype "ncRNA"; exon_id "CNAG_12000-1-2";
1	ena	exon	21715	22686	.	+	.	gene_id "CNAG_12000"; transcript_id "CNAG_12000-1"; exon_number "3"; gene_name "CNAG_12000"; gene_source "ena"; gene_biotype "ncRNA"; transcript_name "CNAG_12000"; transcript_source "ena"; transcript_biotype "ncRNA"; exon_id "CNAG_12000-1-3";
1	ena	gene	23086	24767	.	+	.	gene_id "CNAG_12001"; gene_name "CNAG_12001"; gene_source "ena"; gene_biotype "ncRNA";
1	ena	transcript	23086	24767	.	+	.	gene_id "CNAG_12001"; transcript_id "CNAG_12001-1"; gene_name "CNAG_12001"; gene_source "ena"; gene_biotype "ncRNA"; transcript_name "CNAG_12001"; transcript_source "ena"; transcript_biotype "ncRNA";
1	ena	exon	23086	23660	.	+	.	gene_id "CNAG_12001"; transcript_id "CNAG_12001-1"; exon_number "1"; gene_name "CNAG_12001"; gene_source "ena"; gene_biotype "ncRNA"; transcript_name "CNAG_12001"; transcript_source "ena"; transcript_biotype "ncRNA"; exon_id "CNAG_12001-1-1";
1	ena	exon	23706	23818	.	+	.	gene_id "CNAG_12001"; transcript_id "CNAG_12001-1"; exon_number "2"; gene_name "CNAG_12001"; gene_source "ena"; gene_biotype "ncRNA"; transcript_name "CNAG_12001"; transcript_source "ena"; transcript_biotype "ncRNA"; exon_id "CNAG_12001-1-2";
1	ena	exon	23877	24148	.	+	.	gene_id "CNAG_12001"; transcript_id "CNAG_12001-1"; exon_number "3"; gene_name "CNAG_12001"; gene_source "ena"; gene_biotype "ncRNA"; transcript_name "CNAG_12001"; transcript_source "ena"; transcript_biotype "ncRNA"; exon_id "CNAG_12001-1-3";
1	ena	exon	24206	24402	.	+	.	gene_id "CNAG_12001"; transcript_id "CNAG_12001-1"; exon_number "4"; gene_name "CNAG_12001"; gene_source "ena"; gene_biotype "ncRNA"; transcript_name "CNAG_12001"; transcript_source "ena"; transcript_biotype "ncRNA"; exon_id "CNAG_12001-1-4";
1	ena	exon	24458	24606	.	+	.	gene_id "CNAG_12001"; transcript_id "CNAG_12001-1"; exon_number "5"; gene_name "CNAG_12001"; gene_source "ena"; gene_biotype "ncRNA"; transcript_name "CNAG_12001"; transcript_source "ena"; transcript_biotype "ncRNA"; exon_id "CNAG_12001-1-5";
1	ena	exon	24652	24767	.	+	.	gene_id "CNAG_12001"; transcript_id "CNAG_12001-1"; exon_number "6"; gene_name "CNAG_12001"; gene_source "ena"; gene_biotype "ncRNA"; transcript_name "CNAG_12001"; transcript_source "ena"; transcript_biotype "ncRNA"; exon_id "CNAG_12001-1-6";
1	ena	gene	24546	26154	.	-	.	gene_id "CNAG_00006"; gene_source "ena"; gene_biotype "protein_coding";
1	ena	transcript	24546	26154	.	-	.	gene_id "CNAG_00006"; transcript_id "AFR92144"; gene_source "ena"; gene_biotype "protein_coding"; transcript_source "ena"; transcript_biotype "protein_coding";
1	ena	exon	25904	26154	.	-	.	gene_id "CNAG_00006"; transcript_id "AFR92144"; exon_number "1"; gene_source "ena"; gene_biotype "protein_coding"; transcript_source "ena"; transcript_biotype "protein_coding"; exon_id "AFR92144-1";
1	ena	CDS	25904	26105	.	-	0	gene_id "CNAG_00006"; transcript_id "AFR92144"; exon_number "1"; gene_source "ena"; gene_biotype "protein_coding"; transcript_source "ena"; transcript_biotype "protein_coding"; protein_id "AFR92144"; protein_version "1";
1	ena	start_codon	26103	26105	.	-	0	gene_id "CNAG_00006"; transcript_id "AFR92144"; exon_number "1"; gene_source "ena"; gene_biotype "protein_coding"; transcript_source "ena"; transcript_biotype "protein_coding";
1	ena	exon	25769	25851	.	-	.	gene_id "CNAG_00006"; transcript_id "AFR92144"; exon_number "2"; gene_source "ena"; gene_biotype "protein_coding"; transcript_source "ena"; transcript_biotype "protein_coding"; exon_id "AFR92144-2";
1	ena	CDS	25769	25851	.	-	2	gene_id "CNAG_00006"; transcript_id "AFR92144"; exon_number "2"; gene_source "ena"; gene_biotype "protein_coding"; transcript_source "ena"; transcript_biotype "protein_coding"; protein_id "AFR92144"; protein_version "1";
1	ena	exon	25626	25715	.	-	.	gene_id "CNAG_00006"; transcript_id "AFR92144"; exon_number "3"; gene_source "ena"; gene_biotype "protein_coding"; transcript_source "ena"; transcript_biotype "protein_coding"; exon_id "AFR92144-3";
1	ena	CDS	25626	25715	.	-	0	gene_id "CNAG_00006"; transcript_id "AFR92144"; exon_number "3"; gene_source "ena"; gene_biotype "protein_coding"; transcript_source "ena"; transcript_biotype "protein_coding"; protein_id "AFR92144"; protein_version "1";
1	ena	exon	25438	25493	.	-	.	gene_id "CNAG_00006"; transcript_id "AFR92144"; exon_number "4"; gene_source "ena"; gene_biotype "protein_coding"; transcript_source "ena"; transcript_biotype "protein_coding"; exon_id "AFR92144-4";
1	ena	CDS	25438	25493	.	-	0	gene_id "CNAG_00006"; transcript_id "AFR92144"; exon_number "4"; gene_source "ena"; gene_biotype "protein_coding"; transcript_source "ena"; transcript_biotype "protein_coding"; protein_id "AFR92144"; protein_version "1";
1	ena	exon	24888	25372	.	-	.	gene_id "CNAG_00006"; transcript_id "AFR92144"; exon_number "5"; gene_source "ena"; gene_biotype "protein_coding"; transcript_source "ena"; transcript_biotype "protein_coding"; exon_id "AFR92144-5";
1	ena	CDS	24888	25372	.	-	1	gene_id "CNAG_00006"; transcript_id "AFR92144"; exon_number "5"; gene_source "ena"; gene_biotype "protein_coding"; transcript_source "ena"; transcript_biotype "protein_coding"; protein_id "AFR92144"; protein_version "1";
1	ena	exon	24546	24830	.	-	.	gene_id "CNAG_00006"; transcript_id "AFR92144"; exon_number "6"; gene_source "ena"; gene_biotype "protein_coding"; transcript_source "ena"; transcript_biotype "protein_coding"; exon_id "AFR92144-6";
1	ena	CDS	24790	24830	.	-	2	gene_id "CNAG_00006"; transcript_id "AFR92144"; exon_number "6"; gene_source "ena"; gene_biotype "protein_coding"; transcript_source "ena"; transcript_biotype "protein_coding"; protein_id "AFR92144"; protein_version "1";
1	ena	five_prime_utr	26106	26154	.	-	.	gene_id "CNAG_00006"; transcript_id "AFR92144"; gene_source "ena"; gene_biotype "protein_coding"; transcript_source "ena"; transcript_biotype "protein_coding";
1	ena	three_prime_utr	24546	24789	.	-	.	gene_id "CNAG_00006"; transcript_id "AFR92144"; gene_source "ena"; gene_biotype "protein_coding"; transcript_source "ena"; transcript_biotype "protein_coding";
1	ena	gene	26281	28570	.	+	.	gene_id "CNAG_00007"; gene_source "ena"; gene_biotype "protein_coding";
1	ena	transcript	26281	28570	.	+	.	gene_id "CNAG_00007"; transcript_id "AFR92145"; gene_source "ena"; gene_biotype "protein_coding"; transcript_source "ena"; transcript_biotype "protein_coding";
1	ena	exon	26281	26566	.	+	.	gene_id "CNAG_00007"; transcript_id "AFR92145"; exon_number "1"; gene_source "ena"; gene_biotype "protein_coding"; transcript_source "ena"; transcript_biotype "protein_coding"; exon_id "AFR92145-1";
1	ena	CDS	26374	26566	.	+	0	gene_id "CNAG_00007"; transcript_id "AFR92145"; exon_number "1"; gene_source "ena"; gene_biotype "protein_coding"; transcript_source "ena"; transcript_biotype "protein_coding"; protein_id "AFR92145"; protein_version "1";
1	ena	start_codon	26374	26376	.	+	0	gene_id "CNAG_00007"; transcript_id "AFR92145"; exon_number "1"; gene_source "ena"; gene_biotype "protein_coding"; transcript_source "ena"; transcript_biotype "protein_coding";
1	ena	exon	26624	26817	.	+	.	gene_id "CNAG_00007"; transcript_id "AFR92145"; exon_number "2"; gene_source "ena"; gene_biotype "protein_coding"; transcript_source "ena"; transcript_biotype "protein_coding"; exon_id "AFR92145-2";
1	ena	CDS	26624	26817	.	+	2	gene_id "CNAG_00007"; transcript_id "AFR92145"; exon_number "2"; gene_source "ena"; gene_biotype "protein_coding"; transcript_source "ena"; transcript_biotype "protein_coding"; protein_id "AFR92145"; protein_version "1";
1	ena	exon	26868	26954	.	+	.	gene_id "CNAG_00007"; transcript_id "AFR92145"; exon_number "3"; gene_source "ena"; gene_biotype "protein_coding"; transcript_source "ena"; transcript_biotype "protein_coding"; exon_id "AFR92145-3";
1	ena	CDS	26868	26954	.	+	0	gene_id "CNAG_00007"; transcript_id "AFR92145"; exon_number "3"; gene_source "ena"; gene_biotype "protein_coding"; transcript_source "ena"; transcript_biotype "protein_coding"; protein_id "AFR92145"; protein_version "1";
1	ena	exon	27007	27235	.	+	.	gene_id "CNAG_00007"; transcript_id "AFR92145"; exon_number "4"; gene_source "ena"; gene_biotype "protein_coding"; transcript_source "ena"; transcript_biotype "protein_coding"; exon_id "AFR92145-4";
1	ena	CDS	27007	27235	.	+	0	gene_id "CNAG_00007"; transcript_id "AFR92145"; exon_number "4"; gene_source "ena"; gene_biotype "protein_coding"; transcript_source "ena"; transcript_biotype "protein_coding"; protein_id "AFR92145"; protein_version "1";
1	ena	exon	27283	27535	.	+	.	gene_id "CNAG_00007"; transcript_id "AFR92145"; exon_number "5"; gene_source "ena"; gene_biotype "protein_coding"; transcript_source "ena"; transcript_biotype "protein_coding"; exon_id "AFR92145-5";
1	ena	CDS	27283	27535	.	+	2	gene_id "CNAG_00007"; transcript_id "AFR92145"; exon_number "5"; gene_source "ena"; gene_biotype "protein_coding"; transcript_source "ena"; transcript_biotype "protein_coding"; protein_id "AFR92145"; protein_version "1";
1	ena	exon	27599	28079	.	+	.	gene_id "CNAG_00007"; transcript_id "AFR92145"; exon_number "6"; gene_source "ena"; gene_biotype "protein_coding"; transcript_source "ena"; transcript_biotype "protein_coding"; exon_id "AFR92145-6";
1	ena	CDS	27599	28079	.	+	1	gene_id "CNAG_00007"; transcript_id "AFR92145"; exon_number "6"; gene_source "ena"; gene_biotype "protein_coding"; transcript_source "ena"; transcript_biotype "protein_coding"; protein_id "AFR92145"; protein_version "1";
1	ena	exon	28136	28570	.	+	.	gene_id "CNAG_00007"; transcript_id "AFR92145"; exon_number "7"; gene_source "ena"; gene_biotype "protein_coding"; transcript_source "ena"; transcript_biotype "protein_coding"; exon_id "AFR92145-7";
1	ena	CDS	28136	28444	.	+	0	gene_id "CNAG_00007"; transcript_id "AFR92145"; exon_number "7"; gene_source "ena"; gene_biotype "protein_coding"; transcript_source "ena"; transcript_biotype "protein_coding"; protein_id "AFR92145"; protein_version "1";
1	ena	stop_codon	28445	28447	.	+	0	gene_id "CNAG_00007"; transcript_id "AFR92145"; exon_number "7"; gene_source "ena"; gene_biotype "protein_coding"; transcript_source "ena"; transcript_biotype "protein_coding";
1	ena	five_prime_utr	26281	26373	.	+	.	gene_id "CNAG_00007"; transcript_id "AFR92145"; gene_source "ena"; gene_biotype "protein_coding"; transcript_source "ena"; transcript_biotype "protein_coding";
1	ena	three_prime_utr	28448	28570	.	+	.	gene_id "CNAG_00007"; transcript_id "AFR92145"; gene_source "ena"; gene_biotype "protein_coding"; transcript_source "ena"; transcript_biotype "protein_coding";
1	ena	gene	28550	32907	.	-	.	gene_id "CNAG_00008"; gene_source "ena"; gene_biotype "protein_coding";
1	ena	transcript	28550	32907	.	-	.	gene_id "CNAG_00008"; transcript_id "AFR92146"; gene_source "ena"; gene_biotype "protein_coding"; transcript_source "ena"; transcript_biotype "protein_coding";
1	ena	exon	32601	32907	.	-	.	gene_id "CNAG_00008"; transcript_id "AFR92146"; exon_number "1"; gene_source "ena"; gene_biotype "protein_coding"; transcript_source "ena"; transcript_biotype "protein_coding"; exon_id "AFR92146-1";
1	ena	CDS	32601	32831	.	-	0	gene_id "CNAG_00008"; transcript_id "AFR92146"; exon_number "1"; gene_source "ena"; gene_biotype "protein_coding"; transcript_source "ena"; transcript_biotype "protein_coding"; protein_id "AFR92146"; protein_version "1";
1	ena	start_codon	32829	32831	.	-	0	gene_id "CNAG_00008"; transcript_id "AFR92146"; exon_number "1"; gene_source "ena"; gene_biotype "protein_coding"; transcript_source "ena"; transcript_biotype "protein_coding";
1	ena	exon	32431	32560	.	-	.	gene_id "CNAG_00008"; transcript_id "AFR92146"; exon_number "2"; gene_source "ena"; gene_biotype "protein_coding"; transcript_source "ena"; transcript_biotype "protein_coding"; exon_id "AFR92146-2";
1	ena	CDS	32431	32560	.	-	0	gene_id "CNAG_00008"; transcript_id "AFR92146"; exon_number "2"; gene_source "ena"; gene_biotype "protein_coding"; transcript_source "ena"; transcript_biotype "protein_coding"; protein_id "AFR92146"; protein_version "1";
1	ena	exon	32116	32377	.	-	.	gene_id "CNAG_00008"; transcript_id "AFR92146"; exon_number "3"; gene_source "ena"; gene_biotype "protein_coding"; transcript_source "ena"; transcript_biotype "protein_coding"; exon_id "AFR92146-3";
1	ena	CDS	32116	32377	.	-	2	gene_id "CNAG_00008"; transcript_id "AFR92146"; exon_number "3"; gene_source "ena"; gene_biotype "protein_coding"; transcript_source "ena"; transcript_biotype "protein_coding"; protein_id "AFR92146"; protein_version "1";
1	ena	exon	31919	32076	.	-	.	gene_id "CNAG_00008"; transcript_id "AFR92146"; exon_number "4"; gene_source "ena"; gene_biotype "protein_coding"; transcript_source "ena"; transcript_biotype "protein_coding"; exon_id "AFR92146-4";
1	ena	CDS	31919	32076	.	-	1	gene_id "CNAG_00008"; transcript_id "AFR92146"; exon_number "4"; gene_source "ena"; gene_biotype "protein_coding"; transcript_source "ena"; transcript_biotype "protein_coding"; protein_id "AFR92146"; protein_version "1";
1	ena	exon	31680	31880	.	-	.	gene_id "CNAG_00008"; transcript_id "AFR92146"; exon_number "5"; gene_source "ena"; gene_biotype "protein_coding"; transcript_source "ena"; transcript_biotype "protein_coding"; exon_id "AFR92146-5";
1	ena	CDS	31680	31880	.	-	2	gene_id "CNAG_00008"; transcript_id "AFR92146"; exon_number "5"; gene_source "ena"; gene_biotype "protein_coding"; transcript_source "ena"; transcript_biotype "protein_coding"; protein_id "AFR92146"; protein_version "1";
1	ena	exon	30950	31641	.	-	.	gene_id "CNAG_00008"; transcript_id "AFR92146"; exon_number "6"; gene_source "ena"; gene_biotype "protein_coding"; transcript_source "ena"; transcript_biotype "protein_coding"; exon_id "AFR92146-6";
1	ena	CDS	30950	31641	.	-	2	gene_id "CNAG_00008"; transcript_id "AFR92146"; exon_number "6"; gene_source "ena"; gene_biotype "protein_coding"; transcript_source "ena"; transcript_biotype "protein_coding"; protein_id "AFR92146"; protein_version "1";
1	ena	exon	30744	30894	.	-	.	gene_id "CNAG_00008"; transcript_id "AFR92146"; exon_number "7"; gene_source "ena"; gene_biotype "protein_coding"; transcript_source "ena"; transcript_biotype "protein_coding"; exon_id "AFR92146-7";
1	ena	CDS	30744	30894	.	-	0	gene_id "CNAG_00008"; transcript_id "AFR92146"; exon_number "7"; gene_source "ena"; gene_biotype "protein_coding"; transcript_source "ena"; transcript_biotype "protein_coding"; protein_id "AFR92146"; protein_version "1";
1	ena	exon	30546	30671	.	-	.	gene_id "CNAG_00008"; transcript_id "AFR92146"; exon_number "8"; gene_source "ena"; gene_biotype "protein_coding"; transcript_source "ena"; transcript_biotype "protein_coding"; exon_id "AFR92146-8";
1	ena	CDS	30546	30671	.	-	2	gene_id "CNAG_00008"; transcript_id "AFR92146"; exon_number "8"; gene_source "ena"; gene_biotype "protein_coding"; transcript_source "ena"; transcript_biotype "protein_coding"; protein_id "AFR92146"; protein_version "1";
1	ena	exon	30358	30487	.	-	.	gene_id "CNAG_00008"; transcript_id "AFR92146"; exon_number "9"; gene_source "ena"; gene_biotype "protein_coding"; transcript_source "ena"; transcript_biotype "protein_coding"; exon_id "AFR92146-9";
1	ena	CDS	30358	30487	.	-	2	gene_id "CNAG_00008"; transcript_id "AFR92146"; exon_number "9"; gene_source "ena"; gene_biotype "protein_coding"; transcript_source "ena"; transcript_biotype "protein_coding"; protein_id "AFR92146"; protein_version "1";
1	ena	exon	30082	30307	.	-	.	gene_id "CNAG_00008"; transcript_id "AFR92146"; exon_number "10"; gene_source "ena"; gene_biotype "protein_coding"; transcript_source "ena"; transcript_biotype "protein_coding"; exon_id "AFR92146-10";
1	ena	CDS	30082	30307	.	-	1	gene_id "CNAG_00008"; transcript_id "AFR92146"; exon_number "10"; gene_source "ena"; gene_biotype "protein_coding"; transcript_source "ena"; transcript_biotype "protein_coding"; protein_id "AFR92146"; protein_version "1";
1	ena	exon	29897	30002	.	-	.	gene_id "CNAG_00008"; transcript_id "AFR92146"; exon_number "11"; gene_source "ena"; gene_biotype "protein_coding"; transcript_source "ena"; transcript_biotype "protein_coding"; exon_id "AFR92146-11";
1	ena	CDS	29897	30002	.	-	0	gene_id "CNAG_00008"; transcript_id "AFR92146"; exon_number "11"; gene_source "ena"; gene_biotype "protein_coding"; transcript_source "ena"; transcript_biotype "protein_coding"; protein_id "AFR92146"; protein_version "1";
1	ena	exon	29729	29838	.	-	.	gene_id "CNAG_00008"; transcript_id "AFR92146"; exon_number "12"; gene_source "ena"; gene_biotype "protein_coding"; transcript_source "ena"; transcript_biotype "protein_coding"; exon_id "AFR92146-12";
1	ena	CDS	29729	29838	.	-	2	gene_id "CNAG_00008"; transcript_id "AFR92146"; exon_number "12"; gene_source "ena"; gene_biotype "protein_coding"; transcript_source "ena"; transcript_biotype "protein_coding"; protein_id "AFR92146"; protein_version "1";
1	ena	exon	28954	29673	.	-	.	gene_id "CNAG_00008"; transcript_id "AFR92146"; exon_number "13"; gene_source "ena"; gene_biotype "protein_coding"; transcript_source "ena"; transcript_biotype "protein_coding"; exon_id "AFR92146-13";
1	ena	CDS	28954	29673	.	-	0	gene_id "CNAG_00008"; transcript_id "AFR92146"; exon_number "13"; gene_source "ena"; gene_biotype "protein_coding"; transcript_source "ena"; transcript_biotype "protein_coding"; protein_id "AFR92146"; protein_version "1";
1	ena	exon	28550	28885	.	-	.	gene_id "CNAG_00008"; transcript_id "AFR92146"; exon_number "14"; gene_source "ena"; gene_biotype "protein_coding"; transcript_source "ena"; transcript_biotype "protein_coding"; exon_id "AFR92146-14";
1	ena	CDS	28622	28885	.	-	0	gene_id "CNAG_00008"; transcript_id "AFR92146"; exon_number "14"; gene_source "ena"; gene_biotype "protein_coding"; transcript_source "ena"; transcript_biotype "protein_coding"; protein_id "AFR92146"; protein_version "1";
1	ena	stop_codon	28619	28621	.	-	0	gene_id "CNAG_00008"; transcript_id "AFR92146"; exon_number "14"; gene_source "ena"; gene_biotype "protein_coding"; transcript_source "ena"; transcript_biotype "protein_coding";
1	ena	five_prime_utr	32832	32907	.	-	.	gene_id "CNAG_00008"; transcript_id "AFR92146"; gene_source "ena"; gene_biotype "protein_coding"; transcript_source "ena"; transcript_biotype "protein_coding";
1	ena	three_prime_utr	28550	28618	.	-	.	gene_id "CNAG_00008"; transcript_id "AFR92146"; gene_source "ena"; gene_biotype "protein_coding"; transcript_source "ena"; transcript_biotype "protein_coding";
1	ena	gene	33099	34872	.	+	.	gene_id "CNAG_00009"; gene_source "ena"; gene_biotype "protein_coding";
1	ena	transcript	33099	34872	.	+	.	gene_id "CNAG_00009"; transcript_id "AFR92147"; gene_source "ena"; gene_biotype "protein_coding"; transcript_source "ena"; transcript_biotype "protein_coding";
1	ena	exon	33099	33745	.	+	.	gene_id "CNAG_00009"; transcript_id "AFR92147"; exon_number "1"; gene_source "ena"; gene_biotype "protein_coding"; transcript_source "ena"; transcript_biotype "protein_coding"; exon_id "AFR92147-1";
1	ena	CDS	33159	33745	.	+	0	gene_id "CNAG_00009"; transcript_id "AFR92147"; exon_number "1"; gene_source "ena"; gene_biotype "protein_coding"; transcript_source "ena"; transcript_biotype "protein_coding"; protein_id "AFR92147"; protein_version "1";
1	ena	start_codon	33159	33161	.	+	0	gene_id "CNAG_00009"; transcript_id "AFR92147"; exon_number "1"; gene_source "ena"; gene_biotype "protein_coding"; transcript_source "ena"; transcript_biotype "protein_coding";
1	ena	exon	33794	33902	.	+	.	gene_id "CNAG_00009"; transcript_id "AFR92147"; exon_number "2"; gene_source "ena"; gene_biotype "protein_coding"; transcript_source "ena"; transcript_biotype "protein_coding"; exon_id "AFR92147-2";
1	ena	CDS	33794	33902	.	+	1	gene_id "CNAG_00009"; transcript_id "AFR92147"; exon_number "2"; gene_source "ena"; gene_biotype "protein_coding"; transcript_source "ena"; transcript_biotype "protein_coding"; protein_id "AFR92147"; protein_version "1";
1	ena	exon	33954	33960	.	+	.	gene_id "CNAG_00009"; transcript_id "AFR92147"; exon_number "3"; gene_source "ena"; gene_biotype "protein_coding"; transcript_source "ena"; transcript_biotype "protein_coding"; exon_id "AFR92147-3";
1	ena	CDS	33954	33960	.	+	0	gene_id "CNAG_00009"; transcript_id "AFR92147"; exon_number "3"; gene_source "ena"; gene_biotype "protein_coding"; transcript_source "ena"; transcript_biotype "protein_coding"; protein_id "AFR92147"; protein_version "1";
1	ena	exon	34007	34077	.	+	.	gene_id "CNAG_00009"; transcript_id "AFR92147"; exon_number "4"; gene_source "ena"; gene_biotype "protein_coding"; transcript_source "ena"; transcript_biotype "protein_coding"; exon_id "AFR92147-4";
1	ena	CDS	34007	34077	.	+	2	gene_id "CNAG_00009"; transcript_id "AFR92147"; exon_number "4"; gene_source "ena"; gene_biotype "protein_coding"; transcript_source "ena"; transcript_biotype "protein_coding"; protein_id "AFR92147"; protein_version "1";
1	ena	exon	34136	34380	.	+	.	gene_id "CNAG_00009"; transcript_id "AFR92147"; exon_number "5"; gene_source "ena"; gene_biotype "protein_coding"; transcript_source "ena"; transcript_biotype "protein_coding"; exon_id "AFR92147-5";
1	ena	CDS	34136	34380	.	+	0	gene_id "CNAG_00009"; transcript_id "AFR92147"; exon_number "5"; gene_source "ena"; gene_biotype "protein_coding"; transcript_source "ena"; transcript_biotype "protein_coding"; protein_id "AFR92147"; protein_version "1";
1	ena	exon	34438	34486	.	+	.	gene_id "CNAG_00009"; transcript_id "AFR92147"; exon_number "6"; gene_source "ena"; gene_biotype "protein_coding"; transcript_source "ena"; transcript_biotype "protein_coding"; exon_id "AFR92147-6";
1	ena	CDS	34438	34486	.	+	1	gene_id "CNAG_00009"; transcript_id "AFR92147"; exon_number "6"; gene_source "ena"; gene_biotype "protein_coding"; transcript_source "ena"; transcript_biotype "protein_coding"; protein_id "AFR92147"; protein_version "1";
1	ena	exon	34548	34872	.	+	.	gene_id "CNAG_00009"; transcript_id "AFR92147"; exon_number "7"; gene_source "ena"; gene_biotype "protein_coding"; transcript_source "ena"; transcript_biotype "protein_coding"; exon_id "AFR92147-7";
1	ena	CDS	34548	34577	.	+	0	gene_id "CNAG_00009"; transcript_id "AFR92147"; exon_number "7"; gene_source "ena"; gene_biotype "protein_coding"; transcript_source "ena"; transcript_biotype "protein_coding"; protein_id "AFR92147"; protein_version "1";
1	ena	five_prime_utr	33099	33158	.	+	.	gene_id "CNAG_00009"; transcript_id "AFR92147"; gene_source "ena"; gene_biotype "protein_coding"; transcript_source "ena"; transcript_biotype "protein_coding";
1	ena	three_prime_utr	34578	34872	.	+	.	gene_id "CNAG_00009"; transcript_id "AFR92147"; gene_source "ena"; gene_biotype "protein_coding"; transcript_source "ena"; transcript_biotype "protein_coding";
1	ena	gene	35760	39836	.	-	.	gene_id "CNAG_00010"; gene_source "ena"; gene_biotype "protein_coding";
1	ena	transcript	35760	39836	.	-	.	gene_id "CNAG_00010"; transcript_id "AFR92148"; gene_source "ena"; gene_biotype "protein_coding"; transcript_source "ena"; transcript_biotype "protein_coding";
1	ena	exon	38064	39836	.	-	.	gene_id "CNAG_00010"; transcript_id "AFR92148"; exon_number "1"; gene_source "ena"; gene_biotype "protein_coding"; transcript_source "ena"; transcript_biotype "protein_coding"; exon_id "AFR92148-1";
1	ena	CDS	38064	39419	.	-	0	gene_id "CNAG_00010"; transcript_id "AFR92148"; exon_number "1"; gene_source "ena"; gene_biotype "protein_coding"; transcript_source "ena"; transcript_biotype "protein_coding"; protein_id "AFR92148"; protein_version "1";
1	ena	start_codon	39417	39419	.	-	0	gene_id "CNAG_00010"; transcript_id "AFR92148"; exon_number "1"; gene_source "ena"; gene_biotype "protein_coding"; transcript_source "ena"; transcript_biotype "protein_coding";
1	ena	exon	37440	37961	.	-	.	gene_id "CNAG_00010"; transcript_id "AFR92148"; exon_number "2"; gene_source "ena"; gene_biotype "protein_coding"; transcript_source "ena"; transcript_biotype "protein_coding"; exon_id "AFR92148-2";
1	ena	CDS	37440	37961	.	-	0	gene_id "CNAG_00010"; transcript_id "AFR92148"; exon_number "2"; gene_source "ena"; gene_biotype "protein_coding"; transcript_source "ena"; transcript_biotype "protein_coding"; protein_id "AFR92148"; protein_version "1";
1	ena	exon	36694	37354	.	-	.	gene_id "CNAG_00010"; transcript_id "AFR92148"; exon_number "3"; gene_source "ena"; gene_biotype "protein_coding"; transcript_source "ena"; transcript_biotype "protein_coding"; exon_id "AFR92148-3";
1	ena	CDS	36694	37354	.	-	0	gene_id "CNAG_00010"; transcript_id "AFR92148"; exon_number "3"; gene_source "ena"; gene_biotype "protein_coding"; transcript_source "ena"; transcript_biotype "protein_coding"; protein_id "AFR92148"; protein_version "1";
1	ena	exon	36444	36623	.	-	.	gene_id "CNAG_00010"; transcript_id "AFR92148"; exon_number "4"; gene_source "ena"; gene_biotype "protein_coding"; transcript_source "ena"; transcript_biotype "protein_coding"; exon_id "AFR92148-4";
1	ena	CDS	36444	36623	.	-	2	gene_id "CNAG_00010"; transcript_id "AFR92148"; exon_number "4"; gene_source "ena"; gene_biotype "protein_coding"; transcript_source "ena"; transcript_biotype "protein_coding"; protein_id "AFR92148"; protein_version "1";
1	ena	exon	35760	36270	.	-	.	gene_id "CNAG_00010"; transcript_id "AFR92148"; exon_number "5"; gene_source "ena"; gene_biotype "protein_coding"; transcript_source "ena"; transcript_biotype "protein_coding"; exon_id "AFR92148-5";
1	ena	CDS	36020	36270	.	-	2	gene_id "CNAG_00010"; transcript_id "AFR92148"; exon_number "5"; gene_source "ena"; gene_biotype "protein_coding"; transcript_source "ena"; transcript_biotype "protein_coding"; protein_id "AFR92148"; protein_version "1";
1	ena	five_prime_utr	39420	39836	.	-	.	gene_id "CNAG_00010"; transcript_id "AFR92148"; gene_source "ena"; gene_biotype "protein_coding"; transcript_source "ena"; transcript_biotype "protein_coding";
1	ena	three_prime_utr	35760	36019	.	-	.	gene_id "CNAG_00010"; transcript_id "AFR92148"; gene_source "ena"; gene_biotype "protein_coding"; transcript_source "ena"; transcript_biotype "protein_coding";
1	ena	gene	40233	42271	.	+	.	gene_id "CNAG_00011"; gene_source "ena"; gene_biotype "protein_coding";
1	ena	transcript	40233	42271	.	+	.	gene_id "CNAG_00011"; transcript_id "AFR92149"; gene_source "ena"; gene_biotype "protein_coding"; transcript_source "ena"; transcript_biotype "protein_coding";
1	ena	exon	40233	40496	.	+	.	gene_id "CNAG_00011"; transcript_id "AFR92149"; exon_number "1"; gene_source "ena"; gene_biotype "protein_coding"; transcript_source "ena"; transcript_biotype "protein_coding"; exon_id "AFR92149-1";
1	ena	CDS	40321	40496	.	+	0	gene_id "CNAG_00011"; transcript_id "AFR92149"; exon_number "1"; gene_source "ena"; gene_biotype "protein_coding"; transcript_source "ena"; transcript_biotype "protein_coding"; protein_id "AFR92149"; protein_version "1";
1	ena	start_codon	40321	40323	.	+	0	gene_id "CNAG_00011"; transcript_id "AFR92149"; exon_number "1"; gene_source "ena"; gene_biotype "protein_coding"; transcript_source "ena"; transcript_biotype "protein_coding";
1	ena	exon	40782	40838	.	+	.	gene_id "CNAG_00011"; transcript_id "AFR92149"; exon_number "2"; gene_source "ena"; gene_biotype "protein_coding"; transcript_source "ena"; transcript_biotype "protein_coding"; exon_id "AFR92149-2";
1	ena	CDS	40782	40838	.	+	1	gene_id "CNAG_00011"; transcript_id "AFR92149"; exon_number "2"; gene_source "ena"; gene_biotype "protein_coding"; transcript_source "ena"; transcript_biotype "protein_coding"; protein_id "AFR92149"; protein_version "1";
1	ena	exon	40908	41024	.	+	.	gene_id "CNAG_00011"; transcript_id "AFR92149"; exon_number "3"; gene_source "ena"; gene_biotype "protein_coding"; transcript_source "ena"; transcript_biotype "protein_coding"; exon_id "AFR92149-3";
1	ena	CDS	40908	41024	.	+	1	gene_id "CNAG_00011"; transcript_id "AFR92149"; exon_number "3"; gene_source "ena"; gene_biotype "protein_coding"; transcript_source "ena"; transcript_biotype "protein_coding"; protein_id "AFR92149"; protein_version "1";
1	ena	exon	41093	41157	.	+	.	gene_id "CNAG_00011"; transcript_id "AFR92149"; exon_number "4"; gene_source "ena"; gene_biotype "protein_coding"; transcript_source "ena"; transcript_biotype "protein_coding"; exon_id "AFR92149-4";
1	ena	CDS	41093	41157	.	+	1	gene_id "CNAG_00011"; transcript_id "AFR92149"; exon_number "4"; gene_source "ena"; gene_biotype "protein_coding"; transcript_source "ena"; transcript_biotype "protein_coding"; protein_id "AFR92149"; protein_version "1";
1	ena	exon	41471	41807	.	+	.	gene_id "CNAG_00011"; transcript_id "AFR92149"; exon_number "5"; gene_source "ena"; gene_biotype "protein_coding"; transcript_source "ena"; transcript_biotype "protein_coding"; exon_id "AFR92149-5";
1	ena	CDS	41471	41807	.	+	2	gene_id "CNAG_00011"; transcript_id "AFR92149"; exon_number "5"; gene_source "ena"; gene_biotype "protein_coding"; transcript_source "ena"; transcript_biotype "protein_coding"; protein_id "AFR92149"; protein_version "1";
1	ena	exon	41869	42271	.	+	.	gene_id "CNAG_00011"; transcript_id "AFR92149"; exon_number "6"; gene_source "ena"; gene_biotype "protein_coding"; transcript_source "ena"; transcript_biotype "protein_coding"; exon_id "AFR92149-6";
1	ena	CDS	41869	42076	.	+	1	gene_id "CNAG_00011"; transcript_id "AFR92149"; exon_number "6"; gene_source "ena"; gene_biotype "protein_coding"; transcript_source "ena"; transcript_biotype "protein_coding"; protein_id "AFR92149"; protein_version "1";
1	ena	stop_codon	42077	42079	.	+	0	gene_id "CNAG_00011"; transcript_id "AFR92149"; exon_number "6"; gene_source "ena"; gene_biotype "protein_coding"; transcript_source "ena"; transcript_biotype "protein_coding";
1	ena	five_prime_utr	40233	40320	.	+	.	gene_id "CNAG_00011"; transcript_id "AFR92149"; gene_source "ena"; gene_biotype "protein_coding"; transcript_source "ena"; transcript_biotype "protein_coding";
1	ena	three_prime_utr	42080	42271	.	+	.	gene_id "CNAG_00011"; transcript_id "AFR92149"; gene_source "ena"; gene_biotype "protein_coding"; transcript_source "ena"; transcript_biotype "protein_coding";
1	ena	gene	43265	44924	.	+	.	gene_id "CNAG_00012"; gene_source "ena"; gene_biotype "protein_coding";
1	ena	transcript	43265	44924	.	+	.	gene_id "CNAG_00012"; transcript_id "AFR92150"; gene_source "ena"; gene_biotype "protein_coding"; transcript_source "ena"; transcript_biotype "protein_coding";
1	ena	exon	43265	43640	.	+	.	gene_id "CNAG_00012"; transcript_id "AFR92150"; exon_number "1"; gene_source "ena"; gene_biotype "protein_coding"; transcript_source "ena"; transcript_biotype "protein_coding"; exon_id "AFR92150-1";
1	ena	CDS	43365	43640	.	+	0	gene_id "CNAG_00012"; transcript_id "AFR92150"; exon_number "1"; gene_source "ena"; gene_biotype "protein_coding"; transcript_source "ena"; transcript_biotype "protein_coding"; protein_id "AFR92150"; protein_version "1";
1	ena	start_codon	43365	43367	.	+	0	gene_id "CNAG_00012"; transcript_id "AFR92150"; exon_number "1"; gene_source "ena"; gene_biotype "protein_coding"; transcript_source "ena"; transcript_biotype "protein_coding";
1	ena	exon	43708	43877	.	+	.	gene_id "CNAG_00012"; transcript_id "AFR92150"; exon_number "2"; gene_source "ena"; gene_biotype "protein_coding"; transcript_source "ena"; transcript_biotype "protein_coding"; exon_id "AFR92150-2";
1	ena	CDS	43708	43877	.	+	0	gene_id "CNAG_00012"; transcript_id "AFR92150"; exon_number "2"; gene_source "ena"; gene_biotype "protein_coding"; transcript_source "ena"; transcript_biotype "protein_coding"; protein_id "AFR92150"; protein_version "1";
1	ena	exon	43960	44078	.	+	.	gene_id "CNAG_00012"; transcript_id "AFR92150"; exon_number "3"; gene_source "ena"; gene_biotype "protein_coding"; transcript_source "ena"; transcript_biotype "protein_coding"; exon_id "AFR92150-3";
1	ena	CDS	43960	44078	.	+	1	gene_id "CNAG_00012"; transcript_id "AFR92150"; exon_number "3"; gene_source "ena"; gene_biotype "protein_coding"; transcript_source "ena"; transcript_biotype "protein_coding"; protein_id "AFR92150"; protein_version "1";
1	ena	exon	44139	44447	.	+	.	gene_id "CNAG_00012"; transcript_id "AFR92150"; exon_number "4"; gene_source "ena"; gene_biotype "protein_coding"; transcript_source "ena"; transcript_biotype "protein_coding"; exon_id "AFR92150-4";
1	ena	CDS	44139	44447	.	+	2	gene_id "CNAG_00012"; transcript_id "AFR92150"; exon_number "4"; gene_source "ena"; gene_biotype "protein_coding"; transcript_source "ena"; transcript_biotype "protein_coding"; protein_id "AFR92150"; protein_version "1";
1	ena	exon	44532	44924	.	+	.	gene_id "CNAG_00012"; transcript_id "AFR92150"; exon_number "5"; gene_source "ena"; gene_biotype "protein_coding"; transcript_source "ena"; transcript_biotype "protein_coding"; exon_id "AFR92150-5";
1	ena	CDS	44532	44818	.	+	2	gene_id "CNAG_00012"; transcript_id "AFR92150"; exon_number "5"; gene_source "ena"; gene_biotype "protein_coding"; transcript_source "ena"; transcript_biotype "protein_coding"; protein_id "AFR92150"; protein_version "1";
1	ena	five_prime_utr	43265	43364	.	+	.	gene_id "CNAG_00012"; transcript_id "AFR92150"; gene_source "ena"; gene_biotype "protein_coding"; transcript_source "ena"; transcript_biotype "protein_coding";
1	ena	three_prime_utr	44819	44924	.	+	.	gene_id "CNAG_00012"; transcript_id "AFR92150"; gene_source "ena"; gene_biotype "protein_coding"; transcript_source "ena"; transcript_biotype "protein_coding";
1	ena	gene	44568	47214	.	-	.	gene_id "CNAG_00013"; gene_source "ena"; gene_biotype "protein_coding";
1	ena	transcript	44568	47214	.	-	.	gene_id "CNAG_00013"; transcript_id "AGV15256"; gene_source "ena"; gene_biotype "protein_coding"; transcript_source "ena"; transcript_biotype "protein_coding";
1	ena	exon	45836	47214	.	-	.	gene_id "CNAG_00013"; transcript_id "AGV15256"; exon_number "1"; gene_source "ena"; gene_biotype "protein_coding"; transcript_source "ena"; transcript_biotype "protein_coding"; exon_id "AGV15256-1";
1	ena	CDS	45836	46007	.	-	0	gene_id "CNAG_00013"; transcript_id "AGV15256"; exon_number "1"; gene_source "ena"; gene_biotype "protein_coding"; transcript_source "ena"; transcript_biotype "protein_coding"; protein_id "AGV15256"; protein_version "1";
1	ena	start_codon	46005	46007	.	-	0	gene_id "CNAG_00013"; transcript_id "AGV15256"; exon_number "1"; gene_source "ena"; gene_biotype "protein_coding"; transcript_source "ena"; transcript_biotype "protein_coding";
1	ena	exon	44568	45782	.	-	.	gene_id "CNAG_00013"; transcript_id "AGV15256"; exon_number "2"; gene_source "ena"; gene_biotype "protein_coding"; transcript_source "ena"; transcript_biotype "protein_coding"; exon_id "AGV15256-2";
1	ena	CDS	45340	45782	.	-	2	gene_id "CNAG_00013"; transcript_id "AGV15256"; exon_number "2"; gene_source "ena"; gene_biotype "protein_coding"; transcript_source "ena"; transcript_biotype "protein_coding"; protein_id "AGV15256"; protein_version "1";
1	ena	five_prime_utr	46008	47214	.	-	.	gene_id "CNAG_00013"; transcript_id "AGV15256"; gene_source "ena"; gene_biotype "protein_coding"; transcript_source "ena"; transcript_biotype "protein_coding";
1	ena	three_prime_utr	44568	45339	.	-	.	gene_id "CNAG_00013"; transcript_id "AGV15256"; gene_source "ena"; gene_biotype "protein_coding"; transcript_source "ena"; transcript_biotype "protein_coding";
1	ena	transcript	45340	46007	.	-	.	gene_id "CNAG_00013"; transcript_id "AFR92151"; gene_source "ena"; gene_biotype "protein_coding"; transcript_source "ena"; transcript_biotype "protein_coding";
1	ena	exon	45836	46007	.	-	.	gene_id "CNAG_00013"; transcript_id "AFR92151"; exon_number "1"; gene_source "ena"; gene_biotype "protein_coding"; transcript_source "ena"; transcript_biotype "protein_coding"; exon_id "AGV15255-1";
1	ena	CDS	45836	46007	.	-	0	gene_id "CNAG_00013"; transcript_id "AFR92151"; exon_number "1"; gene_source "ena"; gene_biotype "protein_coding"; transcript_source "ena"; transcript_biotype "protein_coding"; protein_id "AFR92151"; protein_version "1";
1	ena	start_codon	46005	46007	.	-	0	gene_id "CNAG_00013"; transcript_id "AFR92151"; exon_number "1"; gene_source "ena"; gene_biotype "protein_coding"; transcript_source "ena"; transcript_biotype "protein_coding";
1	ena	exon	45340	45782	.	-	.	gene_id "CNAG_00013"; transcript_id "AFR92151"; exon_number "2"; gene_source "ena"; gene_biotype "protein_coding"; transcript_source "ena"; transcript_biotype "protein_coding"; exon_id "AGV15255-2";
1	ena	CDS	45343	45782	.	-	2	gene_id "CNAG_00013"; transcript_id "AFR92151"; exon_number "2"; gene_source "ena"; gene_biotype "protein_coding"; transcript_source "ena"; transcript_biotype "protein_coding"; protein_id "AFR92151"; protein_version "1";
1	ena	stop_codon	45340	45342	.	-	0	gene_id "CNAG_00013"; transcript_id "AFR92151"; exon_number "2"; gene_source "ena"; gene_biotype "protein_coding"; transcript_source "ena"; transcript_biotype "protein_coding";
1	ena	transcript	45340	46007	.	-	.	gene_id "CNAG_00013"; transcript_id "AGV15255"; gene_source "ena"; gene_biotype "protein_coding"; transcript_source "ena"; transcript_biotype "protein_coding";
1	ena	exon	45836	46007	.	-	.	gene_id "CNAG_00013"; transcript_id "AGV15255"; exon_number "1"; gene_source "ena"; gene_biotype "protein_coding"; transcript_source "ena"; transcript_biotype "protein_coding"; exon_id "AGV15255-1";
1	ena	CDS	45836	46007	.	-	0	gene_id "CNAG_00013"; transcript_id "AGV15255"; exon_number "1"; gene_source "ena"; gene_biotype "protein_coding"; transcript_source "ena"; transcript_biotype "protein_coding"; protein_id "AGV15255"; protein_version "1";
1	ena	start_codon	46005	46007	.	-	0	gene_id "CNAG_00013"; transcript_id "AGV15255"; exon_number "1"; gene_source "ena"; gene_biotype "protein_coding"; transcript_source "ena"; transcript_biotype "protein_coding";
1	ena	exon	45340	45782	.	-	.	gene_id "CNAG_00013"; transcript_id "AGV15255"; exon_number "2"; gene_source "ena"; gene_biotype "protein_coding"; transcript_source "ena"; transcript_biotype "protein_coding"; exon_id "AGV15255-2";
1	ena	CDS	45343	45782	.	-	2	gene_id "CNAG_00013"; transcript_id "AGV15255"; exon_number "2"; gene_source "ena"; gene_biotype "protein_coding"; transcript_source "ena"; transcript_biotype "protein_coding"; protein_id "AGV15255"; protein_version "1";
1	ena	stop_codon	45340	45342	.	-	0	gene_id "CNAG_00013"; transcript_id "AGV15255"; exon_number "2"; gene_source "ena"; gene_biotype "protein_coding"; transcript_source "ena"; transcript_biotype "protein_coding";
1	ena	gene	46698	49627	.	+	.	gene_id "CNAG_00014"; gene_source "ena"; gene_biotype "protein_coding";
1	ena	transcript	46698	49627	.	+	.	gene_id "CNAG_00014"; transcript_id "AFR92152"; gene_source "ena"; gene_biotype "protein_coding"; transcript_source "ena"; transcript_biotype "protein_coding";
1	ena	exon	46698	47199	.	+	.	gene_id "CNAG_00014"; transcript_id "AFR92152"; exon_number "1"; gene_source "ena"; gene_biotype "protein_coding"; transcript_source "ena"; transcript_biotype "protein_coding"; exon_id "AFR92152-1";
1	ena	CDS	46824	47199	.	+	0	gene_id "CNAG_00014"; transcript_id "AFR92152"; exon_number "1"; gene_source "ena"; gene_biotype "protein_coding"; transcript_source "ena"; transcript_biotype "protein_coding"; protein_id "AFR92152"; protein_version "1";
1	ena	start_codon	46824	46826	.	+	0	gene_id "CNAG_00014"; transcript_id "AFR92152"; exon_number "1"; gene_source "ena"; gene_biotype "protein_coding"; transcript_source "ena"; transcript_biotype "protein_coding";
1	ena	exon	47250	47261	.	+	.	gene_id "CNAG_00014"; transcript_id "AFR92152"; exon_number "2"; gene_source "ena"; gene_biotype "protein_coding"; transcript_source "ena"; transcript_biotype "protein_coding"; exon_id "AFR92152-2";
1	ena	CDS	47250	47261	.	+	2	gene_id "CNAG_00014"; transcript_id "AFR92152"; exon_number "2"; gene_source "ena"; gene_biotype "protein_coding"; transcript_source "ena"; transcript_biotype "protein_coding"; protein_id "AFR92152"; protein_version "1";
1	ena	exon	47336	48364	.	+	.	gene_id "CNAG_00014"; transcript_id "AFR92152"; exon_number "3"; gene_source "ena"; gene_biotype "protein_coding"; transcript_source "ena"; transcript_biotype "protein_coding"; exon_id "AFR92152-3";
1	ena	CDS	47336	48364	.	+	2	gene_id "CNAG_00014"; transcript_id "AFR92152"; exon_number "3"; gene_source "ena"; gene_biotype "protein_coding"; transcript_source "ena"; transcript_biotype "protein_coding"; protein_id "AFR92152"; protein_version "1";
1	ena	exon	48417	49627	.	+	.	gene_id "CNAG_00014"; transcript_id "AFR92152"; exon_number "4"; gene_source "ena"; gene_biotype "protein_coding"; transcript_source "ena"; transcript_biotype "protein_coding"; exon_id "AFR92152-4";
1	ena	CDS	48417	48838	.	+	2	gene_id "CNAG_00014"; transcript_id "AFR92152"; exon_number "4"; gene_source "ena"; gene_biotype "protein_coding"; transcript_source "ena"; transcript_biotype "protein_coding"; protein_id "AFR92152"; protein_version "1";
1	ena	stop_codon	48839	48841	.	+	0	gene_id "CNAG_00014"; transcript_id "AFR92152"; exon_number "4"; gene_source "ena"; gene_biotype "protein_coding"; transcript_source "ena"; transcript_biotype "protein_coding";
1	ena	five_prime_utr	46698	46823	.	+	.	gene_id "CNAG_00014"; transcript_id "AFR92152"; gene_source "ena"; gene_biotype "protein_coding"; transcript_source "ena"; transcript_biotype "protein_coding";
1	ena	three_prime_utr	48842	49627	.	+	.	gene_id "CNAG_00014"; transcript_id "AFR92152"; gene_source "ena"; gene_biotype "protein_coding"; transcript_source "ena"; transcript_biotype "protein_coding";
1	ena	gene	50140	51491	.	+	.	gene_id "CNAG_00015"; gene_source "ena"; gene_biotype "protein_coding";
1	ena	transcript	50140	51491	.	+	.	gene_id "CNAG_00015"; transcript_id "AFR92153"; gene_source "ena"; gene_biotype "protein_coding"; transcript_source "ena"; transcript_biotype "protein_coding";
1	ena	exon	50140	50805	.	+	.	gene_id "CNAG_00015"; transcript_id "AFR92153"; exon_number "1"; gene_source "ena"; gene_biotype "protein_coding"; transcript_source "ena"; transcript_biotype "protein_coding"; exon_id "AFR92153-1";
1	ena	CDS	50476	50805	.	+	0	gene_id "CNAG_00015"; transcript_id "AFR92153"; exon_number "1"; gene_source "ena"; gene_biotype "protein_coding"; transcript_source "ena"; transcript_biotype "protein_coding"; protein_id "AFR92153"; protein_version "1";
1	ena	start_codon	50476	50478	.	+	0	gene_id "CNAG_00015"; transcript_id "AFR92153"; exon_number "1"; gene_source "ena"; gene_biotype "protein_coding"; transcript_source "ena"; transcript_biotype "protein_coding";
1	ena	exon	50885	51491	.	+	.	gene_id "CNAG_00015"; transcript_id "AFR92153"; exon_number "2"; gene_source "ena"; gene_biotype "protein_coding"; transcript_source "ena"; transcript_biotype "protein_coding"; exon_id "AFR92153-2";
1	ena	CDS	50885	51193	.	+	0	gene_id "CNAG_00015"; transcript_id "AFR92153"; exon_number "2"; gene_source "ena"; gene_biotype "protein_coding"; transcript_source "ena"; transcript_biotype "protein_coding"; protein_id "AFR92153"; protein_version "1";
1	ena	five_prime_utr	50140	50475	.	+	.	gene_id "CNAG_00015"; transcript_id "AFR92153"; gene_source "ena"; gene_biotype "protein_coding"; transcript_source "ena"; transcript_biotype "protein_coding";
1	ena	three_prime_utr	51194	51491	.	+	.	gene_id "CNAG_00015"; transcript_id "AFR92153"; gene_source "ena"; gene_biotype "protein_coding"; transcript_source "ena"; transcript_biotype "protein_coding";
1	ena	gene	53261	54588	.	+	.	gene_id "CNAG_00016"; gene_source "ena"; gene_biotype "protein_coding";
1	ena	transcript	53261	54588	.	+	.	gene_id "CNAG_00016"; transcript_id "AFR92154"; gene_source "ena"; gene_biotype "protein_coding"; transcript_source "ena"; transcript_biotype "protein_coding";
1	ena	exon	53261	53508	.	+	.	gene_id "CNAG_00016"; transcript_id "AFR92154"; exon_number "1"; gene_source "ena"; gene_biotype "protein_coding"; transcript_source "ena"; transcript_biotype "protein_coding"; exon_id "AFR92154-1";
1	ena	CDS	53388	53508	.	+	0	gene_id "CNAG_00016"; transcript_id "AFR92154"; exon_number "1"; gene_source "ena"; gene_biotype "protein_coding"; transcript_source "ena"; transcript_biotype "protein_coding"; protein_id "AFR92154"; protein_version "1";
1	ena	start_codon	53388	53390	.	+	0	gene_id "CNAG_00016"; transcript_id "AFR92154"; exon_number "1"; gene_source "ena"; gene_biotype "protein_coding"; transcript_source "ena"; transcript_biotype "protein_coding";
1	ena	exon	53598	53625	.	+	.	gene_id "CNAG_00016"; transcript_id "AFR92154"; exon_number "2"; gene_source "ena"; gene_biotype "protein_coding"; transcript_source "ena"; transcript_biotype "protein_coding"; exon_id "AFR92154-2";
1	ena	CDS	53598	53625	.	+	2	gene_id "CNAG_00016"; transcript_id "AFR92154"; exon_number "2"; gene_source "ena"; gene_biotype "protein_coding"; transcript_source "ena"; transcript_biotype "protein_coding"; protein_id "AFR92154"; protein_version "1";
1	ena	exon	53719	53791	.	+	.	gene_id "CNAG_00016"; transcript_id "AFR92154"; exon_number "3"; gene_source "ena"; gene_biotype "protein_coding"; transcript_source "ena"; transcript_biotype "protein_coding"; exon_id "AFR92154-3";
1	ena	CDS	53719	53791	.	+	1	gene_id "CNAG_00016"; transcript_id "AFR92154"; exon_number "3"; gene_source "ena"; gene_biotype "protein_coding"; transcript_source "ena"; transcript_biotype "protein_coding"; protein_id "AFR92154"; protein_version "1";
1	ena	exon	53995	54588	.	+	.	gene_id "CNAG_00016"; transcript_id "AFR92154"; exon_number "4"; gene_source "ena"; gene_biotype "protein_coding"; transcript_source "ena"; transcript_biotype "protein_coding"; exon_id "AFR92154-4";
1	ena	CDS	53995	54024	.	+	0	gene_id "CNAG_00016"; transcript_id "AFR92154"; exon_number "4"; gene_source "ena"; gene_biotype "protein_coding"; transcript_source "ena"; transcript_biotype "protein_coding"; protein_id "AFR92154"; protein_version "1";
1	ena	stop_codon	54025	54027	.	+	0	gene_id "CNAG_00016"; transcript_id "AFR92154"; exon_number "4"; gene_source "ena"; gene_biotype "protein_coding"; transcript_source "ena"; transcript_biotype "protein_coding";
1	ena	five_prime_utr	53261	53387	.	+	.	gene_id "CNAG_00016"; transcript_id "AFR92154"; gene_source "ena"; gene_biotype "protein_coding"; transcript_source "ena"; transcript_biotype "protein_coding";
1	ena	three_prime_utr	54028	54588	.	+	.	gene_id "CNAG_00016"; transcript_id "AFR92154"; gene_source "ena"; gene_biotype "protein_coding"; transcript_source "ena"; transcript_biotype "protein_coding";
1	ena	gene	54509	57772	.	-	.	gene_id "CNAG_00017"; gene_source "ena"; gene_biotype "protein_coding";
1	ena	transcript	54509	57772	.	-	.	gene_id "CNAG_00017"; transcript_id "AFR92155"; gene_source "ena"; gene_biotype "protein_coding"; transcript_source "ena"; transcript_biotype "protein_coding";
1	ena	exon	56670	57772	.	-	.	gene_id "CNAG_00017"; transcript_id "AFR92155"; exon_number "1"; gene_source "ena"; gene_biotype "protein_coding"; transcript_source "ena"; transcript_biotype "protein_coding"; exon_id "AFR92155-1";
1	ena	CDS	56670	57423	.	-	0	gene_id "CNAG_00017"; transcript_id "AFR92155"; exon_number "1"; gene_source "ena"; gene_biotype "protein_coding"; transcript_source "ena"; transcript_biotype "protein_coding"; protein_id "AFR92155"; protein_version "1";
1	ena	start_codon	57421	57423	.	-	0	gene_id "CNAG_00017"; transcript_id "AFR92155"; exon_number "1"; gene_source "ena"; gene_biotype "protein_coding"; transcript_source "ena"; transcript_biotype "protein_coding";
1	ena	exon	56516	56598	.	-	.	gene_id "CNAG_00017"; transcript_id "AFR92155"; exon_number "2"; gene_source "ena"; gene_biotype "protein_coding"; transcript_source "ena"; transcript_biotype "protein_coding"; exon_id "AFR92155-2";
1	ena	CDS	56516	56598	.	-	2	gene_id "CNAG_00017"; transcript_id "AFR92155"; exon_number "2"; gene_source "ena"; gene_biotype "protein_coding"; transcript_source "ena"; transcript_biotype "protein_coding"; protein_id "AFR92155"; protein_version "1";
1	ena	exon	56353	56412	.	-	.	gene_id "CNAG_00017"; transcript_id "AFR92155"; exon_number "3"; gene_source "ena"; gene_biotype "protein_coding"; transcript_source "ena"; transcript_biotype "protein_coding"; exon_id "AFR92155-3";
1	ena	CDS	56353	56412	.	-	0	gene_id "CNAG_00017"; transcript_id "AFR92155"; exon_number "3"; gene_source "ena"; gene_biotype "protein_coding"; transcript_source "ena"; transcript_biotype "protein_coding"; protein_id "AFR92155"; protein_version "1";
1	ena	exon	56157	56264	.	-	.	gene_id "CNAG_00017"; transcript_id "AFR92155"; exon_number "4"; gene_source "ena"; gene_biotype "protein_coding"; transcript_source "ena"; transcript_biotype "protein_coding"; exon_id "AFR92155-4";
1	ena	CDS	56157	56264	.	-	0	gene_id "CNAG_00017"; transcript_id "AFR92155"; exon_number "4"; gene_source "ena"; gene_biotype "protein_coding"; transcript_source "ena"; transcript_biotype "protein_coding"; protein_id "AFR92155"; protein_version "1";
1	ena	exon	54509	56057	.	-	.	gene_id "CNAG_00017"; transcript_id "AFR92155"; exon_number "5"; gene_source "ena"; gene_biotype "protein_coding"; transcript_source "ena"; transcript_biotype "protein_coding"; exon_id "AFR92155-5";
1	ena	CDS	54702	56057	.	-	0	gene_id "CNAG_00017"; transcript_id "AFR92155"; exon_number "5"; gene_source "ena"; gene_biotype "protein_coding"; transcript_source "ena"; transcript_biotype "protein_coding"; protein_id "AFR92155"; protein_version "1";
1	ena	five_prime_utr	57424	57772	.	-	.	gene_id "CNAG_00017"; transcript_id "AFR92155"; gene_source "ena"; gene_biotype "protein_coding"; transcript_source "ena"; transcript_biotype "protein_coding";
1	ena	three_prime_utr	54509	54701	.	-	.	gene_id "CNAG_00017"; transcript_id "AFR92155"; gene_source "ena"; gene_biotype "protein_coding"; transcript_source "ena"; transcript_biotype "protein_coding";
1	ena	gene	57882	59000	.	+	.	gene_id "CNAG_12002"; gene_name "CNAG_12002"; gene_source "ena"; gene_biotype "ncRNA";
1	ena	transcript	57882	59000	.	+	.	gene_id "CNAG_12002"; transcript_id "CNAG_12002-1"; gene_name "CNAG_12002"; gene_source "ena"; gene_biotype "ncRNA"; transcript_name "CNAG_12002"; transcript_source "ena"; transcript_biotype "ncRNA";
1	ena	exon	57882	59000	.	+	.	gene_id "CNAG_12002"; transcript_id "CNAG_12002-1"; exon_number "1"; gene_name "CNAG_12002"; gene_source "ena"; gene_biotype "ncRNA"; transcript_name "CNAG_12002"; transcript_source "ena"; transcript_biotype "ncRNA"; exon_id "CNAG_12002-1-1";
1	ena	gene	59175	62003	.	+	.	gene_id "CNAG_00018"; gene_source "ena"; gene_biotype "protein_coding";
1	ena	transcript	59175	62003	.	+	.	gene_id "CNAG_00018"; transcript_id "AFR92156"; gene_source "ena"; gene_biotype "protein_coding"; transcript_source "ena"; transcript_biotype "protein_coding";
1	ena	exon	59175	60802	.	+	.	gene_id "CNAG_00018"; transcript_id "AFR92156"; exon_number "1"; gene_source "ena"; gene_biotype "protein_coding"; transcript_source "ena"; transcript_biotype "protein_coding"; exon_id "AFR92156-1";
1	ena	CDS	59229	60802	.	+	0	gene_id "CNAG_00018"; transcript_id "AFR92156"; exon_number "1"; gene_source "ena"; gene_biotype "protein_coding"; transcript_source "ena"; transcript_biotype "protein_coding"; protein_id "AFR92156"; protein_version "1";
1	ena	start_codon	59229	59231	.	+	0	gene_id "CNAG_00018"; transcript_id "AFR92156"; exon_number "1"; gene_source "ena"; gene_biotype "protein_coding"; transcript_source "ena"; transcript_biotype "protein_coding";
1	ena	exon	60863	60918	.	+	.	gene_id "CNAG_00018"; transcript_id "AFR92156"; exon_number "2"; gene_source "ena"; gene_biotype "protein_coding"; transcript_source "ena"; transcript_biotype "protein_coding"; exon_id "AFR92156-2";
1	ena	CDS	60863	60918	.	+	1	gene_id "CNAG_00018"; transcript_id "AFR92156"; exon_number "2"; gene_source "ena"; gene_biotype "protein_coding"; transcript_source "ena"; transcript_biotype "protein_coding"; protein_id "AFR92156"; protein_version "1";
1	ena	exon	60983	61322	.	+	.	gene_id "CNAG_00018"; transcript_id "AFR92156"; exon_number "3"; gene_source "ena"; gene_biotype "protein_coding"; transcript_source "ena"; transcript_biotype "protein_coding"; exon_id "AFR92156-3";
1	ena	CDS	60983	61322	.	+	2	gene_id "CNAG_00018"; transcript_id "AFR92156"; exon_number "3"; gene_source "ena"; gene_biotype "protein_coding"; transcript_source "ena"; transcript_biotype "protein_coding"; protein_id "AFR92156"; protein_version "1";
1	ena	exon	61387	61535	.	+	.	gene_id "CNAG_00018"; transcript_id "AFR92156"; exon_number "4"; gene_source "ena"; gene_biotype "protein_coding"; transcript_source "ena"; transcript_biotype "protein_coding"; exon_id "AFR92156-4";
1	ena	CDS	61387	61535	.	+	1	gene_id "CNAG_00018"; transcript_id "AFR92156"; exon_number "4"; gene_source "ena"; gene_biotype "protein_coding"; transcript_source "ena"; transcript_biotype "protein_coding"; protein_id "AFR92156"; protein_version "1";
1	ena	exon	61594	62003	.	+	.	gene_id "CNAG_00018"; transcript_id "AFR92156"; exon_number "5"; gene_source "ena"; gene_biotype "protein_coding"; transcript_source "ena"; transcript_biotype "protein_coding"; exon_id "AFR92156-5";
1	ena	CDS	61594	61862	.	+	2	gene_id "CNAG_00018"; transcript_id "AFR92156"; exon_number "5"; gene_source "ena"; gene_biotype "protein_coding"; transcript_source "ena"; transcript_biotype "protein_coding"; protein_id "AFR92156"; protein_version "1";
1	ena	stop_codon	61863	61865	.	+	0	gene_id "CNAG_00018"; transcript_id "AFR92156"; exon_number "5"; gene_source "ena"; gene_biotype "protein_coding"; transcript_source "ena"; transcript_biotype "protein_coding";
1	ena	five_prime_utr	59175	59228	.	+	.	gene_id "CNAG_00018"; transcript_id "AFR92156"; gene_source "ena"; gene_biotype "protein_coding"; transcript_source "ena"; transcript_biotype "protein_coding";
1	ena	three_prime_utr	61866	62003	.	+	.	gene_id "CNAG_00018"; transcript_id "AFR92156"; gene_source "ena"; gene_biotype "protein_coding"; transcript_source "ena"; transcript_biotype "protein_coding";
1	ena	gene	61893	62653	.	-	.	gene_id "CNAG_00019"; gene_source "ena"; gene_biotype "protein_coding";
1	ena	transcript	61893	62653	.	-	.	gene_id "CNAG_00019"; transcript_id "AFR92157"; gene_source "ena"; gene_biotype "protein_coding"; transcript_source "ena"; transcript_biotype "protein_coding";
1	ena	exon	62254	62653	.	-	.	gene_id "CNAG_00019"; transcript_id "AFR92157"; exon_number "1"; gene_source "ena"; gene_biotype "protein_coding"; transcript_source "ena"; transcript_biotype "protein_coding"; exon_id "AFR92157-1";
1	ena	CDS	62254	62415	.	-	0	gene_id "CNAG_00019"; transcript_id "AFR92157"; exon_number "1"; gene_source "ena"; gene_biotype "protein_coding"; transcript_source "ena"; transcript_biotype "protein_coding"; protein_id "AFR92157"; protein_version "1";
1	ena	start_codon	62413	62415	.	-	0	gene_id "CNAG_00019"; transcript_id "AFR92157"; exon_number "1"; gene_source "ena"; gene_biotype "protein_coding"; transcript_source "ena"; transcript_biotype "protein_coding";
1	ena	exon	62123	62204	.	-	.	gene_id "CNAG_00019"; transcript_id "AFR92157"; exon_number "2"; gene_source "ena"; gene_biotype "protein_coding"; transcript_source "ena"; transcript_biotype "protein_coding"; exon_id "AFR92157-2";
1	ena	CDS	62123	62204	.	-	0	gene_id "CNAG_00019"; transcript_id "AFR92157"; exon_number "2"; gene_source "ena"; gene_biotype "protein_coding"; transcript_source "ena"; transcript_biotype "protein_coding"; protein_id "AFR92157"; protein_version "1";
1	ena	exon	61893	62058	.	-	.	gene_id "CNAG_00019"; transcript_id "AFR92157"; exon_number "3"; gene_source "ena"; gene_biotype "protein_coding"; transcript_source "ena"; transcript_biotype "protein_coding"; exon_id "AFR92157-3";
1	ena	CDS	62033	62058	.	-	2	gene_id "CNAG_00019"; transcript_id "AFR92157"; exon_number "3"; gene_source "ena"; gene_biotype "protein_coding"; transcript_source "ena"; transcript_biotype "protein_coding"; protein_id "AFR92157"; protein_version "1";
1	ena	five_prime_utr	62416	62653	.	-	.	gene_id "CNAG_00019"; transcript_id "AFR92157"; gene_source "ena"; gene_biotype "protein_coding"; transcript_source "ena"; transcript_biotype "protein_coding";
1	ena	three_prime_utr	61893	62032	.	-	.	gene_id "CNAG_00019"; transcript_id "AFR92157"; gene_source "ena"; gene_biotype "protein_coding"; transcript_source "ena"; transcript_biotype "protein_coding";
1	ena	gene	62576	66485	.	+	.	gene_id "CNAG_00020"; gene_source "ena"; gene_biotype "protein_coding";
1	ena	transcript	62576	66485	.	+	.	gene_id "CNAG_00020"; transcript_id "AFR92158"; gene_source "ena"; gene_biotype "protein_coding"; transcript_source "ena"; transcript_biotype "protein_coding";
1	ena	exon	62576	63394	.	+	.	gene_id "CNAG_00020"; transcript_id "AFR92158"; exon_number "1"; gene_source "ena"; gene_biotype "protein_coding"; transcript_source "ena"; transcript_biotype "protein_coding"; exon_id "AFR92158-1";
1	ena	CDS	62588	63394	.	+	0	gene_id "CNAG_00020"; transcript_id "AFR92158"; exon_number "1"; gene_source "ena"; gene_biotype "protein_coding"; transcript_source "ena"; transcript_biotype "protein_coding"; protein_id "AFR92158"; protein_version "1";
1	ena	start_codon	62588	62590	.	+	0	gene_id "CNAG_00020"; transcript_id "AFR92158"; exon_number "1"; gene_source "ena"; gene_biotype "protein_coding"; transcript_source "ena"; transcript_biotype "protein_coding";
1	ena	exon	63449	63533	.	+	.	gene_id "CNAG_00020"; transcript_id "AFR92158"; exon_number "2"; gene_source "ena"; gene_biotype "protein_coding"; transcript_source "ena"; transcript_biotype "protein_coding"; exon_id "AFR92158-2";
1	ena	CDS	63449	63533	.	+	0	gene_id "CNAG_00020"; transcript_id "AFR92158"; exon_number "2"; gene_source "ena"; gene_biotype "protein_coding"; transcript_source "ena"; transcript_biotype "protein_coding"; protein_id "AFR92158"; protein_version "1";
1	ena	exon	63583	63995	.	+	.	gene_id "CNAG_00020"; transcript_id "AFR92158"; exon_number "3"; gene_source "ena"; gene_biotype "protein_coding"; transcript_source "ena"; transcript_biotype "protein_coding"; exon_id "AFR92158-3";
1	ena	CDS	63583	63995	.	+	2	gene_id "CNAG_00020"; transcript_id "AFR92158"; exon_number "3"; gene_source "ena"; gene_biotype "protein_coding"; transcript_source "ena"; transcript_biotype "protein_coding"; protein_id "AFR92158"; protein_version "1";
1	ena	exon	64054	64192	.	+	.	gene_id "CNAG_00020"; transcript_id "AFR92158"; exon_number "4"; gene_source "ena"; gene_biotype "protein_coding"; transcript_source "ena"; transcript_biotype "protein_coding"; exon_id "AFR92158-4";
1	ena	CDS	64054	64192	.	+	0	gene_id "CNAG_00020"; transcript_id "AFR92158"; exon_number "4"; gene_source "ena"; gene_biotype "protein_coding"; transcript_source "ena"; transcript_biotype "protein_coding"; protein_id "AFR92158"; protein_version "1";
1	ena	exon	64249	64377	.	+	.	gene_id "CNAG_00020"; transcript_id "AFR92158"; exon_number "5"; gene_source "ena"; gene_biotype "protein_coding"; transcript_source "ena"; transcript_biotype "protein_coding"; exon_id "AFR92158-5";
1	ena	CDS	64249	64377	.	+	2	gene_id "CNAG_00020"; transcript_id "AFR92158"; exon_number "5"; gene_source "ena"; gene_biotype "protein_coding"; transcript_source "ena"; transcript_biotype "protein_coding"; protein_id "AFR92158"; protein_version "1";
1	ena	exon	64446	64594	.	+	.	gene_id "CNAG_00020"; transcript_id "AFR92158"; exon_number "6"; gene_source "ena"; gene_biotype "protein_coding"; transcript_source "ena"; transcript_biotype "protein_coding"; exon_id "AFR92158-6";
1	ena	CDS	64446	64594	.	+	2	gene_id "CNAG_00020"; transcript_id "AFR92158"; exon_number "6"; gene_source "ena"; gene_biotype "protein_coding"; transcript_source "ena"; transcript_biotype "protein_coding"; protein_id "AFR92158"; protein_version "1";
1	ena	exon	64656	64852	.	+	.	gene_id "CNAG_00020"; transcript_id "AFR92158"; exon_number "7"; gene_source "ena"; gene_biotype "protein_coding"; transcript_source "ena"; transcript_biotype "protein_coding"; exon_id "AFR92158-7";
1	ena	CDS	64656	64852	.	+	0	gene_id "CNAG_00020"; transcript_id "AFR92158"; exon_number "7"; gene_source "ena"; gene_biotype "protein_coding"; transcript_source "ena"; transcript_biotype "protein_coding"; protein_id "AFR92158"; protein_version "1";
1	ena	exon	64914	65074	.	+	.	gene_id "CNAG_00020"; transcript_id "AFR92158"; exon_number "8"; gene_source "ena"; gene_biotype "protein_coding"; transcript_source "ena"; transcript_biotype "protein_coding"; exon_id "AFR92158-8";
1	ena	CDS	64914	65074	.	+	1	gene_id "CNAG_00020"; transcript_id "AFR92158"; exon_number "8"; gene_source "ena"; gene_biotype "protein_coding"; transcript_source "ena"; transcript_biotype "protein_coding"; protein_id "AFR92158"; protein_version "1";
1	ena	exon	65144	65705	.	+	.	gene_id "CNAG_00020"; transcript_id "AFR92158"; exon_number "9"; gene_source "ena"; gene_biotype "protein_coding"; transcript_source "ena"; transcript_biotype "protein_coding"; exon_id "AFR92158-9";
1	ena	CDS	65144	65705	.	+	2	gene_id "CNAG_00020"; transcript_id "AFR92158"; exon_number "9"; gene_source "ena"; gene_biotype "protein_coding"; transcript_source "ena"; transcript_biotype "protein_coding"; protein_id "AFR92158"; protein_version "1";
1	ena	exon	65800	65968	.	+	.	gene_id "CNAG_00020"; transcript_id "AFR92158"; exon_number "10"; gene_source "ena"; gene_biotype "protein_coding"; transcript_source "ena"; transcript_biotype "protein_coding"; exon_id "AFR92158-10";
1	ena	CDS	65800	65968	.	+	1	gene_id "CNAG_00020"; transcript_id "AFR92158"; exon_number "10"; gene_source "ena"; gene_biotype "protein_coding"; transcript_source "ena"; transcript_biotype "protein_coding"; protein_id "AFR92158"; protein_version "1";
1	ena	exon	66039	66485	.	+	.	gene_id "CNAG_00020"; transcript_id "AFR92158"; exon_number "11"; gene_source "ena"; gene_biotype "protein_coding"; transcript_source "ena"; transcript_biotype "protein_coding"; exon_id "AFR92158-11";
1	ena	CDS	66039	66218	.	+	0	gene_id "CNAG_00020"; transcript_id "AFR92158"; exon_number "11"; gene_source "ena"; gene_biotype "protein_coding"; transcript_source "ena"; transcript_biotype "protein_coding"; protein_id "AFR92158"; protein_version "1";
1	ena	stop_codon	66219	66221	.	+	0	gene_id "CNAG_00020"; transcript_id "AFR92158"; exon_number "11"; gene_source "ena"; gene_biotype "protein_coding"; transcript_source "ena"; transcript_biotype "protein_coding";
1	ena	five_prime_utr	62576	62587	.	+	.	gene_id "CNAG_00020"; transcript_id "AFR92158"; gene_source "ena"; gene_biotype "protein_coding"; transcript_source "ena"; transcript_biotype "protein_coding";
1	ena	three_prime_utr	66222	66485	.	+	.	gene_id "CNAG_00020"; transcript_id "AFR92158"; gene_source "ena"; gene_biotype "protein_coding"; transcript_source "ena"; transcript_biotype "protein_coding";
1	ena	gene	64131	66222	.	-	.	gene_id "CNAG_12003"; gene_name "CNAG_12003"; gene_source "ena"; gene_biotype "ncRNA";
1	ena	transcript	64131	66222	.	-	.	gene_id "CNAG_12003"; transcript_id "CNAG_12003-1"; gene_name "CNAG_12003"; gene_source "ena"; gene_biotype "ncRNA"; transcript_name "CNAG_12003"; transcript_source "ena"; transcript_biotype "ncRNA";
1	ena	exon	64131	66222	.	-	.	gene_id "CNAG_12003"; transcript_id "CNAG_12003-1"; exon_number "1"; gene_name "CNAG_12003"; gene_source "ena"; gene_biotype "ncRNA"; transcript_name "CNAG_12003"; transcript_source "ena"; transcript_biotype "ncRNA"; exon_id "CNAG_12003-1-1";
1	ena	gene	66591	68644	.	-	.	gene_id "CNAG_00021"; gene_source "ena"; gene_biotype "protein_coding";
1	ena	transcript	66591	68644	.	-	.	gene_id "CNAG_00021"; transcript_id "AFR92159"; gene_source "ena"; gene_biotype "protein_coding"; transcript_source "ena"; transcript_biotype "protein_coding";
1	ena	exon	68225	68644	.	-	.	gene_id "CNAG_00021"; transcript_id "AFR92159"; exon_number "1"; gene_source "ena"; gene_biotype "protein_coding"; transcript_source "ena"; transcript_biotype "protein_coding"; exon_id "AFR92159-1";
1	ena	CDS	68225	68523	.	-	0	gene_id "CNAG_00021"; transcript_id "AFR92159"; exon_number "1"; gene_source "ena"; gene_biotype "protein_coding"; transcript_source "ena"; transcript_biotype "protein_coding"; protein_id "AFR92159"; protein_version "1";
1	ena	start_codon	68521	68523	.	-	0	gene_id "CNAG_00021"; transcript_id "AFR92159"; exon_number "1"; gene_source "ena"; gene_biotype "protein_coding"; transcript_source "ena"; transcript_biotype "protein_coding";
1	ena	exon	67927	68153	.	-	.	gene_id "CNAG_00021"; transcript_id "AFR92159"; exon_number "2"; gene_source "ena"; gene_biotype "protein_coding"; transcript_source "ena"; transcript_biotype "protein_coding"; exon_id "AFR92159-2";
1	ena	CDS	67927	68153	.	-	1	gene_id "CNAG_00021"; transcript_id "AFR92159"; exon_number "2"; gene_source "ena"; gene_biotype "protein_coding"; transcript_source "ena"; transcript_biotype "protein_coding"; protein_id "AFR92159"; protein_version "1";
1	ena	exon	66591	67825	.	-	.	gene_id "CNAG_00021"; transcript_id "AFR92159"; exon_number "3"; gene_source "ena"; gene_biotype "protein_coding"; transcript_source "ena"; transcript_biotype "protein_coding"; exon_id "AFR92159-3";
1	ena	CDS	66951	67825	.	-	2	gene_id "CNAG_00021"; transcript_id "AFR92159"; exon_number "3"; gene_source "ena"; gene_biotype "protein_coding"; transcript_source "ena"; transcript_biotype "protein_coding"; protein_id "AFR92159"; protein_version "1";
1	ena	stop_codon	66948	66950	.	-	0	gene_id "CNAG_00021"; transcript_id "AFR92159"; exon_number "3"; gene_source "ena"; gene_biotype "protein_coding"; transcript_source "ena"; transcript_biotype "protein_coding";
1	ena	five_prime_utr	68524	68644	.	-	.	gene_id "CNAG_00021"; transcript_id "AFR92159"; gene_source "ena"; gene_biotype "protein_coding"; transcript_source "ena"; transcript_biotype "protein_coding";
1	ena	three_prime_utr	66591	66947	.	-	.	gene_id "CNAG_00021"; transcript_id "AFR92159"; gene_source "ena"; gene_biotype "protein_coding"; transcript_source "ena"; transcript_biotype "protein_coding";
1	ena	gene	66800	67922	.	+	.	gene_id "CNAG_12004"; gene_name "CNAG_12004"; gene_source "ena"; gene_biotype "ncRNA";
1	ena	transcript	66800	67922	.	+	.	gene_id "CNAG_12004"; transcript_id "CNAG_12004-1"; gene_name "CNAG_12004"; gene_source "ena"; gene_biotype "ncRNA"; transcript_name "CNAG_12004"; transcript_source "ena"; transcript_biotype "ncRNA";
1	ena	exon	66800	67922	.	+	.	gene_id "CNAG_12004"; transcript_id "CNAG_12004-1"; exon_number "1"; gene_name "CNAG_12004"; gene_source "ena"; gene_biotype "ncRNA"; transcript_name "CNAG_12004"; transcript_source "ena"; transcript_biotype "ncRNA"; exon_id "CNAG_12004-1-1";
1	ena	gene	68921	70167	.	-	.	gene_id "CNAG_00022"; gene_source "ena"; gene_biotype "protein_coding";
1	ena	transcript	68921	70167	.	-	.	gene_id "CNAG_00022"; transcript_id "AFR92160"; gene_source "ena"; gene_biotype "protein_coding"; transcript_source "ena"; transcript_biotype "protein_coding";
1	ena	exon	69507	70167	.	-	.	gene_id "CNAG_00022"; transcript_id "AFR92160"; exon_number "1"; gene_source "ena"; gene_biotype "protein_coding"; transcript_source "ena"; transcript_biotype "protein_coding"; exon_id "AFR92160-1";
1	ena	CDS	69507	70126	.	-	0	gene_id "CNAG_00022"; transcript_id "AFR92160"; exon_number "1"; gene_source "ena"; gene_biotype "protein_coding"; transcript_source "ena"; transcript_biotype "protein_coding"; protein_id "AFR92160"; protein_version "1";
1	ena	start_codon	70124	70126	.	-	0	gene_id "CNAG_00022"; transcript_id "AFR92160"; exon_number "1"; gene_source "ena"; gene_biotype "protein_coding"; transcript_source "ena"; transcript_biotype "protein_coding";
1	ena	exon	68921	69351	.	-	.	gene_id "CNAG_00022"; transcript_id "AFR92160"; exon_number "2"; gene_source "ena"; gene_biotype "protein_coding"; transcript_source "ena"; transcript_biotype "protein_coding"; exon_id "AFR92160-2";
1	ena	CDS	69162	69351	.	-	1	gene_id "CNAG_00022"; transcript_id "AFR92160"; exon_number "2"; gene_source "ena"; gene_biotype "protein_coding"; transcript_source "ena"; transcript_biotype "protein_coding"; protein_id "AFR92160"; protein_version "1";
1	ena	five_prime_utr	70127	70167	.	-	.	gene_id "CNAG_00022"; transcript_id "AFR92160"; gene_source "ena"; gene_biotype "protein_coding"; transcript_source "ena"; transcript_biotype "protein_coding";
1	ena	three_prime_utr	68921	69161	.	-	.	gene_id "CNAG_00022"; transcript_id "AFR92160"; gene_source "ena"; gene_biotype "protein_coding"; transcript_source "ena"; transcript_biotype "protein_coding";
1	ena	gene	70281	71992	.	-	.	gene_id "CNAG_00023"; gene_source "ena"; gene_biotype "protein_coding";
1	ena	transcript	70281	71992	.	-	.	gene_id "CNAG_00023"; transcript_id "AFR92161"; gene_source "ena"; gene_biotype "protein_coding"; transcript_source "ena"; transcript_biotype "protein_coding";
1	ena	exon	70943	71992	.	-	.	gene_id "CNAG_00023"; transcript_id "AFR92161"; exon_number "1"; gene_source "ena"; gene_biotype "protein_coding"; transcript_source "ena"; transcript_biotype "protein_coding"; exon_id "AFR92161-1";
1	ena	CDS	70943	71659	.	-	0	gene_id "CNAG_00023"; transcript_id "AFR92161"; exon_number "1"; gene_source "ena"; gene_biotype "protein_coding"; transcript_source "ena"; transcript_biotype "protein_coding"; protein_id "AFR92161"; protein_version "1";
1	ena	start_codon	71657	71659	.	-	0	gene_id "CNAG_00023"; transcript_id "AFR92161"; exon_number "1"; gene_source "ena"; gene_biotype "protein_coding"; transcript_source "ena"; transcript_biotype "protein_coding";
1	ena	exon	70675	70874	.	-	.	gene_id "CNAG_00023"; transcript_id "AFR92161"; exon_number "2"; gene_source "ena"; gene_biotype "protein_coding"; transcript_source "ena"; transcript_biotype "protein_coding"; exon_id "AFR92161-2";
1	ena	CDS	70675	70874	.	-	0	gene_id "CNAG_00023"; transcript_id "AFR92161"; exon_number "2"; gene_source "ena"; gene_biotype "protein_coding"; transcript_source "ena"; transcript_biotype "protein_coding"; protein_id "AFR92161"; protein_version "1";
1	ena	exon	70281	70606	.	-	.	gene_id "CNAG_00023"; transcript_id "AFR92161"; exon_number "3"; gene_source "ena"; gene_biotype "protein_coding"; transcript_source "ena"; transcript_biotype "protein_coding"; exon_id "AFR92161-3";
1	ena	CDS	70438	70606	.	-	1	gene_id "CNAG_00023"; transcript_id "AFR92161"; exon_number "3"; gene_source "ena"; gene_biotype "protein_coding"; transcript_source "ena"; transcript_biotype "protein_coding"; protein_id "AFR92161"; protein_version "1";
1	ena	five_prime_utr	71660	71992	.	-	.	gene_id "CNAG_00023"; transcript_id "AFR92161"; gene_source "ena"; gene_biotype "protein_coding"; transcript_source "ena"; transcript_biotype "protein_coding";
1	ena	three_prime_utr	70281	70437	.	-	.	gene_id "CNAG_00023"; transcript_id "AFR92161"; gene_source "ena"; gene_biotype "protein_coding"; transcript_source "ena"; transcript_biotype "protein_coding";
1	ena	gene	73454	77666	.	+	.	gene_id "CNAG_00024"; gene_source "ena"; gene_biotype "protein_coding";
1	ena	transcript	73454	77666	.	+	.	gene_id "CNAG_00024"; transcript_id "AGV15258"; gene_source "ena"; gene_biotype "protein_coding"; transcript_source "ena"; transcript_biotype "protein_coding";
1	ena	exon	73454	74507	.	+	.	gene_id "CNAG_00024"; transcript_id "AGV15258"; exon_number "1"; gene_source "ena"; gene_biotype "protein_coding"; transcript_source "ena"; transcript_biotype "protein_coding"; exon_id "AFR92162-1";
1	ena	CDS	74340	74507	.	+	0	gene_id "CNAG_00024"; transcript_id "AGV15258"; exon_number "1"; gene_source "ena"; gene_biotype "protein_coding"; transcript_source "ena"; transcript_biotype "protein_coding"; protein_id "AGV15258"; protein_version "1";
1	ena	start_codon	74340	74342	.	+	0	gene_id "CNAG_00024"; transcript_id "AGV15258"; exon_number "1"; gene_source "ena"; gene_biotype "protein_coding"; transcript_source "ena"; transcript_biotype "protein_coding";
1	ena	exon	74655	74974	.	+	.	gene_id "CNAG_00024"; transcript_id "AGV15258"; exon_number "2"; gene_source "ena"; gene_biotype "protein_coding"; transcript_source "ena"; transcript_biotype "protein_coding"; exon_id "AGV15258-2";
1	ena	CDS	74655	74974	.	+	0	gene_id "CNAG_00024"; transcript_id "AGV15258"; exon_number "2"; gene_source "ena"; gene_biotype "protein_coding"; transcript_source "ena"; transcript_biotype "protein_coding"; protein_id "AGV15258"; protein_version "1";
1	ena	exon	75035	75646	.	+	.	gene_id "CNAG_00024"; transcript_id "AGV15258"; exon_number "3"; gene_source "ena"; gene_biotype "protein_coding"; transcript_source "ena"; transcript_biotype "protein_coding"; exon_id "AGV15258-3";
1	ena	CDS	75035	75646	.	+	1	gene_id "CNAG_00024"; transcript_id "AGV15258"; exon_number "3"; gene_source "ena"; gene_biotype "protein_coding"; transcript_source "ena"; transcript_biotype "protein_coding"; protein_id "AGV15258"; protein_version "1";
1	ena	exon	75701	77666	.	+	.	gene_id "CNAG_00024"; transcript_id "AGV15258"; exon_number "4"; gene_source "ena"; gene_biotype "protein_coding"; transcript_source "ena"; transcript_biotype "protein_coding"; exon_id "AGV15258-4";
1	ena	CDS	75701	76757	.	+	1	gene_id "CNAG_00024"; transcript_id "AGV15258"; exon_number "4"; gene_source "ena"; gene_biotype "protein_coding"; transcript_source "ena"; transcript_biotype "protein_coding"; protein_id "AGV15258"; protein_version "1";
1	ena	stop_codon	76758	76760	.	+	0	gene_id "CNAG_00024"; transcript_id "AGV15258"; exon_number "4"; gene_source "ena"; gene_biotype "protein_coding"; transcript_source "ena"; transcript_biotype "protein_coding";
1	ena	five_prime_utr	73454	74339	.	+	.	gene_id "CNAG_00024"; transcript_id "AGV15258"; gene_source "ena"; gene_biotype "protein_coding"; transcript_source "ena"; transcript_biotype "protein_coding";
1	ena	three_prime_utr	76761	77666	.	+	.	gene_id "CNAG_00024"; transcript_id "AGV15258"; gene_source "ena"; gene_biotype "protein_coding"; transcript_source "ena"; transcript_biotype "protein_coding";
1	ena	transcript	73454	77666	.	+	.	gene_id "CNAG_00024"; transcript_id "AFR92162"; gene_source "ena"; gene_biotype "protein_coding"; transcript_source "ena"; transcript_biotype "protein_coding";
1	ena	exon	73454	74507	.	+	.	gene_id "CNAG_00024"; transcript_id "AFR92162"; exon_number "1"; gene_source "ena"; gene_biotype "protein_coding"; transcript_source "ena"; transcript_biotype "protein_coding"; exon_id "AFR92162-1";
1	ena	CDS	74340	74507	.	+	0	gene_id "CNAG_00024"; transcript_id "AFR92162"; exon_number "1"; gene_source "ena"; gene_biotype "protein_coding"; transcript_source "ena"; transcript_biotype "protein_coding"; protein_id "AFR92162"; protein_version "1";
1	ena	start_codon	74340	74342	.	+	0	gene_id "CNAG_00024"; transcript_id "AFR92162"; exon_number "1"; gene_source "ena"; gene_biotype "protein_coding"; transcript_source "ena"; transcript_biotype "protein_coding";
1	ena	exon	74655	75646	.	+	.	gene_id "CNAG_00024"; transcript_id "AFR92162"; exon_number "2"; gene_source "ena"; gene_biotype "protein_coding"; transcript_source "ena"; transcript_biotype "protein_coding"; exon_id "AFR92162-2";
1	ena	CDS	74655	75646	.	+	0	gene_id "CNAG_00024"; transcript_id "AFR92162"; exon_number "2"; gene_source "ena"; gene_biotype "protein_coding"; transcript_source "ena"; transcript_biotype "protein_coding"; protein_id "AFR92162"; protein_version "1";
1	ena	exon	75701	76735	.	+	.	gene_id "CNAG_00024"; transcript_id "AFR92162"; exon_number "3"; gene_source "ena"; gene_biotype "protein_coding"; transcript_source "ena"; transcript_biotype "protein_coding"; exon_id "AFR92162-3";
1	ena	CDS	75701	76735	.	+	1	gene_id "CNAG_00024"; transcript_id "AFR92162"; exon_number "3"; gene_source "ena"; gene_biotype "protein_coding"; transcript_source "ena"; transcript_biotype "protein_coding"; protein_id "AFR92162"; protein_version "1";
1	ena	exon	76814	77666	.	+	.	gene_id "CNAG_00024"; transcript_id "AFR92162"; exon_number "4"; gene_source "ena"; gene_biotype "protein_coding"; transcript_source "ena"; transcript_biotype "protein_coding"; exon_id "AFR92162-4";
1	ena	CDS	76814	76868	.	+	1	gene_id "CNAG_00024"; transcript_id "AFR92162"; exon_number "4"; gene_source "ena"; gene_biotype "protein_coding"; transcript_source "ena"; transcript_biotype "protein_coding"; protein_id "AFR92162"; protein_version "1";
1	ena	stop_codon	76869	76871	.	+	0	gene_id "CNAG_00024"; transcript_id "AFR92162"; exon_number "4"; gene_source "ena"; gene_biotype "protein_coding"; transcript_source "ena"; transcript_biotype "protein_coding";
1	ena	five_prime_utr	73454	74339	.	+	.	gene_id "CNAG_00024"; transcript_id "AFR92162"; gene_source "ena"; gene_biotype "protein_coding"; transcript_source "ena"; transcript_biotype "protein_coding";
1	ena	three_prime_utr	76872	77666	.	+	.	gene_id "CNAG_00024"; transcript_id "AFR92162"; gene_source "ena"; gene_biotype "protein_coding"; transcript_source "ena"; transcript_biotype "protein_coding";
1	ena	transcript	74340	76760	.	+	.	gene_id "CNAG_00024"; transcript_id "AGV15257"; gene_source "ena"; gene_biotype "protein_coding"; transcript_source "ena"; transcript_biotype "protein_coding";
1	ena	exon	74340	74507	.	+	.	gene_id "CNAG_00024"; transcript_id "AGV15257"; exon_number "1"; gene_source "ena"; gene_biotype "protein_coding"; transcript_source "ena"; transcript_biotype "protein_coding"; exon_id "AGV15257-1";
1	ena	CDS	74340	74507	.	+	0	gene_id "CNAG_00024"; transcript_id "AGV15257"; exon_number "1"; gene_source "ena"; gene_biotype "protein_coding"; transcript_source "ena"; transcript_biotype "protein_coding"; protein_id "AGV15257"; protein_version "1";
1	ena	start_codon	74340	74342	.	+	0	gene_id "CNAG_00024"; transcript_id "AGV15257"; exon_number "1"; gene_source "ena"; gene_biotype "protein_coding"; transcript_source "ena"; transcript_biotype "protein_coding";
1	ena	exon	74655	75646	.	+	.	gene_id "CNAG_00024"; transcript_id "AGV15257"; exon_number "2"; gene_source "ena"; gene_biotype "protein_coding"; transcript_source "ena"; transcript_biotype "protein_coding"; exon_id "AFR92162-2";
1	ena	CDS	74655	75646	.	+	0	gene_id "CNAG_00024"; transcript_id "AGV15257"; exon_number "2"; gene_source "ena"; gene_biotype "protein_coding"; transcript_source "ena"; transcript_biotype "protein_coding"; protein_id "AGV15257"; protein_version "1";
1	ena	exon	75701	76760	.	+	.	gene_id "CNAG_00024"; transcript_id "AGV15257"; exon_number "3"; gene_source "ena"; gene_biotype "protein_coding"; transcript_source "ena"; transcript_biotype "protein_coding"; exon_id "AGV15257-3";
1	ena	CDS	75701	76757	.	+	1	gene_id "CNAG_00024"; transcript_id "AGV15257"; exon_number "3"; gene_source "ena"; gene_biotype "protein_coding"; transcript_source "ena"; transcript_biotype "protein_coding"; protein_id "AGV15257"; protein_version "1";
1	ena	stop_codon	76758	76760	.	+	0	gene_id "CNAG_00024"; transcript_id "AGV15257"; exon_number "3"; gene_source "ena"; gene_biotype "protein_coding"; transcript_source "ena"; transcript_biotype "protein_coding";
1	ena	gene	77175	80898	.	-	.	gene_id "CNAG_00025"; gene_source "ena"; gene_biotype "protein_coding";
1	ena	transcript	77175	80898	.	-	.	gene_id "CNAG_00025"; transcript_id "AGV15259"; gene_source "ena"; gene_biotype "protein_coding"; transcript_source "ena"; transcript_biotype "protein_coding";
1	ena	exon	80622	80898	.	-	.	gene_id "CNAG_00025"; transcript_id "AGV15259"; exon_number "1"; gene_source "ena"; gene_biotype "protein_coding"; transcript_source "ena"; transcript_biotype "protein_coding"; exon_id "AGV15259-1";
1	ena	CDS	80622	80634	.	-	0	gene_id "CNAG_00025"; transcript_id "AGV15259"; exon_number "1"; gene_source "ena"; gene_biotype "protein_coding"; transcript_source "ena"; transcript_biotype "protein_coding"; protein_id "AGV15259"; protein_version "1";
1	ena	start_codon	80632	80634	.	-	0	gene_id "CNAG_00025"; transcript_id "AGV15259"; exon_number "1"; gene_source "ena"; gene_biotype "protein_coding"; transcript_source "ena"; transcript_biotype "protein_coding";
1	ena	exon	80153	80546	.	-	.	gene_id "CNAG_00025"; transcript_id "AGV15259"; exon_number "2"; gene_source "ena"; gene_biotype "protein_coding"; transcript_source "ena"; transcript_biotype "protein_coding"; exon_id "AGV15259-2";
1	ena	CDS	80153	80546	.	-	2	gene_id "CNAG_00025"; transcript_id "AGV15259"; exon_number "2"; gene_source "ena"; gene_biotype "protein_coding"; transcript_source "ena"; transcript_biotype "protein_coding"; protein_id "AGV15259"; protein_version "1";
1	ena	exon	79851	80100	.	-	.	gene_id "CNAG_00025"; transcript_id "AGV15259"; exon_number "3"; gene_source "ena"; gene_biotype "protein_coding"; transcript_source "ena"; transcript_biotype "protein_coding"; exon_id "AGV15259-3";
1	ena	CDS	79851	80100	.	-	1	gene_id "CNAG_00025"; transcript_id "AGV15259"; exon_number "3"; gene_source "ena"; gene_biotype "protein_coding"; transcript_source "ena"; transcript_biotype "protein_coding"; protein_id "AGV15259"; protein_version "1";
1	ena	exon	79463	79804	.	-	.	gene_id "CNAG_00025"; transcript_id "AGV15259"; exon_number "4"; gene_source "ena"; gene_biotype "protein_coding"; transcript_source "ena"; transcript_biotype "protein_coding"; exon_id "AGV15259-4";
1	ena	CDS	79463	79804	.	-	0	gene_id "CNAG_00025"; transcript_id "AGV15259"; exon_number "4"; gene_source "ena"; gene_biotype "protein_coding"; transcript_source "ena"; transcript_biotype "protein_coding"; protein_id "AGV15259"; protein_version "1";
1	ena	exon	79099	79404	.	-	.	gene_id "CNAG_00025"; transcript_id "AGV15259"; exon_number "5"; gene_source "ena"; gene_biotype "protein_coding"; transcript_source "ena"; transcript_biotype "protein_coding"; exon_id "AGV15259-5";
1	ena	CDS	79099	79404	.	-	0	gene_id "CNAG_00025"; transcript_id "AGV15259"; exon_number "5"; gene_source "ena"; gene_biotype "protein_coding"; transcript_source "ena"; transcript_biotype "protein_coding"; protein_id "AGV15259"; protein_version "1";
1	ena	exon	78913	79041	.	-	.	gene_id "CNAG_00025"; transcript_id "AGV15259"; exon_number "6"; gene_source "ena"; gene_biotype "protein_coding"; transcript_source "ena"; transcript_biotype "protein_coding"; exon_id "AGV15259-6";
1	ena	CDS	78913	79041	.	-	0	gene_id "CNAG_00025"; transcript_id "AGV15259"; exon_number "6"; gene_source "ena"; gene_biotype "protein_coding"; transcript_source "ena"; transcript_biotype "protein_coding"; protein_id "AGV15259"; protein_version "1";
1	ena	exon	78766	78843	.	-	.	gene_id "CNAG_00025"; transcript_id "AGV15259"; exon_number "7"; gene_source "ena"; gene_biotype "protein_coding"; transcript_source "ena"; transcript_biotype "protein_coding"; exon_id "AGV15259-7";
1	ena	CDS	78766	78843	.	-	0	gene_id "CNAG_00025"; transcript_id "AGV15259"; exon_number "7"; gene_source "ena"; gene_biotype "protein_coding"; transcript_source "ena"; transcript_biotype "protein_coding"; protein_id "AGV15259"; protein_version "1";
1	ena	exon	78612	78705	.	-	.	gene_id "CNAG_00025"; transcript_id "AGV15259"; exon_number "8"; gene_source "ena"; gene_biotype "protein_coding"; transcript_source "ena"; transcript_biotype "protein_coding"; exon_id "AGV15259-8";
1	ena	CDS	78612	78705	.	-	0	gene_id "CNAG_00025"; transcript_id "AGV15259"; exon_number "8"; gene_source "ena"; gene_biotype "protein_coding"; transcript_source "ena"; transcript_biotype "protein_coding"; protein_id "AGV15259"; protein_version "1";
1	ena	exon	78462	78531	.	-	.	gene_id "CNAG_00025"; transcript_id "AGV15259"; exon_number "9"; gene_source "ena"; gene_biotype "protein_coding"; transcript_source "ena"; transcript_biotype "protein_coding"; exon_id "AGV15259-9";
1	ena	CDS	78462	78531	.	-	2	gene_id "CNAG_00025"; transcript_id "AGV15259"; exon_number "9"; gene_source "ena"; gene_biotype "protein_coding"; transcript_source "ena"; transcript_biotype "protein_coding"; protein_id "AGV15259"; protein_version "1";
1	ena	exon	78325	78391	.	-	.	gene_id "CNAG_00025"; transcript_id "AGV15259"; exon_number "10"; gene_source "ena"; gene_biotype "protein_coding"; transcript_source "ena"; transcript_biotype "protein_coding"; exon_id "AGV15259-10";
1	ena	CDS	78325	78391	.	-	1	gene_id "CNAG_00025"; transcript_id "AGV15259"; exon_number "10"; gene_source "ena"; gene_biotype "protein_coding"; transcript_source "ena"; transcript_biotype "protein_coding"; protein_id "AGV15259"; protein_version "1";
1	ena	exon	77175	78257	.	-	.	gene_id "CNAG_00025"; transcript_id "AGV15259"; exon_number "11"; gene_source "ena"; gene_biotype "protein_coding"; transcript_source "ena"; transcript_biotype "protein_coding"; exon_id "AGV15259-11";
1	ena	CDS	78204	78257	.	-	0	gene_id "CNAG_00025"; transcript_id "AGV15259"; exon_number "11"; gene_source "ena"; gene_biotype "protein_coding"; transcript_source "ena"; transcript_biotype "protein_coding"; protein_id "AGV15259"; protein_version "1";
1	ena	stop_codon	78201	78203	.	-	0	gene_id "CNAG_00025"; transcript_id "AGV15259"; exon_number "11"; gene_source "ena"; gene_biotype "protein_coding"; transcript_source "ena"; transcript_biotype "protein_coding";
1	ena	five_prime_utr	80635	80898	.	-	.	gene_id "CNAG_00025"; transcript_id "AGV15259"; gene_source "ena"; gene_biotype "protein_coding"; transcript_source "ena"; transcript_biotype "protein_coding";
1	ena	three_prime_utr	77175	78200	.	-	.	gene_id "CNAG_00025"; transcript_id "AGV15259"; gene_source "ena"; gene_biotype "protein_coding"; transcript_source "ena"; transcript_biotype "protein_coding";
1	ena	transcript	78201	80580	.	-	.	gene_id "CNAG_00025"; transcript_id "AFR92163"; gene_source "ena"; gene_biotype "protein_coding"; transcript_source "ena"; transcript_biotype "protein_coding";
1	ena	exon	80153	80580	.	-	.	gene_id "CNAG_00025"; transcript_id "AFR92163"; exon_number "1"; gene_source "ena"; gene_biotype "protein_coding"; transcript_source "ena"; transcript_biotype "protein_coding"; exon_id "AFR92163-1";
1	ena	CDS	80153	80580	.	-	0	gene_id "CNAG_00025"; transcript_id "AFR92163"; exon_number "1"; gene_source "ena"; gene_biotype "protein_coding"; transcript_source "ena"; transcript_biotype "protein_coding"; protein_id "AFR92163"; protein_version "1";
1	ena	start_codon	80578	80580	.	-	0	gene_id "CNAG_00025"; transcript_id "AFR92163"; exon_number "1"; gene_source "ena"; gene_biotype "protein_coding"; transcript_source "ena"; transcript_biotype "protein_coding";
1	ena	exon	79851	80100	.	-	.	gene_id "CNAG_00025"; transcript_id "AFR92163"; exon_number "2"; gene_source "ena"; gene_biotype "protein_coding"; transcript_source "ena"; transcript_biotype "protein_coding"; exon_id "AGV15259-3";
1	ena	CDS	79851	80100	.	-	1	gene_id "CNAG_00025"; transcript_id "AFR92163"; exon_number "2"; gene_source "ena"; gene_biotype "protein_coding"; transcript_source "ena"; transcript_biotype "protein_coding"; protein_id "AFR92163"; protein_version "1";
1	ena	exon	79463	79804	.	-	.	gene_id "CNAG_00025"; transcript_id "AFR92163"; exon_number "3"; gene_source "ena"; gene_biotype "protein_coding"; transcript_source "ena"; transcript_biotype "protein_coding"; exon_id "AGV15259-4";
1	ena	CDS	79463	79804	.	-	0	gene_id "CNAG_00025"; transcript_id "AFR92163"; exon_number "3"; gene_source "ena"; gene_biotype "protein_coding"; transcript_source "ena"; transcript_biotype "protein_coding"; protein_id "AFR92163"; protein_version "1";
1	ena	exon	79099	79404	.	-	.	gene_id "CNAG_00025"; transcript_id "AFR92163"; exon_number "4"; gene_source "ena"; gene_biotype "protein_coding"; transcript_source "ena"; transcript_biotype "protein_coding"; exon_id "AGV15259-5";
1	ena	CDS	79099	79404	.	-	0	gene_id "CNAG_00025"; transcript_id "AFR92163"; exon_number "4"; gene_source "ena"; gene_biotype "protein_coding"; transcript_source "ena"; transcript_biotype "protein_coding"; protein_id "AFR92163"; protein_version "1";
1	ena	exon	78913	79041	.	-	.	gene_id "CNAG_00025"; transcript_id "AFR92163"; exon_number "5"; gene_source "ena"; gene_biotype "protein_coding"; transcript_source "ena"; transcript_biotype "protein_coding"; exon_id "AGV15259-6";
1	ena	CDS	78913	79041	.	-	0	gene_id "CNAG_00025"; transcript_id "AFR92163"; exon_number "5"; gene_source "ena"; gene_biotype "protein_coding"; transcript_source "ena"; transcript_biotype "protein_coding"; protein_id "AFR92163"; protein_version "1";
1	ena	exon	78766	78843	.	-	.	gene_id "CNAG_00025"; transcript_id "AFR92163"; exon_number "6"; gene_source "ena"; gene_biotype "protein_coding"; transcript_source "ena"; transcript_biotype "protein_coding"; exon_id "AGV15259-7";
1	ena	CDS	78766	78843	.	-	0	gene_id "CNAG_00025"; transcript_id "AFR92163"; exon_number "6"; gene_source "ena"; gene_biotype "protein_coding"; transcript_source "ena"; transcript_biotype "protein_coding"; protein_id "AFR92163"; protein_version "1";
1	ena	exon	78612	78705	.	-	.	gene_id "CNAG_00025"; transcript_id "AFR92163"; exon_number "7"; gene_source "ena"; gene_biotype "protein_coding"; transcript_source "ena"; transcript_biotype "protein_coding"; exon_id "AGV15259-8";
1	ena	CDS	78612	78705	.	-	0	gene_id "CNAG_00025"; transcript_id "AFR92163"; exon_number "7"; gene_source "ena"; gene_biotype "protein_coding"; transcript_source "ena"; transcript_biotype "protein_coding"; protein_id "AFR92163"; protein_version "1";
1	ena	exon	78462	78531	.	-	.	gene_id "CNAG_00025"; transcript_id "AFR92163"; exon_number "8"; gene_source "ena"; gene_biotype "protein_coding"; transcript_source "ena"; transcript_biotype "protein_coding"; exon_id "AGV15259-9";
1	ena	CDS	78462	78531	.	-	2	gene_id "CNAG_00025"; transcript_id "AFR92163"; exon_number "8"; gene_source "ena"; gene_biotype "protein_coding"; transcript_source "ena"; transcript_biotype "protein_coding"; protein_id "AFR92163"; protein_version "1";
1	ena	exon	78325	78391	.	-	.	gene_id "CNAG_00025"; transcript_id "AFR92163"; exon_number "9"; gene_source "ena"; gene_biotype "protein_coding"; transcript_source "ena"; transcript_biotype "protein_coding"; exon_id "AGV15259-10";
1	ena	CDS	78325	78391	.	-	1	gene_id "CNAG_00025"; transcript_id "AFR92163"; exon_number "9"; gene_source "ena"; gene_biotype "protein_coding"; transcript_source "ena"; transcript_biotype "protein_coding"; protein_id "AFR92163"; protein_version "1";
1	ena	exon	78201	78257	.	-	.	gene_id "CNAG_00025"; transcript_id "AFR92163"; exon_number "10"; gene_source "ena"; gene_biotype "protein_coding"; transcript_source "ena"; transcript_biotype "protein_coding"; exon_id "AFR92163-10";
1	ena	CDS	78204	78257	.	-	0	gene_id "CNAG_00025"; transcript_id "AFR92163"; exon_number "10"; gene_source "ena"; gene_biotype "protein_coding"; transcript_source "ena"; transcript_biotype "protein_coding"; protein_id "AFR92163"; protein_version "1";
1	ena	stop_codon	78201	78203	.	-	0	gene_id "CNAG_00025"; transcript_id "AFR92163"; exon_number "10"; gene_source "ena"; gene_biotype "protein_coding"; transcript_source "ena"; transcript_biotype "protein_coding";
1	ena	gene	81222	83331	.	-	.	gene_id "CNAG_00026"; gene_source "ena"; gene_biotype "protein_coding";
1	ena	transcript	81222	83331	.	-	.	gene_id "CNAG_00026"; transcript_id "AGV15260"; gene_source "ena"; gene_biotype "protein_coding"; transcript_source "ena"; transcript_biotype "protein_coding";
1	ena	exon	82805	83331	.	-	.	gene_id "CNAG_00026"; transcript_id "AGV15260"; exon_number "1"; gene_source "ena"; gene_biotype "protein_coding"; transcript_source "ena"; transcript_biotype "protein_coding"; exon_id "AGV15260-1";
1	ena	CDS	82805	82983	.	-	0	gene_id "CNAG_00026"; transcript_id "AGV15260"; exon_number "1"; gene_source "ena"; gene_biotype "protein_coding"; transcript_source "ena"; transcript_biotype "protein_coding"; protein_id "AGV15260"; protein_version "1";
1	ena	start_codon	82981	82983	.	-	0	gene_id "CNAG_00026"; transcript_id "AGV15260"; exon_number "1"; gene_source "ena"; gene_biotype "protein_coding"; transcript_source "ena"; transcript_biotype "protein_coding";
1	ena	exon	82483	82739	.	-	.	gene_id "CNAG_00026"; transcript_id "AGV15260"; exon_number "2"; gene_source "ena"; gene_biotype "protein_coding"; transcript_source "ena"; transcript_biotype "protein_coding"; exon_id "AGV15260-2";
1	ena	CDS	82483	82739	.	-	1	gene_id "CNAG_00026"; transcript_id "AGV15260"; exon_number "2"; gene_source "ena"; gene_biotype "protein_coding"; transcript_source "ena"; transcript_biotype "protein_coding"; protein_id "AGV15260"; protein_version "1";
1	ena	exon	82397	82423	.	-	.	gene_id "CNAG_00026"; transcript_id "AGV15260"; exon_number "3"; gene_source "ena"; gene_biotype "protein_coding"; transcript_source "ena"; transcript_biotype "protein_coding"; exon_id "AGV15260-3";
1	ena	CDS	82397	82423	.	-	2	gene_id "CNAG_00026"; transcript_id "AGV15260"; exon_number "3"; gene_source "ena"; gene_biotype "protein_coding"; transcript_source "ena"; transcript_biotype "protein_coding"; protein_id "AGV15260"; protein_version "1";
1	ena	exon	81968	82324	.	-	.	gene_id "CNAG_00026"; transcript_id "AGV15260"; exon_number "4"; gene_source "ena"; gene_biotype "protein_coding"; transcript_source "ena"; transcript_biotype "protein_coding"; exon_id "AGV15260-4";
1	ena	CDS	81968	82324	.	-	2	gene_id "CNAG_00026"; transcript_id "AGV15260"; exon_number "4"; gene_source "ena"; gene_biotype "protein_coding"; transcript_source "ena"; transcript_biotype "protein_coding"; protein_id "AGV15260"; protein_version "1";
1	ena	exon	81528	81898	.	-	.	gene_id "CNAG_00026"; transcript_id "AGV15260"; exon_number "5"; gene_source "ena"; gene_biotype "protein_coding"; transcript_source "ena"; transcript_biotype "protein_coding"; exon_id "AGV15260-5";
1	ena	CDS	81528	81898	.	-	2	gene_id "CNAG_00026"; transcript_id "AGV15260"; exon_number "5"; gene_source "ena"; gene_biotype "protein_coding"; transcript_source "ena"; transcript_biotype "protein_coding"; protein_id "AGV15260"; protein_version "1";
1	ena	exon	81421	81474	.	-	.	gene_id "CNAG_00026"; transcript_id "AGV15260"; exon_number "6"; gene_source "ena"; gene_biotype "protein_coding"; transcript_source "ena"; transcript_biotype "protein_coding"; exon_id "AGV15260-6";
1	ena	CDS	81421	81474	.	-	0	gene_id "CNAG_00026"; transcript_id "AGV15260"; exon_number "6"; gene_source "ena"; gene_biotype "protein_coding"; transcript_source "ena"; transcript_biotype "protein_coding"; protein_id "AGV15260"; protein_version "1";
1	ena	exon	81222	81366	.	-	.	gene_id "CNAG_00026"; transcript_id "AGV15260"; exon_number "7"; gene_source "ena"; gene_biotype "protein_coding"; transcript_source "ena"; transcript_biotype "protein_coding"; exon_id "AGV15260-7";
1	ena	CDS	81301	81366	.	-	0	gene_id "CNAG_00026"; transcript_id "AGV15260"; exon_number "7"; gene_source "ena"; gene_biotype "protein_coding"; transcript_source "ena"; transcript_biotype "protein_coding"; protein_id "AGV15260"; protein_version "1";
1	ena	five_prime_utr	82984	83331	.	-	.	gene_id "CNAG_00026"; transcript_id "AGV15260"; gene_source "ena"; gene_biotype "protein_coding"; transcript_source "ena"; transcript_biotype "protein_coding";
1	ena	three_prime_utr	81222	81300	.	-	.	gene_id "CNAG_00026"; transcript_id "AGV15260"; gene_source "ena"; gene_biotype "protein_coding"; transcript_source "ena"; transcript_biotype "protein_coding";
1	ena	transcript	81301	82983	.	-	.	gene_id "CNAG_00026"; transcript_id "AFR92164"; gene_source "ena"; gene_biotype "protein_coding"; transcript_source "ena"; transcript_biotype "protein_coding";
1	ena	exon	82805	82983	.	-	.	gene_id "CNAG_00026"; transcript_id "AFR92164"; exon_number "1"; gene_source "ena"; gene_biotype "protein_coding"; transcript_source "ena"; transcript_biotype "protein_coding"; exon_id "AFR92164-1";
1	ena	CDS	82805	82983	.	-	0	gene_id "CNAG_00026"; transcript_id "AFR92164"; exon_number "1"; gene_source "ena"; gene_biotype "protein_coding"; transcript_source "ena"; transcript_biotype "protein_coding"; protein_id "AFR92164"; protein_version "1";
1	ena	start_codon	82981	82983	.	-	0	gene_id "CNAG_00026"; transcript_id "AFR92164"; exon_number "1"; gene_source "ena"; gene_biotype "protein_coding"; transcript_source "ena"; transcript_biotype "protein_coding";
1	ena	exon	82483	82739	.	-	.	gene_id "CNAG_00026"; transcript_id "AFR92164"; exon_number "2"; gene_source "ena"; gene_biotype "protein_coding"; transcript_source "ena"; transcript_biotype "protein_coding"; exon_id "AGV15260-2";
1	ena	CDS	82483	82739	.	-	1	gene_id "CNAG_00026"; transcript_id "AFR92164"; exon_number "2"; gene_source "ena"; gene_biotype "protein_coding"; transcript_source "ena"; transcript_biotype "protein_coding"; protein_id "AFR92164"; protein_version "1";
1	ena	exon	81968	82423	.	-	.	gene_id "CNAG_00026"; transcript_id "AFR92164"; exon_number "3"; gene_source "ena"; gene_biotype "protein_coding"; transcript_source "ena"; transcript_biotype "protein_coding"; exon_id "AFR92164-3";
1	ena	CDS	81968	82423	.	-	2	gene_id "CNAG_00026"; transcript_id "AFR92164"; exon_number "3"; gene_source "ena"; gene_biotype "protein_coding"; transcript_source "ena"; transcript_biotype "protein_coding"; protein_id "AFR92164"; protein_version "1";
1	ena	exon	81528	81898	.	-	.	gene_id "CNAG_00026"; transcript_id "AFR92164"; exon_number "4"; gene_source "ena"; gene_biotype "protein_coding"; transcript_source "ena"; transcript_biotype "protein_coding"; exon_id "AGV15260-5";
1	ena	CDS	81528	81898	.	-	2	gene_id "CNAG_00026"; transcript_id "AFR92164"; exon_number "4"; gene_source "ena"; gene_biotype "protein_coding"; transcript_source "ena"; transcript_biotype "protein_coding"; protein_id "AFR92164"; protein_version "1";
1	ena	exon	81421	81474	.	-	.	gene_id "CNAG_00026"; transcript_id "AFR92164"; exon_number "5"; gene_source "ena"; gene_biotype "protein_coding"; transcript_source "ena"; transcript_biotype "protein_coding"; exon_id "AGV15260-6";
1	ena	CDS	81421	81474	.	-	0	gene_id "CNAG_00026"; transcript_id "AFR92164"; exon_number "5"; gene_source "ena"; gene_biotype "protein_coding"; transcript_source "ena"; transcript_biotype "protein_coding"; protein_id "AFR92164"; protein_version "1";
1	ena	exon	81301	81366	.	-	.	gene_id "CNAG_00026"; transcript_id "AFR92164"; exon_number "6"; gene_source "ena"; gene_biotype "protein_coding"; transcript_source "ena"; transcript_biotype "protein_coding"; exon_id "AFR92164-6";
1	ena	CDS	81304	81366	.	-	0	gene_id "CNAG_00026"; transcript_id "AFR92164"; exon_number "6"; gene_source "ena"; gene_biotype "protein_coding"; transcript_source "ena"; transcript_biotype "protein_coding"; protein_id "AFR92164"; protein_version "1";
1	ena	stop_codon	81301	81303	.	-	0	gene_id "CNAG_00026"; transcript_id "AFR92164"; exon_number "6"; gene_source "ena"; gene_biotype "protein_coding"; transcript_source "ena"; transcript_biotype "protein_coding";
1	ena	gene	83936	87837	.	+	.	gene_id "CNAG_00027"; gene_source "ena"; gene_biotype "protein_coding";
1	ena	transcript	83936	87837	.	+	.	gene_id "CNAG_00027"; transcript_id "AFR92165"; gene_source "ena"; gene_biotype "protein_coding"; transcript_source "ena"; transcript_biotype "protein_coding";
1	ena	exon	83936	84359	.	+	.	gene_id "CNAG_00027"; transcript_id "AFR92165"; exon_number "1"; gene_source "ena"; gene_biotype "protein_coding"; transcript_source "ena"; transcript_biotype "protein_coding"; exon_id "AFR92165-1";
1	ena	CDS	84072	84359	.	+	0	gene_id "CNAG_00027"; transcript_id "AFR92165"; exon_number "1"; gene_source "ena"; gene_biotype "protein_coding"; transcript_source "ena"; transcript_biotype "protein_coding"; protein_id "AFR92165"; protein_version "1";
1	ena	start_codon	84072	84074	.	+	0	gene_id "CNAG_00027"; transcript_id "AFR92165"; exon_number "1"; gene_source "ena"; gene_biotype "protein_coding"; transcript_source "ena"; transcript_biotype "protein_coding";
1	ena	exon	84417	84851	.	+	.	gene_id "CNAG_00027"; transcript_id "AFR92165"; exon_number "2"; gene_source "ena"; gene_biotype "protein_coding"; transcript_source "ena"; transcript_biotype "protein_coding"; exon_id "AFR92165-2";
1	ena	CDS	84417	84851	.	+	0	gene_id "CNAG_00027"; transcript_id "AFR92165"; exon_number "2"; gene_source "ena"; gene_biotype "protein_coding"; transcript_source "ena"; transcript_biotype "protein_coding"; protein_id "AFR92165"; protein_version "1";
1	ena	exon	84902	85540	.	+	.	gene_id "CNAG_00027"; transcript_id "AFR92165"; exon_number "3"; gene_source "ena"; gene_biotype "protein_coding"; transcript_source "ena"; transcript_biotype "protein_coding"; exon_id "AFR92165-3";
1	ena	CDS	84902	85540	.	+	0	gene_id "CNAG_00027"; transcript_id "AFR92165"; exon_number "3"; gene_source "ena"; gene_biotype "protein_coding"; transcript_source "ena"; transcript_biotype "protein_coding"; protein_id "AFR92165"; protein_version "1";
1	ena	exon	85591	85706	.	+	.	gene_id "CNAG_00027"; transcript_id "AFR92165"; exon_number "4"; gene_source "ena"; gene_biotype "protein_coding"; transcript_source "ena"; transcript_biotype "protein_coding"; exon_id "AFR92165-4";
1	ena	CDS	85591	85706	.	+	0	gene_id "CNAG_00027"; transcript_id "AFR92165"; exon_number "4"; gene_source "ena"; gene_biotype "protein_coding"; transcript_source "ena"; transcript_biotype "protein_coding"; protein_id "AFR92165"; protein_version "1";
1	ena	exon	85754	85784	.	+	.	gene_id "CNAG_00027"; transcript_id "AFR92165"; exon_number "5"; gene_source "ena"; gene_biotype "protein_coding"; transcript_source "ena"; transcript_biotype "protein_coding"; exon_id "AFR92165-5";
1	ena	CDS	85754	85784	.	+	1	gene_id "CNAG_00027"; transcript_id "AFR92165"; exon_number "5"; gene_source "ena"; gene_biotype "protein_coding"; transcript_source "ena"; transcript_biotype "protein_coding"; protein_id "AFR92165"; protein_version "1";
1	ena	exon	85839	86109	.	+	.	gene_id "CNAG_00027"; transcript_id "AFR92165"; exon_number "6"; gene_source "ena"; gene_biotype "protein_coding"; transcript_source "ena"; transcript_biotype "protein_coding"; exon_id "AFR92165-6";
1	ena	CDS	85839	86109	.	+	0	gene_id "CNAG_00027"; transcript_id "AFR92165"; exon_number "6"; gene_source "ena"; gene_biotype "protein_coding"; transcript_source "ena"; transcript_biotype "protein_coding"; protein_id "AFR92165"; protein_version "1";
1	ena	exon	86165	86453	.	+	.	gene_id "CNAG_00027"; transcript_id "AFR92165"; exon_number "7"; gene_source "ena"; gene_biotype "protein_coding"; transcript_source "ena"; transcript_biotype "protein_coding"; exon_id "AFR92165-7";
1	ena	CDS	86165	86453	.	+	2	gene_id "CNAG_00027"; transcript_id "AFR92165"; exon_number "7"; gene_source "ena"; gene_biotype "protein_coding"; transcript_source "ena"; transcript_biotype "protein_coding"; protein_id "AFR92165"; protein_version "1";
1	ena	exon	86517	87837	.	+	.	gene_id "CNAG_00027"; transcript_id "AFR92165"; exon_number "8"; gene_source "ena"; gene_biotype "protein_coding"; transcript_source "ena"; transcript_biotype "protein_coding"; exon_id "AFR92165-8";
1	ena	CDS	86517	86652	.	+	1	gene_id "CNAG_00027"; transcript_id "AFR92165"; exon_number "8"; gene_source "ena"; gene_biotype "protein_coding"; transcript_source "ena"; transcript_biotype "protein_coding"; protein_id "AFR92165"; protein_version "1";
1	ena	stop_codon	86653	86655	.	+	0	gene_id "CNAG_00027"; transcript_id "AFR92165"; exon_number "8"; gene_source "ena"; gene_biotype "protein_coding"; transcript_source "ena"; transcript_biotype "protein_coding";
1	ena	five_prime_utr	83936	84071	.	+	.	gene_id "CNAG_00027"; transcript_id "AFR92165"; gene_source "ena"; gene_biotype "protein_coding"; transcript_source "ena"; transcript_biotype "protein_coding";
1	ena	three_prime_utr	86656	87837	.	+	.	gene_id "CNAG_00027"; transcript_id "AFR92165"; gene_source "ena"; gene_biotype "protein_coding"; transcript_source "ena"; transcript_biotype "protein_coding";
1	ena	gene	87681	90146	.	-	.	gene_id "CNAG_00028"; gene_source "ena"; gene_biotype "protein_coding";
1	ena	transcript	87681	90146	.	-	.	gene_id "CNAG_00028"; transcript_id "AFR92166"; gene_source "ena"; gene_biotype "protein_coding"; transcript_source "ena"; transcript_biotype "protein_coding";
1	ena	exon	89715	90146	.	-	.	gene_id "CNAG_00028"; transcript_id "AFR92166"; exon_number "1"; gene_source "ena"; gene_biotype "protein_coding"; transcript_source "ena"; transcript_biotype "protein_coding"; exon_id "AFR92166-1";
1	ena	CDS	89715	89843	.	-	0	gene_id "CNAG_00028"; transcript_id "AFR92166"; exon_number "1"; gene_source "ena"; gene_biotype "protein_coding"; transcript_source "ena"; transcript_biotype "protein_coding"; protein_id "AFR92166"; protein_version "1";
1	ena	start_codon	89841	89843	.	-	0	gene_id "CNAG_00028"; transcript_id "AFR92166"; exon_number "1"; gene_source "ena"; gene_biotype "protein_coding"; transcript_source "ena"; transcript_biotype "protein_coding";
1	ena	exon	89475	89649	.	-	.	gene_id "CNAG_00028"; transcript_id "AFR92166"; exon_number "2"; gene_source "ena"; gene_biotype "protein_coding"; transcript_source "ena"; transcript_biotype "protein_coding"; exon_id "AFR92166-2";
1	ena	CDS	89475	89649	.	-	0	gene_id "CNAG_00028"; transcript_id "AFR92166"; exon_number "2"; gene_source "ena"; gene_biotype "protein_coding"; transcript_source "ena"; transcript_biotype "protein_coding"; protein_id "AFR92166"; protein_version "1";
1	ena	exon	89273	89422	.	-	.	gene_id "CNAG_00028"; transcript_id "AFR92166"; exon_number "3"; gene_source "ena"; gene_biotype "protein_coding"; transcript_source "ena"; transcript_biotype "protein_coding"; exon_id "AFR92166-3";
1	ena	CDS	89273	89422	.	-	2	gene_id "CNAG_00028"; transcript_id "AFR92166"; exon_number "3"; gene_source "ena"; gene_biotype "protein_coding"; transcript_source "ena"; transcript_biotype "protein_coding"; protein_id "AFR92166"; protein_version "1";
1	ena	exon	89110	89212	.	-	.	gene_id "CNAG_00028"; transcript_id "AFR92166"; exon_number "4"; gene_source "ena"; gene_biotype "protein_coding"; transcript_source "ena"; transcript_biotype "protein_coding"; exon_id "AFR92166-4";
1	ena	CDS	89110	89212	.	-	2	gene_id "CNAG_00028"; transcript_id "AFR92166"; exon_number "4"; gene_source "ena"; gene_biotype "protein_coding"; transcript_source "ena"; transcript_biotype "protein_coding"; protein_id "AFR92166"; protein_version "1";
1	ena	exon	88852	89036	.	-	.	gene_id "CNAG_00028"; transcript_id "AFR92166"; exon_number "5"; gene_source "ena"; gene_biotype "protein_coding"; transcript_source "ena"; transcript_biotype "protein_coding"; exon_id "AFR92166-5";
1	ena	CDS	88852	89036	.	-	1	gene_id "CNAG_00028"; transcript_id "AFR92166"; exon_number "5"; gene_source "ena"; gene_biotype "protein_coding"; transcript_source "ena"; transcript_biotype "protein_coding"; protein_id "AFR92166"; protein_version "1";
1	ena	exon	88701	88796	.	-	.	gene_id "CNAG_00028"; transcript_id "AFR92166"; exon_number "6"; gene_source "ena"; gene_biotype "protein_coding"; transcript_source "ena"; transcript_biotype "protein_coding"; exon_id "AFR92166-6";
1	ena	CDS	88701	88796	.	-	2	gene_id "CNAG_00028"; transcript_id "AFR92166"; exon_number "6"; gene_source "ena"; gene_biotype "protein_coding"; transcript_source "ena"; transcript_biotype "protein_coding"; protein_id "AFR92166"; protein_version "1";
1	ena	exon	88492	88628	.	-	.	gene_id "CNAG_00028"; transcript_id "AFR92166"; exon_number "7"; gene_source "ena"; gene_biotype "protein_coding"; transcript_source "ena"; transcript_biotype "protein_coding"; exon_id "AFR92166-7";
1	ena	CDS	88492	88628	.	-	2	gene_id "CNAG_00028"; transcript_id "AFR92166"; exon_number "7"; gene_source "ena"; gene_biotype "protein_coding"; transcript_source "ena"; transcript_biotype "protein_coding"; protein_id "AFR92166"; protein_version "1";
1	ena	exon	88263	88431	.	-	.	gene_id "CNAG_00028"; transcript_id "AFR92166"; exon_number "8"; gene_source "ena"; gene_biotype "protein_coding"; transcript_source "ena"; transcript_biotype "protein_coding"; exon_id "AFR92166-8";
1	ena	CDS	88263	88431	.	-	0	gene_id "CNAG_00028"; transcript_id "AFR92166"; exon_number "8"; gene_source "ena"; gene_biotype "protein_coding"; transcript_source "ena"; transcript_biotype "protein_coding"; protein_id "AFR92166"; protein_version "1";
1	ena	exon	88106	88208	.	-	.	gene_id "CNAG_00028"; transcript_id "AFR92166"; exon_number "9"; gene_source "ena"; gene_biotype "protein_coding"; transcript_source "ena"; transcript_biotype "protein_coding"; exon_id "AFR92166-9";
1	ena	CDS	88106	88208	.	-	2	gene_id "CNAG_00028"; transcript_id "AFR92166"; exon_number "9"; gene_source "ena"; gene_biotype "protein_coding"; transcript_source "ena"; transcript_biotype "protein_coding"; protein_id "AFR92166"; protein_version "1";
1	ena	exon	87681	88049	.	-	.	gene_id "CNAG_00028"; transcript_id "AFR92166"; exon_number "10"; gene_source "ena"; gene_biotype "protein_coding"; transcript_source "ena"; transcript_biotype "protein_coding"; exon_id "AFR92166-10";
1	ena	CDS	87815	88049	.	-	1	gene_id "CNAG_00028"; transcript_id "AFR92166"; exon_number "10"; gene_source "ena"; gene_biotype "protein_coding"; transcript_source "ena"; transcript_biotype "protein_coding"; protein_id "AFR92166"; protein_version "1";
1	ena	five_prime_utr	89844	90146	.	-	.	gene_id "CNAG_00028"; transcript_id "AFR92166"; gene_source "ena"; gene_biotype "protein_coding"; transcript_source "ena"; transcript_biotype "protein_coding";
1	ena	three_prime_utr	87681	87814	.	-	.	gene_id "CNAG_00028"; transcript_id "AFR92166"; gene_source "ena"; gene_biotype "protein_coding"; transcript_source "ena"; transcript_biotype "protein_coding";
1	ena	transcript	87815	89843	.	-	.	gene_id "CNAG_00028"; transcript_id "AGV15261"; gene_source "ena"; gene_biotype "protein_coding"; transcript_source "ena"; transcript_biotype "protein_coding";
1	ena	exon	89715	89843	.	-	.	gene_id "CNAG_00028"; transcript_id "AGV15261"; exon_number "1"; gene_source "ena"; gene_biotype "protein_coding"; transcript_source "ena"; transcript_biotype "protein_coding"; exon_id "AGV15261-1";
1	ena	CDS	89715	89843	.	-	0	gene_id "CNAG_00028"; transcript_id "AGV15261"; exon_number "1"; gene_source "ena"; gene_biotype "protein_coding"; transcript_source "ena"; transcript_biotype "protein_coding"; protein_id "AGV15261"; protein_version "1";
1	ena	start_codon	89841	89843	.	-	0	gene_id "CNAG_00028"; transcript_id "AGV15261"; exon_number "1"; gene_source "ena"; gene_biotype "protein_coding"; transcript_source "ena"; transcript_biotype "protein_coding";
1	ena	exon	89475	89649	.	-	.	gene_id "CNAG_00028"; transcript_id "AGV15261"; exon_number "2"; gene_source "ena"; gene_biotype "protein_coding"; transcript_source "ena"; transcript_biotype "protein_coding"; exon_id "AFR92166-2";
1	ena	CDS	89475	89649	.	-	0	gene_id "CNAG_00028"; transcript_id "AGV15261"; exon_number "2"; gene_source "ena"; gene_biotype "protein_coding"; transcript_source "ena"; transcript_biotype "protein_coding"; protein_id "AGV15261"; protein_version "1";
1	ena	exon	89273	89422	.	-	.	gene_id "CNAG_00028"; transcript_id "AGV15261"; exon_number "3"; gene_source "ena"; gene_biotype "protein_coding"; transcript_source "ena"; transcript_biotype "protein_coding"; exon_id "AFR92166-3";
1	ena	CDS	89273	89422	.	-	2	gene_id "CNAG_00028"; transcript_id "AGV15261"; exon_number "3"; gene_source "ena"; gene_biotype "protein_coding"; transcript_source "ena"; transcript_biotype "protein_coding"; protein_id "AGV15261"; protein_version "1";
1	ena	exon	89110	89212	.	-	.	gene_id "CNAG_00028"; transcript_id "AGV15261"; exon_number "4"; gene_source "ena"; gene_biotype "protein_coding"; transcript_source "ena"; transcript_biotype "protein_coding"; exon_id "AFR92166-4";
1	ena	CDS	89110	89212	.	-	2	gene_id "CNAG_00028"; transcript_id "AGV15261"; exon_number "4"; gene_source "ena"; gene_biotype "protein_coding"; transcript_source "ena"; transcript_biotype "protein_coding"; protein_id "AGV15261"; protein_version "1";
1	ena	exon	88852	89036	.	-	.	gene_id "CNAG_00028"; transcript_id "AGV15261"; exon_number "5"; gene_source "ena"; gene_biotype "protein_coding"; transcript_source "ena"; transcript_biotype "protein_coding"; exon_id "AFR92166-5";
1	ena	CDS	88852	89036	.	-	1	gene_id "CNAG_00028"; transcript_id "AGV15261"; exon_number "5"; gene_source "ena"; gene_biotype "protein_coding"; transcript_source "ena"; transcript_biotype "protein_coding"; protein_id "AGV15261"; protein_version "1";
1	ena	exon	88701	88796	.	-	.	gene_id "CNAG_00028"; transcript_id "AGV15261"; exon_number "6"; gene_source "ena"; gene_biotype "protein_coding"; transcript_source "ena"; transcript_biotype "protein_coding"; exon_id "AFR92166-6";
1	ena	CDS	88701	88796	.	-	2	gene_id "CNAG_00028"; transcript_id "AGV15261"; exon_number "6"; gene_source "ena"; gene_biotype "protein_coding"; transcript_source "ena"; transcript_biotype "protein_coding"; protein_id "AGV15261"; protein_version "1";
1	ena	exon	88492	88628	.	-	.	gene_id "CNAG_00028"; transcript_id "AGV15261"; exon_number "7"; gene_source "ena"; gene_biotype "protein_coding"; transcript_source "ena"; transcript_biotype "protein_coding"; exon_id "AFR92166-7";
1	ena	CDS	88492	88628	.	-	2	gene_id "CNAG_00028"; transcript_id "AGV15261"; exon_number "7"; gene_source "ena"; gene_biotype "protein_coding"; transcript_source "ena"; transcript_biotype "protein_coding"; protein_id "AGV15261"; protein_version "1";
1	ena	exon	88263	88431	.	-	.	gene_id "CNAG_00028"; transcript_id "AGV15261"; exon_number "8"; gene_source "ena"; gene_biotype "protein_coding"; transcript_source "ena"; transcript_biotype "protein_coding"; exon_id "AFR92166-8";
1	ena	CDS	88263	88431	.	-	0	gene_id "CNAG_00028"; transcript_id "AGV15261"; exon_number "8"; gene_source "ena"; gene_biotype "protein_coding"; transcript_source "ena"; transcript_biotype "protein_coding"; protein_id "AGV15261"; protein_version "1";
1	ena	exon	88106	88208	.	-	.	gene_id "CNAG_00028"; transcript_id "AGV15261"; exon_number "9"; gene_source "ena"; gene_biotype "protein_coding"; transcript_source "ena"; transcript_biotype "protein_coding"; exon_id "AFR92166-9";
1	ena	CDS	88106	88208	.	-	2	gene_id "CNAG_00028"; transcript_id "AGV15261"; exon_number "9"; gene_source "ena"; gene_biotype "protein_coding"; transcript_source "ena"; transcript_biotype "protein_coding"; protein_id "AGV15261"; protein_version "1";
1	ena	exon	87815	88049	.	-	.	gene_id "CNAG_00028"; transcript_id "AGV15261"; exon_number "10"; gene_source "ena"; gene_biotype "protein_coding"; transcript_source "ena"; transcript_biotype "protein_coding"; exon_id "AGV15261-10";
1	ena	CDS	87818	88049	.	-	1	gene_id "CNAG_00028"; transcript_id "AGV15261"; exon_number "10"; gene_source "ena"; gene_biotype "protein_coding"; transcript_source "ena"; transcript_biotype "protein_coding"; protein_id "AGV15261"; protein_version "1";
1	ena	stop_codon	87815	87817	.	-	0	gene_id "CNAG_00028"; transcript_id "AGV15261"; exon_number "10"; gene_source "ena"; gene_biotype "protein_coding"; transcript_source "ena"; transcript_biotype "protein_coding";
1	ena	gene	90366	91873	.	+	.	gene_id "CNAG_00029"; gene_source "ena"; gene_biotype "protein_coding";
1	ena	transcript	90366	91873	.	+	.	gene_id "CNAG_00029"; transcript_id "AFR92167"; gene_source "ena"; gene_biotype "protein_coding"; transcript_source "ena"; transcript_biotype "protein_coding";
1	ena	exon	90366	90882	.	+	.	gene_id "CNAG_00029"; transcript_id "AFR92167"; exon_number "1"; gene_source "ena"; gene_biotype "protein_coding"; transcript_source "ena"; transcript_biotype "protein_coding"; exon_id "AFR92167-1";
1	ena	CDS	90490	90882	.	+	0	gene_id "CNAG_00029"; transcript_id "AFR92167"; exon_number "1"; gene_source "ena"; gene_biotype "protein_coding"; transcript_source "ena"; transcript_biotype "protein_coding"; protein_id "AFR92167"; protein_version "1";
1	ena	start_codon	90490	90492	.	+	0	gene_id "CNAG_00029"; transcript_id "AFR92167"; exon_number "1"; gene_source "ena"; gene_biotype "protein_coding"; transcript_source "ena"; transcript_biotype "protein_coding";
1	ena	exon	90940	90980	.	+	.	gene_id "CNAG_00029"; transcript_id "AFR92167"; exon_number "2"; gene_source "ena"; gene_biotype "protein_coding"; transcript_source "ena"; transcript_biotype "protein_coding"; exon_id "AFR92167-2";
1	ena	CDS	90940	90980	.	+	0	gene_id "CNAG_00029"; transcript_id "AFR92167"; exon_number "2"; gene_source "ena"; gene_biotype "protein_coding"; transcript_source "ena"; transcript_biotype "protein_coding"; protein_id "AFR92167"; protein_version "1";
1	ena	exon	91036	91148	.	+	.	gene_id "CNAG_00029"; transcript_id "AFR92167"; exon_number "3"; gene_source "ena"; gene_biotype "protein_coding"; transcript_source "ena"; transcript_biotype "protein_coding"; exon_id "AFR92167-3";
1	ena	CDS	91036	91148	.	+	1	gene_id "CNAG_00029"; transcript_id "AFR92167"; exon_number "3"; gene_source "ena"; gene_biotype "protein_coding"; transcript_source "ena"; transcript_biotype "protein_coding"; protein_id "AFR92167"; protein_version "1";
1	ena	exon	91211	91628	.	+	.	gene_id "CNAG_00029"; transcript_id "AFR92167"; exon_number "4"; gene_source "ena"; gene_biotype "protein_coding"; transcript_source "ena"; transcript_biotype "protein_coding"; exon_id "AFR92167-4";
1	ena	CDS	91211	91628	.	+	2	gene_id "CNAG_00029"; transcript_id "AFR92167"; exon_number "4"; gene_source "ena"; gene_biotype "protein_coding"; transcript_source "ena"; transcript_biotype "protein_coding"; protein_id "AFR92167"; protein_version "1";
1	ena	exon	91678	91873	.	+	.	gene_id "CNAG_00029"; transcript_id "AFR92167"; exon_number "5"; gene_source "ena"; gene_biotype "protein_coding"; transcript_source "ena"; transcript_biotype "protein_coding"; exon_id "AFR92167-5";
1	ena	CDS	91678	91783	.	+	1	gene_id "CNAG_00029"; transcript_id "AFR92167"; exon_number "5"; gene_source "ena"; gene_biotype "protein_coding"; transcript_source "ena"; transcript_biotype "protein_coding"; protein_id "AFR92167"; protein_version "1";
1	ena	stop_codon	91784	91786	.	+	0	gene_id "CNAG_00029"; transcript_id "AFR92167"; exon_number "5"; gene_source "ena"; gene_biotype "protein_coding"; transcript_source "ena"; transcript_biotype "protein_coding";
1	ena	five_prime_utr	90366	90489	.	+	.	gene_id "CNAG_00029"; transcript_id "AFR92167"; gene_source "ena"; gene_biotype "protein_coding"; transcript_source "ena"; transcript_biotype "protein_coding";
1	ena	three_prime_utr	91787	91873	.	+	.	gene_id "CNAG_00029"; transcript_id "AFR92167"; gene_source "ena"; gene_biotype "protein_coding"; transcript_source "ena"; transcript_biotype "protein_coding";
1	ena	gene	92043	93466	.	+	.	gene_id "CNAG_00030"; gene_source "ena"; gene_biotype "protein_coding";
1	ena	transcript	92043	93466	.	+	.	gene_id "CNAG_00030"; transcript_id "AGV15262"; gene_source "ena"; gene_biotype "protein_coding"; transcript_source "ena"; transcript_biotype "protein_coding";
1	ena	exon	92043	92236	.	+	.	gene_id "CNAG_00030"; transcript_id "AGV15262"; exon_number "1"; gene_source "ena"; gene_biotype "protein_coding"; transcript_source "ena"; transcript_biotype "protein_coding"; exon_id "AFR92168-1";
1	ena	CDS	92137	92236	.	+	0	gene_id "CNAG_00030"; transcript_id "AGV15262"; exon_number "1"; gene_source "ena"; gene_biotype "protein_coding"; transcript_source "ena"; transcript_biotype "protein_coding"; protein_id "AGV15262"; protein_version "1";
1	ena	start_codon	92137	92139	.	+	0	gene_id "CNAG_00030"; transcript_id "AGV15262"; exon_number "1"; gene_source "ena"; gene_biotype "protein_coding"; transcript_source "ena"; transcript_biotype "protein_coding";
1	ena	exon	92295	92506	.	+	.	gene_id "CNAG_00030"; transcript_id "AGV15262"; exon_number "2"; gene_source "ena"; gene_biotype "protein_coding"; transcript_source "ena"; transcript_biotype "protein_coding"; exon_id "AFR92168-2";
1	ena	CDS	92295	92506	.	+	2	gene_id "CNAG_00030"; transcript_id "AGV15262"; exon_number "2"; gene_source "ena"; gene_biotype "protein_coding"; transcript_source "ena"; transcript_biotype "protein_coding"; protein_id "AGV15262"; protein_version "1";
1	ena	exon	92574	92682	.	+	.	gene_id "CNAG_00030"; transcript_id "AGV15262"; exon_number "3"; gene_source "ena"; gene_biotype "protein_coding"; transcript_source "ena"; transcript_biotype "protein_coding"; exon_id "AFR92168-3";
1	ena	CDS	92574	92682	.	+	0	gene_id "CNAG_00030"; transcript_id "AGV15262"; exon_number "3"; gene_source "ena"; gene_biotype "protein_coding"; transcript_source "ena"; transcript_biotype "protein_coding"; protein_id "AGV15262"; protein_version "1";
1	ena	exon	92742	92878	.	+	.	gene_id "CNAG_00030"; transcript_id "AGV15262"; exon_number "4"; gene_source "ena"; gene_biotype "protein_coding"; transcript_source "ena"; transcript_biotype "protein_coding"; exon_id "AFR92168-4";
1	ena	CDS	92742	92878	.	+	2	gene_id "CNAG_00030"; transcript_id "AGV15262"; exon_number "4"; gene_source "ena"; gene_biotype "protein_coding"; transcript_source "ena"; transcript_biotype "protein_coding"; protein_id "AGV15262"; protein_version "1";
1	ena	exon	92942	93029	.	+	.	gene_id "CNAG_00030"; transcript_id "AGV15262"; exon_number "5"; gene_source "ena"; gene_biotype "protein_coding"; transcript_source "ena"; transcript_biotype "protein_coding"; exon_id "AFR92168-5";
1	ena	CDS	92942	93029	.	+	0	gene_id "CNAG_00030"; transcript_id "AGV15262"; exon_number "5"; gene_source "ena"; gene_biotype "protein_coding"; transcript_source "ena"; transcript_biotype "protein_coding"; protein_id "AGV15262"; protein_version "1";
1	ena	exon	93115	93466	.	+	.	gene_id "CNAG_00030"; transcript_id "AGV15262"; exon_number "6"; gene_source "ena"; gene_biotype "protein_coding"; transcript_source "ena"; transcript_biotype "protein_coding"; exon_id "AGV15262-6";
1	ena	CDS	93115	93365	.	+	2	gene_id "CNAG_00030"; transcript_id "AGV15262"; exon_number "6"; gene_source "ena"; gene_biotype "protein_coding"; transcript_source "ena"; transcript_biotype "protein_coding"; protein_id "AGV15262"; protein_version "1";
1	ena	five_prime_utr	92043	92136	.	+	.	gene_id "CNAG_00030"; transcript_id "AGV15262"; gene_source "ena"; gene_biotype "protein_coding"; transcript_source "ena"; transcript_biotype "protein_coding";
1	ena	three_prime_utr	93366	93466	.	+	.	gene_id "CNAG_00030"; transcript_id "AGV15262"; gene_source "ena"; gene_biotype "protein_coding"; transcript_source "ena"; transcript_biotype "protein_coding";
1	ena	transcript	92043	93466	.	+	.	gene_id "CNAG_00030"; transcript_id "AFR92168"; gene_source "ena"; gene_biotype "protein_coding"; transcript_source "ena"; transcript_biotype "protein_coding";
1	ena	exon	92043	92236	.	+	.	gene_id "CNAG_00030"; transcript_id "AFR92168"; exon_number "1"; gene_source "ena"; gene_biotype "protein_coding"; transcript_source "ena"; transcript_biotype "protein_coding"; exon_id "AFR92168-1";
1	ena	CDS	92137	92236	.	+	0	gene_id "CNAG_00030"; transcript_id "AFR92168"; exon_number "1"; gene_source "ena"; gene_biotype "protein_coding"; transcript_source "ena"; transcript_biotype "protein_coding"; protein_id "AFR92168"; protein_version "1";
1	ena	start_codon	92137	92139	.	+	0	gene_id "CNAG_00030"; transcript_id "AFR92168"; exon_number "1"; gene_source "ena"; gene_biotype "protein_coding"; transcript_source "ena"; transcript_biotype "protein_coding";
1	ena	exon	92295	92506	.	+	.	gene_id "CNAG_00030"; transcript_id "AFR92168"; exon_number "2"; gene_source "ena"; gene_biotype "protein_coding"; transcript_source "ena"; transcript_biotype "protein_coding"; exon_id "AFR92168-2";
1	ena	CDS	92295	92506	.	+	2	gene_id "CNAG_00030"; transcript_id "AFR92168"; exon_number "2"; gene_source "ena"; gene_biotype "protein_coding"; transcript_source "ena"; transcript_biotype "protein_coding"; protein_id "AFR92168"; protein_version "1";
1	ena	exon	92574	92682	.	+	.	gene_id "CNAG_00030"; transcript_id "AFR92168"; exon_number "3"; gene_source "ena"; gene_biotype "protein_coding"; transcript_source "ena"; transcript_biotype "protein_coding"; exon_id "AFR92168-3";
1	ena	CDS	92574	92682	.	+	0	gene_id "CNAG_00030"; transcript_id "AFR92168"; exon_number "3"; gene_source "ena"; gene_biotype "protein_coding"; transcript_source "ena"; transcript_biotype "protein_coding"; protein_id "AFR92168"; protein_version "1";
1	ena	exon	92742	92878	.	+	.	gene_id "CNAG_00030"; transcript_id "AFR92168"; exon_number "4"; gene_source "ena"; gene_biotype "protein_coding"; transcript_source "ena"; transcript_biotype "protein_coding"; exon_id "AFR92168-4";
1	ena	CDS	92742	92878	.	+	2	gene_id "CNAG_00030"; transcript_id "AFR92168"; exon_number "4"; gene_source "ena"; gene_biotype "protein_coding"; transcript_source "ena"; transcript_biotype "protein_coding"; protein_id "AFR92168"; protein_version "1";
1	ena	exon	92942	93029	.	+	.	gene_id "CNAG_00030"; transcript_id "AFR92168"; exon_number "5"; gene_source "ena"; gene_biotype "protein_coding"; transcript_source "ena"; transcript_biotype "protein_coding"; exon_id "AFR92168-5";
1	ena	CDS	92942	93029	.	+	0	gene_id "CNAG_00030"; transcript_id "AFR92168"; exon_number "5"; gene_source "ena"; gene_biotype "protein_coding"; transcript_source "ena"; transcript_biotype "protein_coding"; protein_id "AFR92168"; protein_version "1";
1	ena	exon	93076	93466	.	+	.	gene_id "CNAG_00030"; transcript_id "AFR92168"; exon_number "6"; gene_source "ena"; gene_biotype "protein_coding"; transcript_source "ena"; transcript_biotype "protein_coding"; exon_id "AFR92168-6";
1	ena	CDS	93076	93365	.	+	2	gene_id "CNAG_00030"; transcript_id "AFR92168"; exon_number "6"; gene_source "ena"; gene_biotype "protein_coding"; transcript_source "ena"; transcript_biotype "protein_coding"; protein_id "AFR92168"; protein_version "1";
1	ena	five_prime_utr	92043	92136	.	+	.	gene_id "CNAG_00030"; transcript_id "AFR92168"; gene_source "ena"; gene_biotype "protein_coding"; transcript_source "ena"; transcript_biotype "protein_coding";
1	ena	three_prime_utr	93366	93466	.	+	.	gene_id "CNAG_00030"; transcript_id "AFR92168"; gene_source "ena"; gene_biotype "protein_coding"; transcript_source "ena"; transcript_biotype "protein_coding";
1	ena	gene	92930	96641	.	-	.	gene_id "CNAG_00031"; gene_source "ena"; gene_biotype "protein_coding";
1	ena	transcript	92930	96641	.	-	.	gene_id "CNAG_00031"; transcript_id "AGV15263"; gene_source "ena"; gene_biotype "protein_coding"; transcript_source "ena"; transcript_biotype "protein_coding";
1	ena	exon	96411	96641	.	-	.	gene_id "CNAG_00031"; transcript_id "AGV15263"; exon_number "1"; gene_source "ena"; gene_biotype "protein_coding"; transcript_source "ena"; transcript_biotype "protein_coding"; exon_id "AGV15263-1";
1	ena	CDS	96411	96545	.	-	0	gene_id "CNAG_00031"; transcript_id "AGV15263"; exon_number "1"; gene_source "ena"; gene_biotype "protein_coding"; transcript_source "ena"; transcript_biotype "protein_coding"; protein_id "AGV15263"; protein_version "1";
1	ena	start_codon	96543	96545	.	-	0	gene_id "CNAG_00031"; transcript_id "AGV15263"; exon_number "1"; gene_source "ena"; gene_biotype "protein_coding"; transcript_source "ena"; transcript_biotype "protein_coding";
1	ena	exon	96235	96332	.	-	.	gene_id "CNAG_00031"; transcript_id "AGV15263"; exon_number "2"; gene_source "ena"; gene_biotype "protein_coding"; transcript_source "ena"; transcript_biotype "protein_coding"; exon_id "AFR92169-2";
1	ena	CDS	96235	96332	.	-	0	gene_id "CNAG_00031"; transcript_id "AGV15263"; exon_number "2"; gene_source "ena"; gene_biotype "protein_coding"; transcript_source "ena"; transcript_biotype "protein_coding"; protein_id "AGV15263"; protein_version "1";
1	ena	exon	95367	96181	.	-	.	gene_id "CNAG_00031"; transcript_id "AGV15263"; exon_number "3"; gene_source "ena"; gene_biotype "protein_coding"; transcript_source "ena"; transcript_biotype "protein_coding"; exon_id "AFR92169-3";
1	ena	CDS	95367	96181	.	-	1	gene_id "CNAG_00031"; transcript_id "AGV15263"; exon_number "3"; gene_source "ena"; gene_biotype "protein_coding"; transcript_source "ena"; transcript_biotype "protein_coding"; protein_id "AGV15263"; protein_version "1";
1	ena	exon	95221	95292	.	-	.	gene_id "CNAG_00031"; transcript_id "AGV15263"; exon_number "4"; gene_source "ena"; gene_biotype "protein_coding"; transcript_source "ena"; transcript_biotype "protein_coding"; exon_id "AFR92169-4";
1	ena	CDS	95221	95292	.	-	2	gene_id "CNAG_00031"; transcript_id "AGV15263"; exon_number "4"; gene_source "ena"; gene_biotype "protein_coding"; transcript_source "ena"; transcript_biotype "protein_coding"; protein_id "AGV15263"; protein_version "1";
1	ena	exon	95149	95171	.	-	.	gene_id "CNAG_00031"; transcript_id "AGV15263"; exon_number "5"; gene_source "ena"; gene_biotype "protein_coding"; transcript_source "ena"; transcript_biotype "protein_coding"; exon_id "AFR92169-5";
1	ena	CDS	95149	95171	.	-	2	gene_id "CNAG_00031"; transcript_id "AGV15263"; exon_number "5"; gene_source "ena"; gene_biotype "protein_coding"; transcript_source "ena"; transcript_biotype "protein_coding"; protein_id "AGV15263"; protein_version "1";
1	ena	exon	94987	95095	.	-	.	gene_id "CNAG_00031"; transcript_id "AGV15263"; exon_number "6"; gene_source "ena"; gene_biotype "protein_coding"; transcript_source "ena"; transcript_biotype "protein_coding"; exon_id "AFR92169-6";
1	ena	CDS	94987	95095	.	-	0	gene_id "CNAG_00031"; transcript_id "AGV15263"; exon_number "6"; gene_source "ena"; gene_biotype "protein_coding"; transcript_source "ena"; transcript_biotype "protein_coding"; protein_id "AGV15263"; protein_version "1";
1	ena	exon	94814	94916	.	-	.	gene_id "CNAG_00031"; transcript_id "AGV15263"; exon_number "7"; gene_source "ena"; gene_biotype "protein_coding"; transcript_source "ena"; transcript_biotype "protein_coding"; exon_id "AGV15263-7";
1	ena	CDS	94814	94916	.	-	2	gene_id "CNAG_00031"; transcript_id "AGV15263"; exon_number "7"; gene_source "ena"; gene_biotype "protein_coding"; transcript_source "ena"; transcript_biotype "protein_coding"; protein_id "AGV15263"; protein_version "1";
1	ena	exon	94675	94753	.	-	.	gene_id "CNAG_00031"; transcript_id "AGV15263"; exon_number "8"; gene_source "ena"; gene_biotype "protein_coding"; transcript_source "ena"; transcript_biotype "protein_coding"; exon_id "AFR92169-8";
1	ena	CDS	94675	94753	.	-	1	gene_id "CNAG_00031"; transcript_id "AGV15263"; exon_number "8"; gene_source "ena"; gene_biotype "protein_coding"; transcript_source "ena"; transcript_biotype "protein_coding"; protein_id "AGV15263"; protein_version "1";
1	ena	exon	94207	94615	.	-	.	gene_id "CNAG_00031"; transcript_id "AGV15263"; exon_number "9"; gene_source "ena"; gene_biotype "protein_coding"; transcript_source "ena"; transcript_biotype "protein_coding"; exon_id "AFR92169-9";
1	ena	CDS	94207	94615	.	-	0	gene_id "CNAG_00031"; transcript_id "AGV15263"; exon_number "9"; gene_source "ena"; gene_biotype "protein_coding"; transcript_source "ena"; transcript_biotype "protein_coding"; protein_id "AGV15263"; protein_version "1";
1	ena	exon	93992	94144	.	-	.	gene_id "CNAG_00031"; transcript_id "AGV15263"; exon_number "10"; gene_source "ena"; gene_biotype "protein_coding"; transcript_source "ena"; transcript_biotype "protein_coding"; exon_id "AFR92169-10";
1	ena	CDS	93992	94144	.	-	2	gene_id "CNAG_00031"; transcript_id "AGV15263"; exon_number "10"; gene_source "ena"; gene_biotype "protein_coding"; transcript_source "ena"; transcript_biotype "protein_coding"; protein_id "AGV15263"; protein_version "1";
1	ena	exon	92930	93927	.	-	.	gene_id "CNAG_00031"; transcript_id "AGV15263"; exon_number "11"; gene_source "ena"; gene_biotype "protein_coding"; transcript_source "ena"; transcript_biotype "protein_coding"; exon_id "AGV15263-11";
1	ena	CDS	93509	93927	.	-	2	gene_id "CNAG_00031"; transcript_id "AGV15263"; exon_number "11"; gene_source "ena"; gene_biotype "protein_coding"; transcript_source "ena"; transcript_biotype "protein_coding"; protein_id "AGV15263"; protein_version "1";
1	ena	stop_codon	93506	93508	.	-	0	gene_id "CNAG_00031"; transcript_id "AGV15263"; exon_number "11"; gene_source "ena"; gene_biotype "protein_coding"; transcript_source "ena"; transcript_biotype "protein_coding";
1	ena	five_prime_utr	96546	96641	.	-	.	gene_id "CNAG_00031"; transcript_id "AGV15263"; gene_source "ena"; gene_biotype "protein_coding"; transcript_source "ena"; transcript_biotype "protein_coding";
1	ena	three_prime_utr	92930	93505	.	-	.	gene_id "CNAG_00031"; transcript_id "AGV15263"; gene_source "ena"; gene_biotype "protein_coding"; transcript_source "ena"; transcript_biotype "protein_coding";
1	ena	transcript	93506	96545	.	-	.	gene_id "CNAG_00031"; transcript_id "AFR92169"; gene_source "ena"; gene_biotype "protein_coding"; transcript_source "ena"; transcript_biotype "protein_coding";
1	ena	exon	96411	96545	.	-	.	gene_id "CNAG_00031"; transcript_id "AFR92169"; exon_number "1"; gene_source "ena"; gene_biotype "protein_coding"; transcript_source "ena"; transcript_biotype "protein_coding"; exon_id "AFR92169-1";
1	ena	CDS	96411	96545	.	-	0	gene_id "CNAG_00031"; transcript_id "AFR92169"; exon_number "1"; gene_source "ena"; gene_biotype "protein_coding"; transcript_source "ena"; transcript_biotype "protein_coding"; protein_id "AFR92169"; protein_version "1";
1	ena	start_codon	96543	96545	.	-	0	gene_id "CNAG_00031"; transcript_id "AFR92169"; exon_number "1"; gene_source "ena"; gene_biotype "protein_coding"; transcript_source "ena"; transcript_biotype "protein_coding";
1	ena	exon	96235	96332	.	-	.	gene_id "CNAG_00031"; transcript_id "AFR92169"; exon_number "2"; gene_source "ena"; gene_biotype "protein_coding"; transcript_source "ena"; transcript_biotype "protein_coding"; exon_id "AFR92169-2";
1	ena	CDS	96235	96332	.	-	0	gene_id "CNAG_00031"; transcript_id "AFR92169"; exon_number "2"; gene_source "ena"; gene_biotype "protein_coding"; transcript_source "ena"; transcript_biotype "protein_coding"; protein_id "AFR92169"; protein_version "1";
1	ena	exon	95367	96181	.	-	.	gene_id "CNAG_00031"; transcript_id "AFR92169"; exon_number "3"; gene_source "ena"; gene_biotype "protein_coding"; transcript_source "ena"; transcript_biotype "protein_coding"; exon_id "AFR92169-3";
1	ena	CDS	95367	96181	.	-	1	gene_id "CNAG_00031"; transcript_id "AFR92169"; exon_number "3"; gene_source "ena"; gene_biotype "protein_coding"; transcript_source "ena"; transcript_biotype "protein_coding"; protein_id "AFR92169"; protein_version "1";
1	ena	exon	95221	95292	.	-	.	gene_id "CNAG_00031"; transcript_id "AFR92169"; exon_number "4"; gene_source "ena"; gene_biotype "protein_coding"; transcript_source "ena"; transcript_biotype "protein_coding"; exon_id "AFR92169-4";
1	ena	CDS	95221	95292	.	-	2	gene_id "CNAG_00031"; transcript_id "AFR92169"; exon_number "4"; gene_source "ena"; gene_biotype "protein_coding"; transcript_source "ena"; transcript_biotype "protein_coding"; protein_id "AFR92169"; protein_version "1";
1	ena	exon	95149	95171	.	-	.	gene_id "CNAG_00031"; transcript_id "AFR92169"; exon_number "5"; gene_source "ena"; gene_biotype "protein_coding"; transcript_source "ena"; transcript_biotype "protein_coding"; exon_id "AFR92169-5";
1	ena	CDS	95149	95171	.	-	2	gene_id "CNAG_00031"; transcript_id "AFR92169"; exon_number "5"; gene_source "ena"; gene_biotype "protein_coding"; transcript_source "ena"; transcript_biotype "protein_coding"; protein_id "AFR92169"; protein_version "1";
1	ena	exon	94987	95095	.	-	.	gene_id "CNAG_00031"; transcript_id "AFR92169"; exon_number "6"; gene_source "ena"; gene_biotype "protein_coding"; transcript_source "ena"; transcript_biotype "protein_coding"; exon_id "AFR92169-6";
1	ena	CDS	94987	95095	.	-	0	gene_id "CNAG_00031"; transcript_id "AFR92169"; exon_number "6"; gene_source "ena"; gene_biotype "protein_coding"; transcript_source "ena"; transcript_biotype "protein_coding"; protein_id "AFR92169"; protein_version "1";
1	ena	exon	94814	94940	.	-	.	gene_id "CNAG_00031"; transcript_id "AFR92169"; exon_number "7"; gene_source "ena"; gene_biotype "protein_coding"; transcript_source "ena"; transcript_biotype "protein_coding"; exon_id "AFR92169-7";
1	ena	CDS	94814	94940	.	-	2	gene_id "CNAG_00031"; transcript_id "AFR92169"; exon_number "7"; gene_source "ena"; gene_biotype "protein_coding"; transcript_source "ena"; transcript_biotype "protein_coding"; protein_id "AFR92169"; protein_version "1";
1	ena	exon	94675	94753	.	-	.	gene_id "CNAG_00031"; transcript_id "AFR92169"; exon_number "8"; gene_source "ena"; gene_biotype "protein_coding"; transcript_source "ena"; transcript_biotype "protein_coding"; exon_id "AFR92169-8";
1	ena	CDS	94675	94753	.	-	1	gene_id "CNAG_00031"; transcript_id "AFR92169"; exon_number "8"; gene_source "ena"; gene_biotype "protein_coding"; transcript_source "ena"; transcript_biotype "protein_coding"; protein_id "AFR92169"; protein_version "1";
1	ena	exon	94207	94615	.	-	.	gene_id "CNAG_00031"; transcript_id "AFR92169"; exon_number "9"; gene_source "ena"; gene_biotype "protein_coding"; transcript_source "ena"; transcript_biotype "protein_coding"; exon_id "AFR92169-9";
1	ena	CDS	94207	94615	.	-	0	gene_id "CNAG_00031"; transcript_id "AFR92169"; exon_number "9"; gene_source "ena"; gene_biotype "protein_coding"; transcript_source "ena"; transcript_biotype "protein_coding"; protein_id "AFR92169"; protein_version "1";
1	ena	exon	93992	94144	.	-	.	gene_id "CNAG_00031"; transcript_id "AFR92169"; exon_number "10"; gene_source "ena"; gene_biotype "protein_coding"; transcript_source "ena"; transcript_biotype "protein_coding"; exon_id "AFR92169-10";
1	ena	CDS	93992	94144	.	-	2	gene_id "CNAG_00031"; transcript_id "AFR92169"; exon_number "10"; gene_source "ena"; gene_biotype "protein_coding"; transcript_source "ena"; transcript_biotype "protein_coding"; protein_id "AFR92169"; protein_version "1";
1	ena	exon	93506	93927	.	-	.	gene_id "CNAG_00031"; transcript_id "AFR92169"; exon_number "11"; gene_source "ena"; gene_biotype "protein_coding"; transcript_source "ena"; transcript_biotype "protein_coding"; exon_id "AFR92169-11";
1	ena	CDS	93509	93927	.	-	2	gene_id "CNAG_00031"; transcript_id "AFR92169"; exon_number "11"; gene_source "ena"; gene_biotype "protein_coding"; transcript_source "ena"; transcript_biotype "protein_coding"; protein_id "AFR92169"; protein_version "1";
1	ena	stop_codon	93506	93508	.	-	0	gene_id "CNAG_00031"; transcript_id "AFR92169"; exon_number "11"; gene_source "ena"; gene_biotype "protein_coding"; transcript_source "ena"; transcript_biotype "protein_coding";
1	ena	gene	96762	99351	.	+	.	gene_id "CNAG_00032"; gene_source "ena"; gene_biotype "protein_coding";
1	ena	transcript	96762	99351	.	+	.	gene_id "CNAG_00032"; transcript_id "AFR92170"; gene_source "ena"; gene_biotype "protein_coding"; transcript_source "ena"; transcript_biotype "protein_coding";
1	ena	exon	96762	97115	.	+	.	gene_id "CNAG_00032"; transcript_id "AFR92170"; exon_number "1"; gene_source "ena"; gene_biotype "protein_coding"; transcript_source "ena"; transcript_biotype "protein_coding"; exon_id "AFR92170-1";
1	ena	CDS	96969	97115	.	+	0	gene_id "CNAG_00032"; transcript_id "AFR92170"; exon_number "1"; gene_source "ena"; gene_biotype "protein_coding"; transcript_source "ena"; transcript_biotype "protein_coding"; protein_id "AFR92170"; protein_version "1";
1	ena	start_codon	96969	96971	.	+	0	gene_id "CNAG_00032"; transcript_id "AFR92170"; exon_number "1"; gene_source "ena"; gene_biotype "protein_coding"; transcript_source "ena"; transcript_biotype "protein_coding";
1	ena	exon	97164	97315	.	+	.	gene_id "CNAG_00032"; transcript_id "AFR92170"; exon_number "2"; gene_source "ena"; gene_biotype "protein_coding"; transcript_source "ena"; transcript_biotype "protein_coding"; exon_id "AFR92170-2";
1	ena	CDS	97164	97315	.	+	0	gene_id "CNAG_00032"; transcript_id "AFR92170"; exon_number "2"; gene_source "ena"; gene_biotype "protein_coding"; transcript_source "ena"; transcript_biotype "protein_coding"; protein_id "AFR92170"; protein_version "1";
1	ena	exon	97363	99351	.	+	.	gene_id "CNAG_00032"; transcript_id "AFR92170"; exon_number "3"; gene_source "ena"; gene_biotype "protein_coding"; transcript_source "ena"; transcript_biotype "protein_coding"; exon_id "AFR92170-3";
1	ena	CDS	97363	97867	.	+	1	gene_id "CNAG_00032"; transcript_id "AFR92170"; exon_number "3"; gene_source "ena"; gene_biotype "protein_coding"; transcript_source "ena"; transcript_biotype "protein_coding"; protein_id "AFR92170"; protein_version "1";
1	ena	five_prime_utr	96762	96968	.	+	.	gene_id "CNAG_00032"; transcript_id "AFR92170"; gene_source "ena"; gene_biotype "protein_coding"; transcript_source "ena"; transcript_biotype "protein_coding";
1	ena	three_prime_utr	97868	99351	.	+	.	gene_id "CNAG_00032"; transcript_id "AFR92170"; gene_source "ena"; gene_biotype "protein_coding"; transcript_source "ena"; transcript_biotype "protein_coding";
1	ena	gene	99045	99578	.	-	.	gene_id "CNAG_00033"; gene_source "ena"; gene_biotype "protein_coding";
1	ena	transcript	99045	99578	.	-	.	gene_id "CNAG_00033"; transcript_id "AFR92171"; gene_source "ena"; gene_biotype "protein_coding"; transcript_source "ena"; transcript_biotype "protein_coding";
1	ena	exon	99560	99578	.	-	.	gene_id "CNAG_00033"; transcript_id "AFR92171"; exon_number "1"; gene_source "ena"; gene_biotype "protein_coding"; transcript_source "ena"; transcript_biotype "protein_coding"; exon_id "AFR92171-1";
1	ena	CDS	99560	99578	.	-	0	gene_id "CNAG_00033"; transcript_id "AFR92171"; exon_number "1"; gene_source "ena"; gene_biotype "protein_coding"; transcript_source "ena"; transcript_biotype "protein_coding"; protein_id "AFR92171"; protein_version "1";
1	ena	start_codon	99576	99578	.	-	0	gene_id "CNAG_00033"; transcript_id "AFR92171"; exon_number "1"; gene_source "ena"; gene_biotype "protein_coding"; transcript_source "ena"; transcript_biotype "protein_coding";
1	ena	exon	99045	99505	.	-	.	gene_id "CNAG_00033"; transcript_id "AFR92171"; exon_number "2"; gene_source "ena"; gene_biotype "protein_coding"; transcript_source "ena"; transcript_biotype "protein_coding"; exon_id "AFR92171-2";
1	ena	CDS	99048	99505	.	-	2	gene_id "CNAG_00033"; transcript_id "AFR92171"; exon_number "2"; gene_source "ena"; gene_biotype "protein_coding"; transcript_source "ena"; transcript_biotype "protein_coding"; protein_id "AFR92171"; protein_version "1";
1	ena	stop_codon	99045	99047	.	-	0	gene_id "CNAG_00033"; transcript_id "AFR92171"; exon_number "2"; gene_source "ena"; gene_biotype "protein_coding"; transcript_source "ena"; transcript_biotype "protein_coding";
1	ena	gene	99984	100467	.	+	.	gene_id "CNAG_07306"; gene_source "ena"; gene_biotype "protein_coding";
1	ena	transcript	99984	100467	.	+	.	gene_id "CNAG_07306"; transcript_id "AFR92172"; gene_source "ena"; gene_biotype "protein_coding"; transcript_source "ena"; transcript_biotype "protein_coding";
1	ena	exon	99984	100169	.	+	.	gene_id "CNAG_07306"; transcript_id "AFR92172"; exon_number "1"; gene_source "ena"; gene_biotype "protein_coding"; transcript_source "ena"; transcript_biotype "protein_coding"; exon_id "AFR92172-1";
1	ena	CDS	99984	100169	.	+	0	gene_id "CNAG_07306"; transcript_id "AFR92172"; exon_number "1"; gene_source "ena"; gene_biotype "protein_coding"; transcript_source "ena"; transcript_biotype "protein_coding"; protein_id "AFR92172"; protein_version "1";
1	ena	start_codon	99984	99986	.	+	0	gene_id "CNAG_07306"; transcript_id "AFR92172"; exon_number "1"; gene_source "ena"; gene_biotype "protein_coding"; transcript_source "ena"; transcript_biotype "protein_coding";
1	ena	exon	100208	100467	.	+	.	gene_id "CNAG_07306"; transcript_id "AFR92172"; exon_number "2"; gene_source "ena"; gene_biotype "protein_coding"; transcript_source "ena"; transcript_biotype "protein_coding"; exon_id "AFR92172-2";
1	ena	CDS	100208	100396	.	+	0	gene_id "CNAG_07306"; transcript_id "AFR92172"; exon_number "2"; gene_source "ena"; gene_biotype "protein_coding"; transcript_source "ena"; transcript_biotype "protein_coding"; protein_id "AFR92172"; protein_version "1";
1	ena	three_prime_utr	100397	100467	.	+	.	gene_id "CNAG_07306"; transcript_id "AFR92172"; gene_source "ena"; gene_biotype "protein_coding"; transcript_source "ena"; transcript_biotype "protein_coding";
1	ena	gene	101060	102696	.	+	.	gene_id "CNAG_00034"; gene_source "ena"; gene_biotype "protein_coding";
1	ena	transcript	101060	102696	.	+	.	gene_id "CNAG_00034"; transcript_id "AFR92173"; gene_source "ena"; gene_biotype "protein_coding"; transcript_source "ena"; transcript_biotype "protein_coding";
1	ena	exon	101060	101375	.	+	.	gene_id "CNAG_00034"; transcript_id "AFR92173"; exon_number "1"; gene_source "ena"; gene_biotype "protein_coding"; transcript_source "ena"; transcript_biotype "protein_coding"; exon_id "AFR92173-1";
1	ena	CDS	101235	101375	.	+	0	gene_id "CNAG_00034"; transcript_id "AFR92173"; exon_number "1"; gene_source "ena"; gene_biotype "protein_coding"; transcript_source "ena"; transcript_biotype "protein_coding"; protein_id "AFR92173"; protein_version "1";
1	ena	start_codon	101235	101237	.	+	0	gene_id "CNAG_00034"; transcript_id "AFR92173"; exon_number "1"; gene_source "ena"; gene_biotype "protein_coding"; transcript_source "ena"; transcript_biotype "protein_coding";
1	ena	exon	101671	101790	.	+	.	gene_id "CNAG_00034"; transcript_id "AFR92173"; exon_number "2"; gene_source "ena"; gene_biotype "protein_coding"; transcript_source "ena"; transcript_biotype "protein_coding"; exon_id "AFR92173-2";
1	ena	CDS	101671	101790	.	+	0	gene_id "CNAG_00034"; transcript_id "AFR92173"; exon_number "2"; gene_source "ena"; gene_biotype "protein_coding"; transcript_source "ena"; transcript_biotype "protein_coding"; protein_id "AFR92173"; protein_version "1";
1	ena	exon	101846	101939	.	+	.	gene_id "CNAG_00034"; transcript_id "AFR92173"; exon_number "3"; gene_source "ena"; gene_biotype "protein_coding"; transcript_source "ena"; transcript_biotype "protein_coding"; exon_id "AFR92173-3";
1	ena	CDS	101846	101939	.	+	0	gene_id "CNAG_00034"; transcript_id "AFR92173"; exon_number "3"; gene_source "ena"; gene_biotype "protein_coding"; transcript_source "ena"; transcript_biotype "protein_coding"; protein_id "AFR92173"; protein_version "1";
1	ena	exon	101993	102169	.	+	.	gene_id "CNAG_00034"; transcript_id "AFR92173"; exon_number "4"; gene_source "ena"; gene_biotype "protein_coding"; transcript_source "ena"; transcript_biotype "protein_coding"; exon_id "AFR92173-4";
1	ena	CDS	101993	102169	.	+	2	gene_id "CNAG_00034"; transcript_id "AFR92173"; exon_number "4"; gene_source "ena"; gene_biotype "protein_coding"; transcript_source "ena"; transcript_biotype "protein_coding"; protein_id "AFR92173"; protein_version "1";
1	ena	exon	102220	102696	.	+	.	gene_id "CNAG_00034"; transcript_id "AFR92173"; exon_number "5"; gene_source "ena"; gene_biotype "protein_coding"; transcript_source "ena"; transcript_biotype "protein_coding"; exon_id "AFR92173-5";
1	ena	CDS	102220	102263	.	+	2	gene_id "CNAG_00034"; transcript_id "AFR92173"; exon_number "5"; gene_source "ena"; gene_biotype "protein_coding"; transcript_source "ena"; transcript_biotype "protein_coding"; protein_id "AFR92173"; protein_version "1";
1	ena	five_prime_utr	101060	101234	.	+	.	gene_id "CNAG_00034"; transcript_id "AFR92173"; gene_source "ena"; gene_biotype "protein_coding"; transcript_source "ena"; transcript_biotype "protein_coding";
1	ena	three_prime_utr	102264	102696	.	+	.	gene_id "CNAG_00034"; transcript_id "AFR92173"; gene_source "ena"; gene_biotype "protein_coding"; transcript_source "ena"; transcript_biotype "protein_coding";
1	ena	gene	103866	108818	.	+	.	gene_id "CNAG_00035"; gene_source "ena"; gene_biotype "protein_coding";
1	ena	transcript	103866	108818	.	+	.	gene_id "CNAG_00035"; transcript_id "AFR92174"; gene_source "ena"; gene_biotype "protein_coding"; transcript_source "ena"; transcript_biotype "protein_coding";
1	ena	exon	103866	106457	.	+	.	gene_id "CNAG_00035"; transcript_id "AFR92174"; exon_number "1"; gene_source "ena"; gene_biotype "protein_coding"; transcript_source "ena"; transcript_biotype "protein_coding"; exon_id "AFR92174-1";
1	ena	CDS	106378	106457	.	+	0	gene_id "CNAG_00035"; transcript_id "AFR92174"; exon_number "1"; gene_source "ena"; gene_biotype "protein_coding"; transcript_source "ena"; transcript_biotype "protein_coding"; protein_id "AFR92174"; protein_version "1";
1	ena	start_codon	106378	106380	.	+	0	gene_id "CNAG_00035"; transcript_id "AFR92174"; exon_number "1"; gene_source "ena"; gene_biotype "protein_coding"; transcript_source "ena"; transcript_biotype "protein_coding";
1	ena	exon	106509	106604	.	+	.	gene_id "CNAG_00035"; transcript_id "AFR92174"; exon_number "2"; gene_source "ena"; gene_biotype "protein_coding"; transcript_source "ena"; transcript_biotype "protein_coding"; exon_id "AFR92174-2";
1	ena	CDS	106509	106604	.	+	1	gene_id "CNAG_00035"; transcript_id "AFR92174"; exon_number "2"; gene_source "ena"; gene_biotype "protein_coding"; transcript_source "ena"; transcript_biotype "protein_coding"; protein_id "AFR92174"; protein_version "1";
1	ena	exon	106656	107337	.	+	.	gene_id "CNAG_00035"; transcript_id "AFR92174"; exon_number "3"; gene_source "ena"; gene_biotype "protein_coding"; transcript_source "ena"; transcript_biotype "protein_coding"; exon_id "AFR92174-3";
1	ena	CDS	106656	107337	.	+	1	gene_id "CNAG_00035"; transcript_id "AFR92174"; exon_number "3"; gene_source "ena"; gene_biotype "protein_coding"; transcript_source "ena"; transcript_biotype "protein_coding"; protein_id "AFR92174"; protein_version "1";
1	ena	exon	107389	107466	.	+	.	gene_id "CNAG_00035"; transcript_id "AFR92174"; exon_number "4"; gene_source "ena"; gene_biotype "protein_coding"; transcript_source "ena"; transcript_biotype "protein_coding"; exon_id "AFR92174-4";
1	ena	CDS	107389	107466	.	+	0	gene_id "CNAG_00035"; transcript_id "AFR92174"; exon_number "4"; gene_source "ena"; gene_biotype "protein_coding"; transcript_source "ena"; transcript_biotype "protein_coding"; protein_id "AFR92174"; protein_version "1";
1	ena	exon	107518	107695	.	+	.	gene_id "CNAG_00035"; transcript_id "AFR92174"; exon_number "5"; gene_source "ena"; gene_biotype "protein_coding"; transcript_source "ena"; transcript_biotype "protein_coding"; exon_id "AFR92174-5";
1	ena	CDS	107518	107695	.	+	0	gene_id "CNAG_00035"; transcript_id "AFR92174"; exon_number "5"; gene_source "ena"; gene_biotype "protein_coding"; transcript_source "ena"; transcript_biotype "protein_coding"; protein_id "AFR92174"; protein_version "1";
1	ena	exon	107759	108818	.	+	.	gene_id "CNAG_00035"; transcript_id "AFR92174"; exon_number "6"; gene_source "ena"; gene_biotype "protein_coding"; transcript_source "ena"; transcript_biotype "protein_coding"; exon_id "AFR92174-6";
1	ena	CDS	107759	108225	.	+	2	gene_id "CNAG_00035"; transcript_id "AFR92174"; exon_number "6"; gene_source "ena"; gene_biotype "protein_coding"; transcript_source "ena"; transcript_biotype "protein_coding"; protein_id "AFR92174"; protein_version "1";
1	ena	five_prime_utr	103866	106377	.	+	.	gene_id "CNAG_00035"; transcript_id "AFR92174"; gene_source "ena"; gene_biotype "protein_coding"; transcript_source "ena"; transcript_biotype "protein_coding";
1	ena	three_prime_utr	108226	108818	.	+	.	gene_id "CNAG_00035"; transcript_id "AFR92174"; gene_source "ena"; gene_biotype "protein_coding"; transcript_source "ena"; transcript_biotype "protein_coding";
1	ena	gene	108777	110347	.	-	.	gene_id "CNAG_00036"; gene_source "ena"; gene_biotype "protein_coding";
1	ena	transcript	108777	110347	.	-	.	gene_id "CNAG_00036"; transcript_id "AFR92175"; gene_source "ena"; gene_biotype "protein_coding"; transcript_source "ena"; transcript_biotype "protein_coding";
1	ena	exon	110284	110347	.	-	.	gene_id "CNAG_00036"; transcript_id "AFR92175"; exon_number "1"; gene_source "ena"; gene_biotype "protein_coding"; transcript_source "ena"; transcript_biotype "protein_coding"; exon_id "AFR92175-1";
1	ena	CDS	110284	110289	.	-	0	gene_id "CNAG_00036"; transcript_id "AFR92175"; exon_number "1"; gene_source "ena"; gene_biotype "protein_coding"; transcript_source "ena"; transcript_biotype "protein_coding"; protein_id "AFR92175"; protein_version "1";
1	ena	start_codon	110287	110289	.	-	0	gene_id "CNAG_00036"; transcript_id "AFR92175"; exon_number "1"; gene_source "ena"; gene_biotype "protein_coding"; transcript_source "ena"; transcript_biotype "protein_coding";
1	ena	exon	110204	110238	.	-	.	gene_id "CNAG_00036"; transcript_id "AFR92175"; exon_number "2"; gene_source "ena"; gene_biotype "protein_coding"; transcript_source "ena"; transcript_biotype "protein_coding"; exon_id "AFR92175-2";
1	ena	CDS	110204	110238	.	-	0	gene_id "CNAG_00036"; transcript_id "AFR92175"; exon_number "2"; gene_source "ena"; gene_biotype "protein_coding"; transcript_source "ena"; transcript_biotype "protein_coding"; protein_id "AFR92175"; protein_version "1";
1	ena	exon	109926	110156	.	-	.	gene_id "CNAG_00036"; transcript_id "AFR92175"; exon_number "3"; gene_source "ena"; gene_biotype "protein_coding"; transcript_source "ena"; transcript_biotype "protein_coding"; exon_id "AFR92175-3";
1	ena	CDS	109926	110156	.	-	1	gene_id "CNAG_00036"; transcript_id "AFR92175"; exon_number "3"; gene_source "ena"; gene_biotype "protein_coding"; transcript_source "ena"; transcript_biotype "protein_coding"; protein_id "AFR92175"; protein_version "1";
1	ena	exon	109554	109846	.	-	.	gene_id "CNAG_00036"; transcript_id "AFR92175"; exon_number "4"; gene_source "ena"; gene_biotype "protein_coding"; transcript_source "ena"; transcript_biotype "protein_coding"; exon_id "AFR92175-4";
1	ena	CDS	109554	109846	.	-	1	gene_id "CNAG_00036"; transcript_id "AFR92175"; exon_number "4"; gene_source "ena"; gene_biotype "protein_coding"; transcript_source "ena"; transcript_biotype "protein_coding"; protein_id "AFR92175"; protein_version "1";
1	ena	exon	109456	109500	.	-	.	gene_id "CNAG_00036"; transcript_id "AFR92175"; exon_number "5"; gene_source "ena"; gene_biotype "protein_coding"; transcript_source "ena"; transcript_biotype "protein_coding"; exon_id "AFR92175-5";
1	ena	CDS	109456	109500	.	-	2	gene_id "CNAG_00036"; transcript_id "AFR92175"; exon_number "5"; gene_source "ena"; gene_biotype "protein_coding"; transcript_source "ena"; transcript_biotype "protein_coding"; protein_id "AFR92175"; protein_version "1";
1	ena	exon	109382	109383	.	-	.	gene_id "CNAG_00036"; transcript_id "AFR92175"; exon_number "6"; gene_source "ena"; gene_biotype "protein_coding"; transcript_source "ena"; transcript_biotype "protein_coding"; exon_id "AFR92175-6";
1	ena	CDS	109382	109383	.	-	2	gene_id "CNAG_00036"; transcript_id "AFR92175"; exon_number "6"; gene_source "ena"; gene_biotype "protein_coding"; transcript_source "ena"; transcript_biotype "protein_coding"; protein_id "AFR92175"; protein_version "1";
1	ena	exon	109269	109301	.	-	.	gene_id "CNAG_00036"; transcript_id "AFR92175"; exon_number "7"; gene_source "ena"; gene_biotype "protein_coding"; transcript_source "ena"; transcript_biotype "protein_coding"; exon_id "AFR92175-7";
1	ena	CDS	109269	109301	.	-	0	gene_id "CNAG_00036"; transcript_id "AFR92175"; exon_number "7"; gene_source "ena"; gene_biotype "protein_coding"; transcript_source "ena"; transcript_biotype "protein_coding"; protein_id "AFR92175"; protein_version "1";
1	ena	exon	108777	109195	.	-	.	gene_id "CNAG_00036"; transcript_id "AFR92175"; exon_number "8"; gene_source "ena"; gene_biotype "protein_coding"; transcript_source "ena"; transcript_biotype "protein_coding"; exon_id "AFR92175-8";
1	ena	CDS	108971	109195	.	-	0	gene_id "CNAG_00036"; transcript_id "AFR92175"; exon_number "8"; gene_source "ena"; gene_biotype "protein_coding"; transcript_source "ena"; transcript_biotype "protein_coding"; protein_id "AFR92175"; protein_version "1";
1	ena	five_prime_utr	110290	110347	.	-	.	gene_id "CNAG_00036"; transcript_id "AFR92175"; gene_source "ena"; gene_biotype "protein_coding"; transcript_source "ena"; transcript_biotype "protein_coding";
1	ena	three_prime_utr	108777	108970	.	-	.	gene_id "CNAG_00036"; transcript_id "AFR92175"; gene_source "ena"; gene_biotype "protein_coding"; transcript_source "ena"; transcript_biotype "protein_coding";
1	ena	gene	110921	112468	.	+	.	gene_id "CNAG_07307"; gene_source "ena"; gene_biotype "protein_coding";
1	ena	transcript	110921	112468	.	+	.	gene_id "CNAG_07307"; transcript_id "AFR92176"; gene_source "ena"; gene_biotype "protein_coding"; transcript_source "ena"; transcript_biotype "protein_coding";
1	ena	exon	110921	110976	.	+	.	gene_id "CNAG_07307"; transcript_id "AFR92176"; exon_number "1"; gene_source "ena"; gene_biotype "protein_coding"; transcript_source "ena"; transcript_biotype "protein_coding"; exon_id "AFR92176-1";
1	ena	CDS	110921	110976	.	+	0	gene_id "CNAG_07307"; transcript_id "AFR92176"; exon_number "1"; gene_source "ena"; gene_biotype "protein_coding"; transcript_source "ena"; transcript_biotype "protein_coding"; protein_id "AFR92176"; protein_version "1";
1	ena	start_codon	110921	110923	.	+	0	gene_id "CNAG_07307"; transcript_id "AFR92176"; exon_number "1"; gene_source "ena"; gene_biotype "protein_coding"; transcript_source "ena"; transcript_biotype "protein_coding";
1	ena	exon	111340	111434	.	+	.	gene_id "CNAG_07307"; transcript_id "AFR92176"; exon_number "2"; gene_source "ena"; gene_biotype "protein_coding"; transcript_source "ena"; transcript_biotype "protein_coding"; exon_id "AFR92176-2";
1	ena	CDS	111340	111434	.	+	1	gene_id "CNAG_07307"; transcript_id "AFR92176"; exon_number "2"; gene_source "ena"; gene_biotype "protein_coding"; transcript_source "ena"; transcript_biotype "protein_coding"; protein_id "AFR92176"; protein_version "1";
1	ena	exon	111818	111842	.	+	.	gene_id "CNAG_07307"; transcript_id "AFR92176"; exon_number "3"; gene_source "ena"; gene_biotype "protein_coding"; transcript_source "ena"; transcript_biotype "protein_coding"; exon_id "AFR92176-3";
1	ena	CDS	111818	111842	.	+	2	gene_id "CNAG_07307"; transcript_id "AFR92176"; exon_number "3"; gene_source "ena"; gene_biotype "protein_coding"; transcript_source "ena"; transcript_biotype "protein_coding"; protein_id "AFR92176"; protein_version "1";
1	ena	exon	112004	112468	.	+	.	gene_id "CNAG_07307"; transcript_id "AFR92176"; exon_number "4"; gene_source "ena"; gene_biotype "protein_coding"; transcript_source "ena"; transcript_biotype "protein_coding"; exon_id "AFR92176-4";
1	ena	CDS	112004	112076	.	+	1	gene_id "CNAG_07307"; transcript_id "AFR92176"; exon_number "4"; gene_source "ena"; gene_biotype "protein_coding"; transcript_source "ena"; transcript_biotype "protein_coding"; protein_id "AFR92176"; protein_version "1";
1	ena	three_prime_utr	112077	112468	.	+	.	gene_id "CNAG_07307"; transcript_id "AFR92176"; gene_source "ena"; gene_biotype "protein_coding"; transcript_source "ena"; transcript_biotype "protein_coding";
1	ena	gene	113347	115885	.	-	.	gene_id "CNAG_00038"; gene_source "ena"; gene_biotype "protein_coding";
1	ena	transcript	113347	115885	.	-	.	gene_id "CNAG_00038"; transcript_id "AFR92177"; gene_source "ena"; gene_biotype "protein_coding"; transcript_source "ena"; transcript_biotype "protein_coding";
1	ena	exon	115435	115885	.	-	.	gene_id "CNAG_00038"; transcript_id "AFR92177"; exon_number "1"; gene_source "ena"; gene_biotype "protein_coding"; transcript_source "ena"; transcript_biotype "protein_coding"; exon_id "AFR92177-1";
1	ena	CDS	115435	115545	.	-	0	gene_id "CNAG_00038"; transcript_id "AFR92177"; exon_number "1"; gene_source "ena"; gene_biotype "protein_coding"; transcript_source "ena"; transcript_biotype "protein_coding"; protein_id "AFR92177"; protein_version "1";
1	ena	start_codon	115543	115545	.	-	0	gene_id "CNAG_00038"; transcript_id "AFR92177"; exon_number "1"; gene_source "ena"; gene_biotype "protein_coding"; transcript_source "ena"; transcript_biotype "protein_coding";
1	ena	exon	115271	115379	.	-	.	gene_id "CNAG_00038"; transcript_id "AFR92177"; exon_number "2"; gene_source "ena"; gene_biotype "protein_coding"; transcript_source "ena"; transcript_biotype "protein_coding"; exon_id "AFR92177-2";
1	ena	CDS	115271	115379	.	-	0	gene_id "CNAG_00038"; transcript_id "AFR92177"; exon_number "2"; gene_source "ena"; gene_biotype "protein_coding"; transcript_source "ena"; transcript_biotype "protein_coding"; protein_id "AFR92177"; protein_version "1";
1	ena	exon	115126	115220	.	-	.	gene_id "CNAG_00038"; transcript_id "AFR92177"; exon_number "3"; gene_source "ena"; gene_biotype "protein_coding"; transcript_source "ena"; transcript_biotype "protein_coding"; exon_id "AFR92177-3";
1	ena	CDS	115126	115220	.	-	2	gene_id "CNAG_00038"; transcript_id "AFR92177"; exon_number "3"; gene_source "ena"; gene_biotype "protein_coding"; transcript_source "ena"; transcript_biotype "protein_coding"; protein_id "AFR92177"; protein_version "1";
1	ena	exon	114984	115070	.	-	.	gene_id "CNAG_00038"; transcript_id "AFR92177"; exon_number "4"; gene_source "ena"; gene_biotype "protein_coding"; transcript_source "ena"; transcript_biotype "protein_coding"; exon_id "AFR92177-4";
1	ena	CDS	114984	115070	.	-	0	gene_id "CNAG_00038"; transcript_id "AFR92177"; exon_number "4"; gene_source "ena"; gene_biotype "protein_coding"; transcript_source "ena"; transcript_biotype "protein_coding"; protein_id "AFR92177"; protein_version "1";
1	ena	exon	114871	114927	.	-	.	gene_id "CNAG_00038"; transcript_id "AFR92177"; exon_number "5"; gene_source "ena"; gene_biotype "protein_coding"; transcript_source "ena"; transcript_biotype "protein_coding"; exon_id "AFR92177-5";
1	ena	CDS	114871	114927	.	-	0	gene_id "CNAG_00038"; transcript_id "AFR92177"; exon_number "5"; gene_source "ena"; gene_biotype "protein_coding"; transcript_source "ena"; transcript_biotype "protein_coding"; protein_id "AFR92177"; protein_version "1";
1	ena	exon	114439	114820	.	-	.	gene_id "CNAG_00038"; transcript_id "AFR92177"; exon_number "6"; gene_source "ena"; gene_biotype "protein_coding"; transcript_source "ena"; transcript_biotype "protein_coding"; exon_id "AFR92177-6";
1	ena	CDS	114439	114820	.	-	0	gene_id "CNAG_00038"; transcript_id "AFR92177"; exon_number "6"; gene_source "ena"; gene_biotype "protein_coding"; transcript_source "ena"; transcript_biotype "protein_coding"; protein_id "AFR92177"; protein_version "1";
1	ena	exon	114218	114390	.	-	.	gene_id "CNAG_00038"; transcript_id "AFR92177"; exon_number "7"; gene_source "ena"; gene_biotype "protein_coding"; transcript_source "ena"; transcript_biotype "protein_coding"; exon_id "AFR92177-7";
1	ena	CDS	114218	114390	.	-	2	gene_id "CNAG_00038"; transcript_id "AFR92177"; exon_number "7"; gene_source "ena"; gene_biotype "protein_coding"; transcript_source "ena"; transcript_biotype "protein_coding"; protein_id "AFR92177"; protein_version "1";
1	ena	exon	113347	114156	.	-	.	gene_id "CNAG_00038"; transcript_id "AFR92177"; exon_number "8"; gene_source "ena"; gene_biotype "protein_coding"; transcript_source "ena"; transcript_biotype "protein_coding"; exon_id "AFR92177-8";
1	ena	CDS	114076	114156	.	-	0	gene_id "CNAG_00038"; transcript_id "AFR92177"; exon_number "8"; gene_source "ena"; gene_biotype "protein_coding"; transcript_source "ena"; transcript_biotype "protein_coding"; protein_id "AFR92177"; protein_version "1";
1	ena	stop_codon	114073	114075	.	-	0	gene_id "CNAG_00038"; transcript_id "AFR92177"; exon_number "8"; gene_source "ena"; gene_biotype "protein_coding"; transcript_source "ena"; transcript_biotype "protein_coding";
1	ena	five_prime_utr	115546	115885	.	-	.	gene_id "CNAG_00038"; transcript_id "AFR92177"; gene_source "ena"; gene_biotype "protein_coding"; transcript_source "ena"; transcript_biotype "protein_coding";
1	ena	three_prime_utr	113347	114072	.	-	.	gene_id "CNAG_00038"; transcript_id "AFR92177"; gene_source "ena"; gene_biotype "protein_coding"; transcript_source "ena"; transcript_biotype "protein_coding";
1	ena	gene	117229	118263	.	-	.	gene_id "CNAG_12005"; gene_name "CNAG_12005"; gene_source "ena"; gene_biotype "ncRNA";
1	ena	transcript	117229	118263	.	-	.	gene_id "CNAG_12005"; transcript_id "CNAG_12005-1"; gene_name "CNAG_12005"; gene_source "ena"; gene_biotype "ncRNA"; transcript_name "CNAG_12005"; transcript_source "ena"; transcript_biotype "ncRNA";
1	ena	exon	117641	118263	.	-	.	gene_id "CNAG_12005"; transcript_id "CNAG_12005-1"; exon_number "1"; gene_name "CNAG_12005"; gene_source "ena"; gene_biotype "ncRNA"; transcript_name "CNAG_12005"; transcript_source "ena"; transcript_biotype "ncRNA"; exon_id "CNAG_12005-1-1";
1	ena	exon	117229	117577	.	-	.	gene_id "CNAG_12005"; transcript_id "CNAG_12005-1"; exon_number "2"; gene_name "CNAG_12005"; gene_source "ena"; gene_biotype "ncRNA"; transcript_name "CNAG_12005"; transcript_source "ena"; transcript_biotype "ncRNA"; exon_id "CNAG_12005-1-2";
1	ena	gene	118380	123586	.	+	.	gene_id "CNAG_00039"; gene_source "ena"; gene_biotype "protein_coding";
1	ena	transcript	118380	123586	.	+	.	gene_id "CNAG_00039"; transcript_id "AFR92178"; gene_source "ena"; gene_biotype "protein_coding"; transcript_source "ena"; transcript_biotype "protein_coding";
1	ena	exon	118380	121118	.	+	.	gene_id "CNAG_00039"; transcript_id "AFR92178"; exon_number "1"; gene_source "ena"; gene_biotype "protein_coding"; transcript_source "ena"; transcript_biotype "protein_coding"; exon_id "AFR92178-1";
1	ena	CDS	120725	121118	.	+	0	gene_id "CNAG_00039"; transcript_id "AFR92178"; exon_number "1"; gene_source "ena"; gene_biotype "protein_coding"; transcript_source "ena"; transcript_biotype "protein_coding"; protein_id "AFR92178"; protein_version "1";
1	ena	start_codon	120725	120727	.	+	0	gene_id "CNAG_00039"; transcript_id "AFR92178"; exon_number "1"; gene_source "ena"; gene_biotype "protein_coding"; transcript_source "ena"; transcript_biotype "protein_coding";
1	ena	exon	121173	122654	.	+	.	gene_id "CNAG_00039"; transcript_id "AFR92178"; exon_number "2"; gene_source "ena"; gene_biotype "protein_coding"; transcript_source "ena"; transcript_biotype "protein_coding"; exon_id "AFR92178-2";
1	ena	CDS	121173	122654	.	+	2	gene_id "CNAG_00039"; transcript_id "AFR92178"; exon_number "2"; gene_source "ena"; gene_biotype "protein_coding"; transcript_source "ena"; transcript_biotype "protein_coding"; protein_id "AFR92178"; protein_version "1";
1	ena	exon	122714	123586	.	+	.	gene_id "CNAG_00039"; transcript_id "AFR92178"; exon_number "3"; gene_source "ena"; gene_biotype "protein_coding"; transcript_source "ena"; transcript_biotype "protein_coding"; exon_id "AFR92178-3";
1	ena	CDS	122714	123282	.	+	2	gene_id "CNAG_00039"; transcript_id "AFR92178"; exon_number "3"; gene_source "ena"; gene_biotype "protein_coding"; transcript_source "ena"; transcript_biotype "protein_coding"; protein_id "AFR92178"; protein_version "1";
1	ena	five_prime_utr	118380	120724	.	+	.	gene_id "CNAG_00039"; transcript_id "AFR92178"; gene_source "ena"; gene_biotype "protein_coding"; transcript_source "ena"; transcript_biotype "protein_coding";
1	ena	three_prime_utr	123283	123586	.	+	.	gene_id "CNAG_00039"; transcript_id "AFR92178"; gene_source "ena"; gene_biotype "protein_coding"; transcript_source "ena"; transcript_biotype "protein_coding";
1	ena	gene	123979	126449	.	+	.	gene_id "CNAG_00040"; gene_source "ena"; gene_biotype "protein_coding";
1	ena	transcript	123979	126449	.	+	.	gene_id "CNAG_00040"; transcript_id "AFR92179"; gene_source "ena"; gene_biotype "protein_coding"; transcript_source "ena"; transcript_biotype "protein_coding";
1	ena	exon	123979	124234	.	+	.	gene_id "CNAG_00040"; transcript_id "AFR92179"; exon_number "1"; gene_source "ena"; gene_biotype "protein_coding"; transcript_source "ena"; transcript_biotype "protein_coding"; exon_id "AFR92179-1";
1	ena	CDS	124079	124234	.	+	0	gene_id "CNAG_00040"; transcript_id "AFR92179"; exon_number "1"; gene_source "ena"; gene_biotype "protein_coding"; transcript_source "ena"; transcript_biotype "protein_coding"; protein_id "AFR92179"; protein_version "1";
1	ena	start_codon	124079	124081	.	+	0	gene_id "CNAG_00040"; transcript_id "AFR92179"; exon_number "1"; gene_source "ena"; gene_biotype "protein_coding"; transcript_source "ena"; transcript_biotype "protein_coding";
1	ena	exon	124333	124572	.	+	.	gene_id "CNAG_00040"; transcript_id "AFR92179"; exon_number "2"; gene_source "ena"; gene_biotype "protein_coding"; transcript_source "ena"; transcript_biotype "protein_coding"; exon_id "AFR92179-2";
1	ena	CDS	124333	124572	.	+	0	gene_id "CNAG_00040"; transcript_id "AFR92179"; exon_number "2"; gene_source "ena"; gene_biotype "protein_coding"; transcript_source "ena"; transcript_biotype "protein_coding"; protein_id "AFR92179"; protein_version "1";
1	ena	exon	124627	124704	.	+	.	gene_id "CNAG_00040"; transcript_id "AFR92179"; exon_number "3"; gene_source "ena"; gene_biotype "protein_coding"; transcript_source "ena"; transcript_biotype "protein_coding"; exon_id "AFR92179-3";
1	ena	CDS	124627	124704	.	+	0	gene_id "CNAG_00040"; transcript_id "AFR92179"; exon_number "3"; gene_source "ena"; gene_biotype "protein_coding"; transcript_source "ena"; transcript_biotype "protein_coding"; protein_id "AFR92179"; protein_version "1";
1	ena	exon	124754	125125	.	+	.	gene_id "CNAG_00040"; transcript_id "AFR92179"; exon_number "4"; gene_source "ena"; gene_biotype "protein_coding"; transcript_source "ena"; transcript_biotype "protein_coding"; exon_id "AFR92179-4";
1	ena	CDS	124754	125125	.	+	0	gene_id "CNAG_00040"; transcript_id "AFR92179"; exon_number "4"; gene_source "ena"; gene_biotype "protein_coding"; transcript_source "ena"; transcript_biotype "protein_coding"; protein_id "AFR92179"; protein_version "1";
1	ena	exon	125173	125345	.	+	.	gene_id "CNAG_00040"; transcript_id "AFR92179"; exon_number "5"; gene_source "ena"; gene_biotype "protein_coding"; transcript_source "ena"; transcript_biotype "protein_coding"; exon_id "AFR92179-5";
1	ena	CDS	125173	125345	.	+	0	gene_id "CNAG_00040"; transcript_id "AFR92179"; exon_number "5"; gene_source "ena"; gene_biotype "protein_coding"; transcript_source "ena"; transcript_biotype "protein_coding"; protein_id "AFR92179"; protein_version "1";
1	ena	exon	125398	125524	.	+	.	gene_id "CNAG_00040"; transcript_id "AFR92179"; exon_number "6"; gene_source "ena"; gene_biotype "protein_coding"; transcript_source "ena"; transcript_biotype "protein_coding"; exon_id "AFR92179-6";
1	ena	CDS	125398	125524	.	+	1	gene_id "CNAG_00040"; transcript_id "AFR92179"; exon_number "6"; gene_source "ena"; gene_biotype "protein_coding"; transcript_source "ena"; transcript_biotype "protein_coding"; protein_id "AFR92179"; protein_version "1";
1	ena	exon	125580	125593	.	+	.	gene_id "CNAG_00040"; transcript_id "AFR92179"; exon_number "7"; gene_source "ena"; gene_biotype "protein_coding"; transcript_source "ena"; transcript_biotype "protein_coding"; exon_id "AFR92179-7";
1	ena	CDS	125580	125593	.	+	0	gene_id "CNAG_00040"; transcript_id "AFR92179"; exon_number "7"; gene_source "ena"; gene_biotype "protein_coding"; transcript_source "ena"; transcript_biotype "protein_coding"; protein_id "AFR92179"; protein_version "1";
1	ena	exon	125644	126061	.	+	.	gene_id "CNAG_00040"; transcript_id "AFR92179"; exon_number "8"; gene_source "ena"; gene_biotype "protein_coding"; transcript_source "ena"; transcript_biotype "protein_coding"; exon_id "AFR92179-8";
1	ena	CDS	125644	126061	.	+	1	gene_id "CNAG_00040"; transcript_id "AFR92179"; exon_number "8"; gene_source "ena"; gene_biotype "protein_coding"; transcript_source "ena"; transcript_biotype "protein_coding"; protein_id "AFR92179"; protein_version "1";
1	ena	exon	126123	126449	.	+	.	gene_id "CNAG_00040"; transcript_id "AFR92179"; exon_number "9"; gene_source "ena"; gene_biotype "protein_coding"; transcript_source "ena"; transcript_biotype "protein_coding"; exon_id "AFR92179-9";
1	ena	CDS	126123	126185	.	+	0	gene_id "CNAG_00040"; transcript_id "AFR92179"; exon_number "9"; gene_source "ena"; gene_biotype "protein_coding"; transcript_source "ena"; transcript_biotype "protein_coding"; protein_id "AFR92179"; protein_version "1";
1	ena	stop_codon	126186	126188	.	+	0	gene_id "CNAG_00040"; transcript_id "AFR92179"; exon_number "9"; gene_source "ena"; gene_biotype "protein_coding"; transcript_source "ena"; transcript_biotype "protein_coding";
1	ena	five_prime_utr	123979	124078	.	+	.	gene_id "CNAG_00040"; transcript_id "AFR92179"; gene_source "ena"; gene_biotype "protein_coding"; transcript_source "ena"; transcript_biotype "protein_coding";
1	ena	three_prime_utr	126189	126449	.	+	.	gene_id "CNAG_00040"; transcript_id "AFR92179"; gene_source "ena"; gene_biotype "protein_coding"; transcript_source "ena"; transcript_biotype "protein_coding";
1	ena	gene	126370	128697	.	-	.	gene_id "CNAG_07308"; gene_source "ena"; gene_biotype "protein_coding";
1	ena	transcript	126370	128697	.	-	.	gene_id "CNAG_07308"; transcript_id "AFR92180"; gene_source "ena"; gene_biotype "protein_coding"; transcript_source "ena"; transcript_biotype "protein_coding";
1	ena	exon	128405	128697	.	-	.	gene_id "CNAG_07308"; transcript_id "AFR92180"; exon_number "1"; gene_source "ena"; gene_biotype "protein_coding"; transcript_source "ena"; transcript_biotype "protein_coding"; exon_id "AFR92180-1";
1	ena	CDS	128405	128651	.	-	0	gene_id "CNAG_07308"; transcript_id "AFR92180"; exon_number "1"; gene_source "ena"; gene_biotype "protein_coding"; transcript_source "ena"; transcript_biotype "protein_coding"; protein_id "AFR92180"; protein_version "1";
1	ena	start_codon	128649	128651	.	-	0	gene_id "CNAG_07308"; transcript_id "AFR92180"; exon_number "1"; gene_source "ena"; gene_biotype "protein_coding"; transcript_source "ena"; transcript_biotype "protein_coding";
1	ena	exon	128126	128330	.	-	.	gene_id "CNAG_07308"; transcript_id "AFR92180"; exon_number "2"; gene_source "ena"; gene_biotype "protein_coding"; transcript_source "ena"; transcript_biotype "protein_coding"; exon_id "AFR92180-2";
1	ena	CDS	128126	128330	.	-	2	gene_id "CNAG_07308"; transcript_id "AFR92180"; exon_number "2"; gene_source "ena"; gene_biotype "protein_coding"; transcript_source "ena"; transcript_biotype "protein_coding"; protein_id "AFR92180"; protein_version "1";
1	ena	exon	127822	128058	.	-	.	gene_id "CNAG_07308"; transcript_id "AFR92180"; exon_number "3"; gene_source "ena"; gene_biotype "protein_coding"; transcript_source "ena"; transcript_biotype "protein_coding"; exon_id "AFR92180-3";
1	ena	CDS	127822	128058	.	-	1	gene_id "CNAG_07308"; transcript_id "AFR92180"; exon_number "3"; gene_source "ena"; gene_biotype "protein_coding"; transcript_source "ena"; transcript_biotype "protein_coding"; protein_id "AFR92180"; protein_version "1";
1	ena	exon	127353	127746	.	-	.	gene_id "CNAG_07308"; transcript_id "AFR92180"; exon_number "4"; gene_source "ena"; gene_biotype "protein_coding"; transcript_source "ena"; transcript_biotype "protein_coding"; exon_id "AFR92180-4";
1	ena	CDS	127353	127746	.	-	1	gene_id "CNAG_07308"; transcript_id "AFR92180"; exon_number "4"; gene_source "ena"; gene_biotype "protein_coding"; transcript_source "ena"; transcript_biotype "protein_coding"; protein_id "AFR92180"; protein_version "1";
1	ena	exon	126926	127226	.	-	.	gene_id "CNAG_07308"; transcript_id "AFR92180"; exon_number "5"; gene_source "ena"; gene_biotype "protein_coding"; transcript_source "ena"; transcript_biotype "protein_coding"; exon_id "AFR92180-5";
1	ena	CDS	126926	127226	.	-	0	gene_id "CNAG_07308"; transcript_id "AFR92180"; exon_number "5"; gene_source "ena"; gene_biotype "protein_coding"; transcript_source "ena"; transcript_biotype "protein_coding"; protein_id "AFR92180"; protein_version "1";
1	ena	exon	126370	126748	.	-	.	gene_id "CNAG_07308"; transcript_id "AFR92180"; exon_number "6"; gene_source "ena"; gene_biotype "protein_coding"; transcript_source "ena"; transcript_biotype "protein_coding"; exon_id "AFR92180-6";
1	ena	CDS	126495	126748	.	-	2	gene_id "CNAG_07308"; transcript_id "AFR92180"; exon_number "6"; gene_source "ena"; gene_biotype "protein_coding"; transcript_source "ena"; transcript_biotype "protein_coding"; protein_id "AFR92180"; protein_version "1";
1	ena	five_prime_utr	128652	128697	.	-	.	gene_id "CNAG_07308"; transcript_id "AFR92180"; gene_source "ena"; gene_biotype "protein_coding"; transcript_source "ena"; transcript_biotype "protein_coding";
1	ena	three_prime_utr	126370	126494	.	-	.	gene_id "CNAG_07308"; transcript_id "AFR92180"; gene_source "ena"; gene_biotype "protein_coding"; transcript_source "ena"; transcript_biotype "protein_coding";
1	ena	gene	126493	128723	.	+	.	gene_id "CNAG_12006"; gene_name "CNAG_12006"; gene_source "ena"; gene_biotype "ncRNA";
1	ena	transcript	126493	128723	.	+	.	gene_id "CNAG_12006"; transcript_id "CNAG_12006-1"; gene_name "CNAG_12006"; gene_source "ena"; gene_biotype "ncRNA"; transcript_name "CNAG_12006"; transcript_source "ena"; transcript_biotype "ncRNA";
1	ena	exon	126493	128350	.	+	.	gene_id "CNAG_12006"; transcript_id "CNAG_12006-1"; exon_number "1"; gene_name "CNAG_12006"; gene_source "ena"; gene_biotype "ncRNA"; transcript_name "CNAG_12006"; transcript_source "ena"; transcript_biotype "ncRNA"; exon_id "CNAG_12006-1-1";
1	ena	exon	128414	128723	.	+	.	gene_id "CNAG_12006"; transcript_id "CNAG_12006-1"; exon_number "2"; gene_name "CNAG_12006"; gene_source "ena"; gene_biotype "ncRNA"; transcript_name "CNAG_12006"; transcript_source "ena"; transcript_biotype "ncRNA"; exon_id "CNAG_12006-1-2";
1	ena	gene	128932	132396	.	-	.	gene_id "CNAG_00043"; gene_source "ena"; gene_biotype "protein_coding";
1	ena	transcript	128932	132396	.	-	.	gene_id "CNAG_00043"; transcript_id "AGV15264"; gene_source "ena"; gene_biotype "protein_coding"; transcript_source "ena"; transcript_biotype "protein_coding";
1	ena	exon	131209	132396	.	-	.	gene_id "CNAG_00043"; transcript_id "AGV15264"; exon_number "1"; gene_source "ena"; gene_biotype "protein_coding"; transcript_source "ena"; transcript_biotype "protein_coding"; exon_id "AGV15264-1";
1	ena	CDS	131209	132334	.	-	0	gene_id "CNAG_00043"; transcript_id "AGV15264"; exon_number "1"; gene_source "ena"; gene_biotype "protein_coding"; transcript_source "ena"; transcript_biotype "protein_coding"; protein_id "AGV15264"; protein_version "1";
1	ena	start_codon	132332	132334	.	-	0	gene_id "CNAG_00043"; transcript_id "AGV15264"; exon_number "1"; gene_source "ena"; gene_biotype "protein_coding"; transcript_source "ena"; transcript_biotype "protein_coding";
1	ena	exon	128932	131137	.	-	.	gene_id "CNAG_00043"; transcript_id "AGV15264"; exon_number "2"; gene_source "ena"; gene_biotype "protein_coding"; transcript_source "ena"; transcript_biotype "protein_coding"; exon_id "AGV15264-2";
1	ena	CDS	130356	131137	.	-	2	gene_id "CNAG_00043"; transcript_id "AGV15264"; exon_number "2"; gene_source "ena"; gene_biotype "protein_coding"; transcript_source "ena"; transcript_biotype "protein_coding"; protein_id "AGV15264"; protein_version "1";
1	ena	five_prime_utr	132335	132396	.	-	.	gene_id "CNAG_00043"; transcript_id "AGV15264"; gene_source "ena"; gene_biotype "protein_coding"; transcript_source "ena"; transcript_biotype "protein_coding";
1	ena	three_prime_utr	128932	130355	.	-	.	gene_id "CNAG_00043"; transcript_id "AGV15264"; gene_source "ena"; gene_biotype "protein_coding"; transcript_source "ena"; transcript_biotype "protein_coding";
1	ena	transcript	130356	132334	.	-	.	gene_id "CNAG_00043"; transcript_id "AFR92181"; gene_source "ena"; gene_biotype "protein_coding"; transcript_source "ena"; transcript_biotype "protein_coding";
1	ena	exon	131209	132334	.	-	.	gene_id "CNAG_00043"; transcript_id "AFR92181"; exon_number "1"; gene_source "ena"; gene_biotype "protein_coding"; transcript_source "ena"; transcript_biotype "protein_coding"; exon_id "AFR92181-1";
1	ena	CDS	131209	132334	.	-	0	gene_id "CNAG_00043"; transcript_id "AFR92181"; exon_number "1"; gene_source "ena"; gene_biotype "protein_coding"; transcript_source "ena"; transcript_biotype "protein_coding"; protein_id "AFR92181"; protein_version "1";
1	ena	start_codon	132332	132334	.	-	0	gene_id "CNAG_00043"; transcript_id "AFR92181"; exon_number "1"; gene_source "ena"; gene_biotype "protein_coding"; transcript_source "ena"; transcript_biotype "protein_coding";
1	ena	exon	130356	131137	.	-	.	gene_id "CNAG_00043"; transcript_id "AFR92181"; exon_number "2"; gene_source "ena"; gene_biotype "protein_coding"; transcript_source "ena"; transcript_biotype "protein_coding"; exon_id "AFR92181-2";
1	ena	CDS	130359	131137	.	-	2	gene_id "CNAG_00043"; transcript_id "AFR92181"; exon_number "2"; gene_source "ena"; gene_biotype "protein_coding"; transcript_source "ena"; transcript_biotype "protein_coding"; protein_id "AFR92181"; protein_version "1";
1	ena	stop_codon	130356	130358	.	-	0	gene_id "CNAG_00043"; transcript_id "AFR92181"; exon_number "2"; gene_source "ena"; gene_biotype "protein_coding"; transcript_source "ena"; transcript_biotype "protein_coding";
1	ena	gene	132488	136450	.	+	.	gene_id "CNAG_00044"; gene_source "ena"; gene_biotype "protein_coding";
1	ena	transcript	132488	136450	.	+	.	gene_id "CNAG_00044"; transcript_id "AFR92182"; gene_source "ena"; gene_biotype "protein_coding"; transcript_source "ena"; transcript_biotype "protein_coding";
1	ena	exon	132488	132634	.	+	.	gene_id "CNAG_00044"; transcript_id "AFR92182"; exon_number "1"; gene_source "ena"; gene_biotype "protein_coding"; transcript_source "ena"; transcript_biotype "protein_coding"; exon_id "AFR92182-1";
1	ena	CDS	132596	132634	.	+	0	gene_id "CNAG_00044"; transcript_id "AFR92182"; exon_number "1"; gene_source "ena"; gene_biotype "protein_coding"; transcript_source "ena"; transcript_biotype "protein_coding"; protein_id "AFR92182"; protein_version "1";
1	ena	start_codon	132596	132598	.	+	0	gene_id "CNAG_00044"; transcript_id "AFR92182"; exon_number "1"; gene_source "ena"; gene_biotype "protein_coding"; transcript_source "ena"; transcript_biotype "protein_coding";
1	ena	exon	132691	133604	.	+	.	gene_id "CNAG_00044"; transcript_id "AFR92182"; exon_number "2"; gene_source "ena"; gene_biotype "protein_coding"; transcript_source "ena"; transcript_biotype "protein_coding"; exon_id "AFR92182-2";
1	ena	CDS	132691	133604	.	+	0	gene_id "CNAG_00044"; transcript_id "AFR92182"; exon_number "2"; gene_source "ena"; gene_biotype "protein_coding"; transcript_source "ena"; transcript_biotype "protein_coding"; protein_id "AFR92182"; protein_version "1";
1	ena	exon	133659	134608	.	+	.	gene_id "CNAG_00044"; transcript_id "AFR92182"; exon_number "3"; gene_source "ena"; gene_biotype "protein_coding"; transcript_source "ena"; transcript_biotype "protein_coding"; exon_id "AFR92182-3";
1	ena	CDS	133659	134608	.	+	1	gene_id "CNAG_00044"; transcript_id "AFR92182"; exon_number "3"; gene_source "ena"; gene_biotype "protein_coding"; transcript_source "ena"; transcript_biotype "protein_coding"; protein_id "AFR92182"; protein_version "1";
1	ena	exon	134668	134789	.	+	.	gene_id "CNAG_00044"; transcript_id "AFR92182"; exon_number "4"; gene_source "ena"; gene_biotype "protein_coding"; transcript_source "ena"; transcript_biotype "protein_coding"; exon_id "AFR92182-4";
1	ena	CDS	134668	134789	.	+	2	gene_id "CNAG_00044"; transcript_id "AFR92182"; exon_number "4"; gene_source "ena"; gene_biotype "protein_coding"; transcript_source "ena"; transcript_biotype "protein_coding"; protein_id "AFR92182"; protein_version "1";
1	ena	exon	134843	135785	.	+	.	gene_id "CNAG_00044"; transcript_id "AFR92182"; exon_number "5"; gene_source "ena"; gene_biotype "protein_coding"; transcript_source "ena"; transcript_biotype "protein_coding"; exon_id "AFR92182-5";
1	ena	CDS	134843	135785	.	+	0	gene_id "CNAG_00044"; transcript_id "AFR92182"; exon_number "5"; gene_source "ena"; gene_biotype "protein_coding"; transcript_source "ena"; transcript_biotype "protein_coding"; protein_id "AFR92182"; protein_version "1";
1	ena	exon	135845	135982	.	+	.	gene_id "CNAG_00044"; transcript_id "AFR92182"; exon_number "6"; gene_source "ena"; gene_biotype "protein_coding"; transcript_source "ena"; transcript_biotype "protein_coding"; exon_id "AFR92182-6";
1	ena	CDS	135845	135982	.	+	2	gene_id "CNAG_00044"; transcript_id "AFR92182"; exon_number "6"; gene_source "ena"; gene_biotype "protein_coding"; transcript_source "ena"; transcript_biotype "protein_coding"; protein_id "AFR92182"; protein_version "1";
1	ena	exon	136041	136450	.	+	.	gene_id "CNAG_00044"; transcript_id "AFR92182"; exon_number "7"; gene_source "ena"; gene_biotype "protein_coding"; transcript_source "ena"; transcript_biotype "protein_coding"; exon_id "AFR92182-7";
1	ena	CDS	136041	136279	.	+	2	gene_id "CNAG_00044"; transcript_id "AFR92182"; exon_number "7"; gene_source "ena"; gene_biotype "protein_coding"; transcript_source "ena"; transcript_biotype "protein_coding"; protein_id "AFR92182"; protein_version "1";
1	ena	stop_codon	136280	136282	.	+	0	gene_id "CNAG_00044"; transcript_id "AFR92182"; exon_number "7"; gene_source "ena"; gene_biotype "protein_coding"; transcript_source "ena"; transcript_biotype "protein_coding";
1	ena	five_prime_utr	132488	132595	.	+	.	gene_id "CNAG_00044"; transcript_id "AFR92182"; gene_source "ena"; gene_biotype "protein_coding"; transcript_source "ena"; transcript_biotype "protein_coding";
1	ena	three_prime_utr	136283	136450	.	+	.	gene_id "CNAG_00044"; transcript_id "AFR92182"; gene_source "ena"; gene_biotype "protein_coding"; transcript_source "ena"; transcript_biotype "protein_coding";
1	ena	gene	136325	137902	.	-	.	gene_id "CNAG_00045"; gene_source "ena"; gene_biotype "protein_coding";
1	ena	transcript	136325	137902	.	-	.	gene_id "CNAG_00045"; transcript_id "AFR92183"; gene_source "ena"; gene_biotype "protein_coding"; transcript_source "ena"; transcript_biotype "protein_coding";
1	ena	exon	137414	137902	.	-	.	gene_id "CNAG_00045"; transcript_id "AFR92183"; exon_number "1"; gene_source "ena"; gene_biotype "protein_coding"; transcript_source "ena"; transcript_biotype "protein_coding"; exon_id "AFR92183-1";
1	ena	CDS	137414	137824	.	-	0	gene_id "CNAG_00045"; transcript_id "AFR92183"; exon_number "1"; gene_source "ena"; gene_biotype "protein_coding"; transcript_source "ena"; transcript_biotype "protein_coding"; protein_id "AFR92183"; protein_version "1";
1	ena	start_codon	137822	137824	.	-	0	gene_id "CNAG_00045"; transcript_id "AFR92183"; exon_number "1"; gene_source "ena"; gene_biotype "protein_coding"; transcript_source "ena"; transcript_biotype "protein_coding";
1	ena	exon	137185	137336	.	-	.	gene_id "CNAG_00045"; transcript_id "AFR92183"; exon_number "2"; gene_source "ena"; gene_biotype "protein_coding"; transcript_source "ena"; transcript_biotype "protein_coding"; exon_id "AFR92183-2";
1	ena	CDS	137185	137336	.	-	0	gene_id "CNAG_00045"; transcript_id "AFR92183"; exon_number "2"; gene_source "ena"; gene_biotype "protein_coding"; transcript_source "ena"; transcript_biotype "protein_coding"; protein_id "AFR92183"; protein_version "1";
1	ena	exon	136325	137126	.	-	.	gene_id "CNAG_00045"; transcript_id "AFR92183"; exon_number "3"; gene_source "ena"; gene_biotype "protein_coding"; transcript_source "ena"; transcript_biotype "protein_coding"; exon_id "AFR92183-3";
1	ena	CDS	136433	137126	.	-	1	gene_id "CNAG_00045"; transcript_id "AFR92183"; exon_number "3"; gene_source "ena"; gene_biotype "protein_coding"; transcript_source "ena"; transcript_biotype "protein_coding"; protein_id "AFR92183"; protein_version "1";
1	ena	stop_codon	136430	136432	.	-	0	gene_id "CNAG_00045"; transcript_id "AFR92183"; exon_number "3"; gene_source "ena"; gene_biotype "protein_coding"; transcript_source "ena"; transcript_biotype "protein_coding";
1	ena	five_prime_utr	137825	137902	.	-	.	gene_id "CNAG_00045"; transcript_id "AFR92183"; gene_source "ena"; gene_biotype "protein_coding"; transcript_source "ena"; transcript_biotype "protein_coding";
1	ena	three_prime_utr	136325	136429	.	-	.	gene_id "CNAG_00045"; transcript_id "AFR92183"; gene_source "ena"; gene_biotype "protein_coding"; transcript_source "ena"; transcript_biotype "protein_coding";
1	ena	gene	138051	139691	.	+	.	gene_id "CNAG_00046"; gene_source "ena"; gene_biotype "protein_coding";
1	ena	transcript	138051	139691	.	+	.	gene_id "CNAG_00046"; transcript_id "AFR92184"; gene_source "ena"; gene_biotype "protein_coding"; transcript_source "ena"; transcript_biotype "protein_coding";
1	ena	exon	138051	138125	.	+	.	gene_id "CNAG_00046"; transcript_id "AFR92184"; exon_number "1"; gene_source "ena"; gene_biotype "protein_coding"; transcript_source "ena"; transcript_biotype "protein_coding"; exon_id "AFR92184-1";
1	ena	CDS	138102	138125	.	+	0	gene_id "CNAG_00046"; transcript_id "AFR92184"; exon_number "1"; gene_source "ena"; gene_biotype "protein_coding"; transcript_source "ena"; transcript_biotype "protein_coding"; protein_id "AFR92184"; protein_version "1";
1	ena	start_codon	138102	138104	.	+	0	gene_id "CNAG_00046"; transcript_id "AFR92184"; exon_number "1"; gene_source "ena"; gene_biotype "protein_coding"; transcript_source "ena"; transcript_biotype "protein_coding";
1	ena	exon	138185	138210	.	+	.	gene_id "CNAG_00046"; transcript_id "AFR92184"; exon_number "2"; gene_source "ena"; gene_biotype "protein_coding"; transcript_source "ena"; transcript_biotype "protein_coding"; exon_id "AFR92184-2";
1	ena	CDS	138185	138210	.	+	0	gene_id "CNAG_00046"; transcript_id "AFR92184"; exon_number "2"; gene_source "ena"; gene_biotype "protein_coding"; transcript_source "ena"; transcript_biotype "protein_coding"; protein_id "AFR92184"; protein_version "1";
1	ena	exon	138272	138400	.	+	.	gene_id "CNAG_00046"; transcript_id "AFR92184"; exon_number "3"; gene_source "ena"; gene_biotype "protein_coding"; transcript_source "ena"; transcript_biotype "protein_coding"; exon_id "AFR92184-3";
1	ena	CDS	138272	138400	.	+	1	gene_id "CNAG_00046"; transcript_id "AFR92184"; exon_number "3"; gene_source "ena"; gene_biotype "protein_coding"; transcript_source "ena"; transcript_biotype "protein_coding"; protein_id "AFR92184"; protein_version "1";
1	ena	exon	138483	138583	.	+	.	gene_id "CNAG_00046"; transcript_id "AFR92184"; exon_number "4"; gene_source "ena"; gene_biotype "protein_coding"; transcript_source "ena"; transcript_biotype "protein_coding"; exon_id "AFR92184-4";
1	ena	CDS	138483	138583	.	+	1	gene_id "CNAG_00046"; transcript_id "AFR92184"; exon_number "4"; gene_source "ena"; gene_biotype "protein_coding"; transcript_source "ena"; transcript_biotype "protein_coding"; protein_id "AFR92184"; protein_version "1";
1	ena	exon	138639	139247	.	+	.	gene_id "CNAG_00046"; transcript_id "AFR92184"; exon_number "5"; gene_source "ena"; gene_biotype "protein_coding"; transcript_source "ena"; transcript_biotype "protein_coding"; exon_id "AFR92184-5";
1	ena	CDS	138639	139247	.	+	2	gene_id "CNAG_00046"; transcript_id "AFR92184"; exon_number "5"; gene_source "ena"; gene_biotype "protein_coding"; transcript_source "ena"; transcript_biotype "protein_coding"; protein_id "AFR92184"; protein_version "1";
1	ena	exon	139308	139691	.	+	.	gene_id "CNAG_00046"; transcript_id "AFR92184"; exon_number "6"; gene_source "ena"; gene_biotype "protein_coding"; transcript_source "ena"; transcript_biotype "protein_coding"; exon_id "AFR92184-6";
1	ena	CDS	139308	139471	.	+	2	gene_id "CNAG_00046"; transcript_id "AFR92184"; exon_number "6"; gene_source "ena"; gene_biotype "protein_coding"; transcript_source "ena"; transcript_biotype "protein_coding"; protein_id "AFR92184"; protein_version "1";
1	ena	five_prime_utr	138051	138101	.	+	.	gene_id "CNAG_00046"; transcript_id "AFR92184"; gene_source "ena"; gene_biotype "protein_coding"; transcript_source "ena"; transcript_biotype "protein_coding";
1	ena	three_prime_utr	139472	139691	.	+	.	gene_id "CNAG_00046"; transcript_id "AFR92184"; gene_source "ena"; gene_biotype "protein_coding"; transcript_source "ena"; transcript_biotype "protein_coding";
1	ena	gene	139535	141970	.	-	.	gene_id "CNAG_00047"; gene_source "ena"; gene_biotype "protein_coding";
1	ena	transcript	139535	141970	.	-	.	gene_id "CNAG_00047"; transcript_id "AFR92185"; gene_source "ena"; gene_biotype "protein_coding"; transcript_source "ena"; transcript_biotype "protein_coding";
1	ena	exon	141715	141970	.	-	.	gene_id "CNAG_00047"; transcript_id "AFR92185"; exon_number "1"; gene_source "ena"; gene_biotype "protein_coding"; transcript_source "ena"; transcript_biotype "protein_coding"; exon_id "AFR92185-1";
1	ena	CDS	141715	141787	.	-	0	gene_id "CNAG_00047"; transcript_id "AFR92185"; exon_number "1"; gene_source "ena"; gene_biotype "protein_coding"; transcript_source "ena"; transcript_biotype "protein_coding"; protein_id "AFR92185"; protein_version "1";
1	ena	start_codon	141785	141787	.	-	0	gene_id "CNAG_00047"; transcript_id "AFR92185"; exon_number "1"; gene_source "ena"; gene_biotype "protein_coding"; transcript_source "ena"; transcript_biotype "protein_coding";
1	ena	exon	141463	141656	.	-	.	gene_id "CNAG_00047"; transcript_id "AFR92185"; exon_number "2"; gene_source "ena"; gene_biotype "protein_coding"; transcript_source "ena"; transcript_biotype "protein_coding"; exon_id "AFR92185-2";
1	ena	CDS	141463	141656	.	-	2	gene_id "CNAG_00047"; transcript_id "AFR92185"; exon_number "2"; gene_source "ena"; gene_biotype "protein_coding"; transcript_source "ena"; transcript_biotype "protein_coding"; protein_id "AFR92185"; protein_version "1";
1	ena	exon	141173	141243	.	-	.	gene_id "CNAG_00047"; transcript_id "AFR92185"; exon_number "3"; gene_source "ena"; gene_biotype "protein_coding"; transcript_source "ena"; transcript_biotype "protein_coding"; exon_id "AFR92185-3";
1	ena	CDS	141173	141243	.	-	0	gene_id "CNAG_00047"; transcript_id "AFR92185"; exon_number "3"; gene_source "ena"; gene_biotype "protein_coding"; transcript_source "ena"; transcript_biotype "protein_coding"; protein_id "AFR92185"; protein_version "1";
1	ena	exon	140685	141112	.	-	.	gene_id "CNAG_00047"; transcript_id "AFR92185"; exon_number "4"; gene_source "ena"; gene_biotype "protein_coding"; transcript_source "ena"; transcript_biotype "protein_coding"; exon_id "AFR92185-4";
1	ena	CDS	140685	141112	.	-	1	gene_id "CNAG_00047"; transcript_id "AFR92185"; exon_number "4"; gene_source "ena"; gene_biotype "protein_coding"; transcript_source "ena"; transcript_biotype "protein_coding"; protein_id "AFR92185"; protein_version "1";
1	ena	exon	140510	140602	.	-	.	gene_id "CNAG_00047"; transcript_id "AFR92185"; exon_number "5"; gene_source "ena"; gene_biotype "protein_coding"; transcript_source "ena"; transcript_biotype "protein_coding"; exon_id "AFR92185-5";
1	ena	CDS	140510	140602	.	-	2	gene_id "CNAG_00047"; transcript_id "AFR92185"; exon_number "5"; gene_source "ena"; gene_biotype "protein_coding"; transcript_source "ena"; transcript_biotype "protein_coding"; protein_id "AFR92185"; protein_version "1";
1	ena	exon	140164	140455	.	-	.	gene_id "CNAG_00047"; transcript_id "AFR92185"; exon_number "6"; gene_source "ena"; gene_biotype "protein_coding"; transcript_source "ena"; transcript_biotype "protein_coding"; exon_id "AFR92185-6";
1	ena	CDS	140164	140455	.	-	2	gene_id "CNAG_00047"; transcript_id "AFR92185"; exon_number "6"; gene_source "ena"; gene_biotype "protein_coding"; transcript_source "ena"; transcript_biotype "protein_coding"; protein_id "AFR92185"; protein_version "1";
1	ena	exon	140012	140095	.	-	.	gene_id "CNAG_00047"; transcript_id "AFR92185"; exon_number "7"; gene_source "ena"; gene_biotype "protein_coding"; transcript_source "ena"; transcript_biotype "protein_coding"; exon_id "AFR92185-7";
1	ena	CDS	140012	140095	.	-	1	gene_id "CNAG_00047"; transcript_id "AFR92185"; exon_number "7"; gene_source "ena"; gene_biotype "protein_coding"; transcript_source "ena"; transcript_biotype "protein_coding"; protein_id "AFR92185"; protein_version "1";
1	ena	exon	139925	139949	.	-	.	gene_id "CNAG_00047"; transcript_id "AFR92185"; exon_number "8"; gene_source "ena"; gene_biotype "protein_coding"; transcript_source "ena"; transcript_biotype "protein_coding"; exon_id "AFR92185-8";
1	ena	CDS	139925	139949	.	-	1	gene_id "CNAG_00047"; transcript_id "AFR92185"; exon_number "8"; gene_source "ena"; gene_biotype "protein_coding"; transcript_source "ena"; transcript_biotype "protein_coding"; protein_id "AFR92185"; protein_version "1";
1	ena	exon	139778	139869	.	-	.	gene_id "CNAG_00047"; transcript_id "AFR92185"; exon_number "9"; gene_source "ena"; gene_biotype "protein_coding"; transcript_source "ena"; transcript_biotype "protein_coding"; exon_id "AFR92185-9";
1	ena	CDS	139778	139869	.	-	0	gene_id "CNAG_00047"; transcript_id "AFR92185"; exon_number "9"; gene_source "ena"; gene_biotype "protein_coding"; transcript_source "ena"; transcript_biotype "protein_coding"; protein_id "AFR92185"; protein_version "1";
1	ena	exon	139535	139722	.	-	.	gene_id "CNAG_00047"; transcript_id "AFR92185"; exon_number "10"; gene_source "ena"; gene_biotype "protein_coding"; transcript_source "ena"; transcript_biotype "protein_coding"; exon_id "AFR92185-10";
1	ena	CDS	139704	139722	.	-	1	gene_id "CNAG_00047"; transcript_id "AFR92185"; exon_number "10"; gene_source "ena"; gene_biotype "protein_coding"; transcript_source "ena"; transcript_biotype "protein_coding"; protein_id "AFR92185"; protein_version "1";
1	ena	five_prime_utr	141788	141970	.	-	.	gene_id "CNAG_00047"; transcript_id "AFR92185"; gene_source "ena"; gene_biotype "protein_coding"; transcript_source "ena"; transcript_biotype "protein_coding";
1	ena	three_prime_utr	139535	139703	.	-	.	gene_id "CNAG_00047"; transcript_id "AFR92185"; gene_source "ena"; gene_biotype "protein_coding"; transcript_source "ena"; transcript_biotype "protein_coding";
1	ena	gene	142132	144707	.	-	.	gene_id "CNAG_00048"; gene_source "ena"; gene_biotype "protein_coding";
1	ena	transcript	142132	144707	.	-	.	gene_id "CNAG_00048"; transcript_id "AFR92186"; gene_source "ena"; gene_biotype "protein_coding"; transcript_source "ena"; transcript_biotype "protein_coding";
1	ena	exon	144112	144707	.	-	.	gene_id "CNAG_00048"; transcript_id "AFR92186"; exon_number "1"; gene_source "ena"; gene_biotype "protein_coding"; transcript_source "ena"; transcript_biotype "protein_coding"; exon_id "AFR92186-1";
1	ena	CDS	144112	144363	.	-	0	gene_id "CNAG_00048"; transcript_id "AFR92186"; exon_number "1"; gene_source "ena"; gene_biotype "protein_coding"; transcript_source "ena"; transcript_biotype "protein_coding"; protein_id "AFR92186"; protein_version "1";
1	ena	start_codon	144361	144363	.	-	0	gene_id "CNAG_00048"; transcript_id "AFR92186"; exon_number "1"; gene_source "ena"; gene_biotype "protein_coding"; transcript_source "ena"; transcript_biotype "protein_coding";
1	ena	exon	143969	144048	.	-	.	gene_id "CNAG_00048"; transcript_id "AFR92186"; exon_number "2"; gene_source "ena"; gene_biotype "protein_coding"; transcript_source "ena"; transcript_biotype "protein_coding"; exon_id "AFR92186-2";
1	ena	CDS	143969	144048	.	-	0	gene_id "CNAG_00048"; transcript_id "AFR92186"; exon_number "2"; gene_source "ena"; gene_biotype "protein_coding"; transcript_source "ena"; transcript_biotype "protein_coding"; protein_id "AFR92186"; protein_version "1";
1	ena	exon	143629	143906	.	-	.	gene_id "CNAG_00048"; transcript_id "AFR92186"; exon_number "3"; gene_source "ena"; gene_biotype "protein_coding"; transcript_source "ena"; transcript_biotype "protein_coding"; exon_id "AFR92186-3";
1	ena	CDS	143629	143906	.	-	1	gene_id "CNAG_00048"; transcript_id "AFR92186"; exon_number "3"; gene_source "ena"; gene_biotype "protein_coding"; transcript_source "ena"; transcript_biotype "protein_coding"; protein_id "AFR92186"; protein_version "1";
1	ena	exon	143259	143571	.	-	.	gene_id "CNAG_00048"; transcript_id "AFR92186"; exon_number "4"; gene_source "ena"; gene_biotype "protein_coding"; transcript_source "ena"; transcript_biotype "protein_coding"; exon_id "AFR92186-4";
1	ena	CDS	143259	143571	.	-	2	gene_id "CNAG_00048"; transcript_id "AFR92186"; exon_number "4"; gene_source "ena"; gene_biotype "protein_coding"; transcript_source "ena"; transcript_biotype "protein_coding"; protein_id "AFR92186"; protein_version "1";
1	ena	exon	143137	143209	.	-	.	gene_id "CNAG_00048"; transcript_id "AFR92186"; exon_number "5"; gene_source "ena"; gene_biotype "protein_coding"; transcript_source "ena"; transcript_biotype "protein_coding"; exon_id "AFR92186-5";
1	ena	CDS	143137	143209	.	-	1	gene_id "CNAG_00048"; transcript_id "AFR92186"; exon_number "5"; gene_source "ena"; gene_biotype "protein_coding"; transcript_source "ena"; transcript_biotype "protein_coding"; protein_id "AFR92186"; protein_version "1";
1	ena	exon	142694	143077	.	-	.	gene_id "CNAG_00048"; transcript_id "AFR92186"; exon_number "6"; gene_source "ena"; gene_biotype "protein_coding"; transcript_source "ena"; transcript_biotype "protein_coding"; exon_id "AFR92186-6";
1	ena	CDS	142694	143077	.	-	0	gene_id "CNAG_00048"; transcript_id "AFR92186"; exon_number "6"; gene_source "ena"; gene_biotype "protein_coding"; transcript_source "ena"; transcript_biotype "protein_coding"; protein_id "AFR92186"; protein_version "1";
1	ena	exon	142521	142635	.	-	.	gene_id "CNAG_00048"; transcript_id "AFR92186"; exon_number "7"; gene_source "ena"; gene_biotype "protein_coding"; transcript_source "ena"; transcript_biotype "protein_coding"; exon_id "AFR92186-7";
1	ena	CDS	142521	142635	.	-	0	gene_id "CNAG_00048"; transcript_id "AFR92186"; exon_number "7"; gene_source "ena"; gene_biotype "protein_coding"; transcript_source "ena"; transcript_biotype "protein_coding"; protein_id "AFR92186"; protein_version "1";
1	ena	exon	142132	142458	.	-	.	gene_id "CNAG_00048"; transcript_id "AFR92186"; exon_number "8"; gene_source "ena"; gene_biotype "protein_coding"; transcript_source "ena"; transcript_biotype "protein_coding"; exon_id "AFR92186-8";
1	ena	CDS	142313	142458	.	-	2	gene_id "CNAG_00048"; transcript_id "AFR92186"; exon_number "8"; gene_source "ena"; gene_biotype "protein_coding"; transcript_source "ena"; transcript_biotype "protein_coding"; protein_id "AFR92186"; protein_version "1";
1	ena	five_prime_utr	144364	144707	.	-	.	gene_id "CNAG_00048"; transcript_id "AFR92186"; gene_source "ena"; gene_biotype "protein_coding"; transcript_source "ena"; transcript_biotype "protein_coding";
1	ena	three_prime_utr	142132	142312	.	-	.	gene_id "CNAG_00048"; transcript_id "AFR92186"; gene_source "ena"; gene_biotype "protein_coding"; transcript_source "ena"; transcript_biotype "protein_coding";
1	ena	gene	142217	143061	.	+	.	gene_id "CNAG_12007"; gene_name "CNAG_12007"; gene_source "ena"; gene_biotype "ncRNA";
1	ena	transcript	142217	143061	.	+	.	gene_id "CNAG_12007"; transcript_id "CNAG_12007-1"; gene_name "CNAG_12007"; gene_source "ena"; gene_biotype "ncRNA"; transcript_name "CNAG_12007"; transcript_source "ena"; transcript_biotype "ncRNA";
1	ena	exon	142217	143061	.	+	.	gene_id "CNAG_12007"; transcript_id "CNAG_12007-1"; exon_number "1"; gene_name "CNAG_12007"; gene_source "ena"; gene_biotype "ncRNA"; transcript_name "CNAG_12007"; transcript_source "ena"; transcript_biotype "ncRNA"; exon_id "CNAG_12007-1-1";
1	ena	gene	144928	147198	.	+	.	gene_id "CNAG_00049"; gene_source "ena"; gene_biotype "protein_coding";
1	ena	transcript	144928	147198	.	+	.	gene_id "CNAG_00049"; transcript_id "AFR92187"; gene_source "ena"; gene_biotype "protein_coding"; transcript_source "ena"; transcript_biotype "protein_coding";
1	ena	exon	144928	145579	.	+	.	gene_id "CNAG_00049"; transcript_id "AFR92187"; exon_number "1"; gene_source "ena"; gene_biotype "protein_coding"; transcript_source "ena"; transcript_biotype "protein_coding"; exon_id "AFR92187-1";
1	ena	CDS	145392	145579	.	+	0	gene_id "CNAG_00049"; transcript_id "AFR92187"; exon_number "1"; gene_source "ena"; gene_biotype "protein_coding"; transcript_source "ena"; transcript_biotype "protein_coding"; protein_id "AFR92187"; protein_version "1";
1	ena	start_codon	145392	145394	.	+	0	gene_id "CNAG_00049"; transcript_id "AFR92187"; exon_number "1"; gene_source "ena"; gene_biotype "protein_coding"; transcript_source "ena"; transcript_biotype "protein_coding";
1	ena	exon	145653	145712	.	+	.	gene_id "CNAG_00049"; transcript_id "AFR92187"; exon_number "2"; gene_source "ena"; gene_biotype "protein_coding"; transcript_source "ena"; transcript_biotype "protein_coding"; exon_id "AFR92187-2";
1	ena	CDS	145653	145712	.	+	1	gene_id "CNAG_00049"; transcript_id "AFR92187"; exon_number "2"; gene_source "ena"; gene_biotype "protein_coding"; transcript_source "ena"; transcript_biotype "protein_coding"; protein_id "AFR92187"; protein_version "1";
1	ena	exon	145773	145912	.	+	.	gene_id "CNAG_00049"; transcript_id "AFR92187"; exon_number "3"; gene_source "ena"; gene_biotype "protein_coding"; transcript_source "ena"; transcript_biotype "protein_coding"; exon_id "AFR92187-3";
1	ena	CDS	145773	145912	.	+	1	gene_id "CNAG_00049"; transcript_id "AFR92187"; exon_number "3"; gene_source "ena"; gene_biotype "protein_coding"; transcript_source "ena"; transcript_biotype "protein_coding"; protein_id "AFR92187"; protein_version "1";
1	ena	exon	145976	146251	.	+	.	gene_id "CNAG_00049"; transcript_id "AFR92187"; exon_number "4"; gene_source "ena"; gene_biotype "protein_coding"; transcript_source "ena"; transcript_biotype "protein_coding"; exon_id "AFR92187-4";
1	ena	CDS	145976	146251	.	+	2	gene_id "CNAG_00049"; transcript_id "AFR92187"; exon_number "4"; gene_source "ena"; gene_biotype "protein_coding"; transcript_source "ena"; transcript_biotype "protein_coding"; protein_id "AFR92187"; protein_version "1";
1	ena	exon	146315	146475	.	+	.	gene_id "CNAG_00049"; transcript_id "AFR92187"; exon_number "5"; gene_source "ena"; gene_biotype "protein_coding"; transcript_source "ena"; transcript_biotype "protein_coding"; exon_id "AFR92187-5";
1	ena	CDS	146315	146475	.	+	2	gene_id "CNAG_00049"; transcript_id "AFR92187"; exon_number "5"; gene_source "ena"; gene_biotype "protein_coding"; transcript_source "ena"; transcript_biotype "protein_coding"; protein_id "AFR92187"; protein_version "1";
1	ena	exon	146560	147198	.	+	.	gene_id "CNAG_00049"; transcript_id "AFR92187"; exon_number "6"; gene_source "ena"; gene_biotype "protein_coding"; transcript_source "ena"; transcript_biotype "protein_coding"; exon_id "AFR92187-6";
1	ena	CDS	146560	146709	.	+	0	gene_id "CNAG_00049"; transcript_id "AFR92187"; exon_number "6"; gene_source "ena"; gene_biotype "protein_coding"; transcript_source "ena"; transcript_biotype "protein_coding"; protein_id "AFR92187"; protein_version "1";
1	ena	stop_codon	146710	146712	.	+	0	gene_id "CNAG_00049"; transcript_id "AFR92187"; exon_number "6"; gene_source "ena"; gene_biotype "protein_coding"; transcript_source "ena"; transcript_biotype "protein_coding";
1	ena	five_prime_utr	144928	145391	.	+	.	gene_id "CNAG_00049"; transcript_id "AFR92187"; gene_source "ena"; gene_biotype "protein_coding"; transcript_source "ena"; transcript_biotype "protein_coding";
1	ena	three_prime_utr	146713	147198	.	+	.	gene_id "CNAG_00049"; transcript_id "AFR92187"; gene_source "ena"; gene_biotype "protein_coding"; transcript_source "ena"; transcript_biotype "protein_coding";
1	ena	gene	145146	146366	.	-	.	gene_id "CNAG_12008"; gene_name "CNAG_12008"; gene_source "ena"; gene_biotype "ncRNA";
1	ena	transcript	145146	146366	.	-	.	gene_id "CNAG_12008"; transcript_id "CNAG_12008-1"; gene_name "CNAG_12008"; gene_source "ena"; gene_biotype "ncRNA"; transcript_name "CNAG_12008"; transcript_source "ena"; transcript_biotype "ncRNA";
1	ena	exon	146295	146366	.	-	.	gene_id "CNAG_12008"; transcript_id "CNAG_12008-1"; exon_number "1"; gene_name "CNAG_12008"; gene_source "ena"; gene_biotype "ncRNA"; transcript_name "CNAG_12008"; transcript_source "ena"; transcript_biotype "ncRNA"; exon_id "CNAG_12008-1-1";
1	ena	exon	145760	146230	.	-	.	gene_id "CNAG_12008"; transcript_id "CNAG_12008-1"; exon_number "2"; gene_name "CNAG_12008"; gene_source "ena"; gene_biotype "ncRNA"; transcript_name "CNAG_12008"; transcript_source "ena"; transcript_biotype "ncRNA"; exon_id "CNAG_12008-1-2";
1	ena	exon	145567	145690	.	-	.	gene_id "CNAG_12008"; transcript_id "CNAG_12008-1"; exon_number "3"; gene_name "CNAG_12008"; gene_source "ena"; gene_biotype "ncRNA"; transcript_name "CNAG_12008"; transcript_source "ena"; transcript_biotype "ncRNA"; exon_id "CNAG_12008-1-3";
1	ena	exon	145146	145464	.	-	.	gene_id "CNAG_12008"; transcript_id "CNAG_12008-1"; exon_number "4"; gene_name "CNAG_12008"; gene_source "ena"; gene_biotype "ncRNA"; transcript_name "CNAG_12008"; transcript_source "ena"; transcript_biotype "ncRNA"; exon_id "CNAG_12008-1-4";
1	ena	gene	146729	148175	.	-	.	gene_id "CNAG_00050"; gene_source "ena"; gene_biotype "protein_coding";
1	ena	transcript	146729	148175	.	-	.	gene_id "CNAG_00050"; transcript_id "AFR92188"; gene_source "ena"; gene_biotype "protein_coding"; transcript_source "ena"; transcript_biotype "protein_coding";
1	ena	exon	147855	148175	.	-	.	gene_id "CNAG_00050"; transcript_id "AFR92188"; exon_number "1"; gene_source "ena"; gene_biotype "protein_coding"; transcript_source "ena"; transcript_biotype "protein_coding"; exon_id "AFR92188-1";
1	ena	CDS	147855	147999	.	-	0	gene_id "CNAG_00050"; transcript_id "AFR92188"; exon_number "1"; gene_source "ena"; gene_biotype "protein_coding"; transcript_source "ena"; transcript_biotype "protein_coding"; protein_id "AFR92188"; protein_version "1";
1	ena	start_codon	147997	147999	.	-	0	gene_id "CNAG_00050"; transcript_id "AFR92188"; exon_number "1"; gene_source "ena"; gene_biotype "protein_coding"; transcript_source "ena"; transcript_biotype "protein_coding";
1	ena	exon	147689	147801	.	-	.	gene_id "CNAG_00050"; transcript_id "AFR92188"; exon_number "2"; gene_source "ena"; gene_biotype "protein_coding"; transcript_source "ena"; transcript_biotype "protein_coding"; exon_id "AFR92188-2";
1	ena	CDS	147689	147801	.	-	2	gene_id "CNAG_00050"; transcript_id "AFR92188"; exon_number "2"; gene_source "ena"; gene_biotype "protein_coding"; transcript_source "ena"; transcript_biotype "protein_coding"; protein_id "AFR92188"; protein_version "1";
1	ena	exon	147542	147633	.	-	.	gene_id "CNAG_00050"; transcript_id "AFR92188"; exon_number "3"; gene_source "ena"; gene_biotype "protein_coding"; transcript_source "ena"; transcript_biotype "protein_coding"; exon_id "AFR92188-3";
1	ena	CDS	147542	147633	.	-	0	gene_id "CNAG_00050"; transcript_id "AFR92188"; exon_number "3"; gene_source "ena"; gene_biotype "protein_coding"; transcript_source "ena"; transcript_biotype "protein_coding"; protein_id "AFR92188"; protein_version "1";
1	ena	exon	147408	147484	.	-	.	gene_id "CNAG_00050"; transcript_id "AFR92188"; exon_number "4"; gene_source "ena"; gene_biotype "protein_coding"; transcript_source "ena"; transcript_biotype "protein_coding"; exon_id "AFR92188-4";
1	ena	CDS	147408	147484	.	-	1	gene_id "CNAG_00050"; transcript_id "AFR92188"; exon_number "4"; gene_source "ena"; gene_biotype "protein_coding"; transcript_source "ena"; transcript_biotype "protein_coding"; protein_id "AFR92188"; protein_version "1";
1	ena	exon	147240	147358	.	-	.	gene_id "CNAG_00050"; transcript_id "AFR92188"; exon_number "5"; gene_source "ena"; gene_biotype "protein_coding"; transcript_source "ena"; transcript_biotype "protein_coding"; exon_id "AFR92188-5";
1	ena	CDS	147240	147358	.	-	2	gene_id "CNAG_00050"; transcript_id "AFR92188"; exon_number "5"; gene_source "ena"; gene_biotype "protein_coding"; transcript_source "ena"; transcript_biotype "protein_coding"; protein_id "AFR92188"; protein_version "1";
1	ena	exon	146729	147187	.	-	.	gene_id "CNAG_00050"; transcript_id "AFR92188"; exon_number "6"; gene_source "ena"; gene_biotype "protein_coding"; transcript_source "ena"; transcript_biotype "protein_coding"; exon_id "AFR92188-6";
1	ena	CDS	146831	147187	.	-	0	gene_id "CNAG_00050"; transcript_id "AFR92188"; exon_number "6"; gene_source "ena"; gene_biotype "protein_coding"; transcript_source "ena"; transcript_biotype "protein_coding"; protein_id "AFR92188"; protein_version "1";
1	ena	stop_codon	146828	146830	.	-	0	gene_id "CNAG_00050"; transcript_id "AFR92188"; exon_number "6"; gene_source "ena"; gene_biotype "protein_coding"; transcript_source "ena"; transcript_biotype "protein_coding";
1	ena	five_prime_utr	148000	148175	.	-	.	gene_id "CNAG_00050"; transcript_id "AFR92188"; gene_source "ena"; gene_biotype "protein_coding"; transcript_source "ena"; transcript_biotype "protein_coding";
1	ena	three_prime_utr	146729	146827	.	-	.	gene_id "CNAG_00050"; transcript_id "AFR92188"; gene_source "ena"; gene_biotype "protein_coding"; transcript_source "ena"; transcript_biotype "protein_coding";
1	ena	gene	148336	155003	.	-	.	gene_id "CNAG_00051"; gene_source "ena"; gene_biotype "protein_coding";
1	ena	transcript	148336	155003	.	-	.	gene_id "CNAG_00051"; transcript_id "AFR92189"; gene_source "ena"; gene_biotype "protein_coding"; transcript_source "ena"; transcript_biotype "protein_coding";
1	ena	exon	153554	155003	.	-	.	gene_id "CNAG_00051"; transcript_id "AFR92189"; exon_number "1"; gene_source "ena"; gene_biotype "protein_coding"; transcript_source "ena"; transcript_biotype "protein_coding"; exon_id "AFR92189-1";
1	ena	CDS	153554	153700	.	-	0	gene_id "CNAG_00051"; transcript_id "AFR92189"; exon_number "1"; gene_source "ena"; gene_biotype "protein_coding"; transcript_source "ena"; transcript_biotype "protein_coding"; protein_id "AFR92189"; protein_version "1";
1	ena	start_codon	153698	153700	.	-	0	gene_id "CNAG_00051"; transcript_id "AFR92189"; exon_number "1"; gene_source "ena"; gene_biotype "protein_coding"; transcript_source "ena"; transcript_biotype "protein_coding";
1	ena	exon	151650	153491	.	-	.	gene_id "CNAG_00051"; transcript_id "AFR92189"; exon_number "2"; gene_source "ena"; gene_biotype "protein_coding"; transcript_source "ena"; transcript_biotype "protein_coding"; exon_id "AGV15265-2";
1	ena	CDS	151650	153491	.	-	0	gene_id "CNAG_00051"; transcript_id "AFR92189"; exon_number "2"; gene_source "ena"; gene_biotype "protein_coding"; transcript_source "ena"; transcript_biotype "protein_coding"; protein_id "AFR92189"; protein_version "1";
1	ena	exon	149559	151601	.	-	.	gene_id "CNAG_00051"; transcript_id "AFR92189"; exon_number "3"; gene_source "ena"; gene_biotype "protein_coding"; transcript_source "ena"; transcript_biotype "protein_coding"; exon_id "AGV15265-3";
1	ena	CDS	149559	151601	.	-	0	gene_id "CNAG_00051"; transcript_id "AFR92189"; exon_number "3"; gene_source "ena"; gene_biotype "protein_coding"; transcript_source "ena"; transcript_biotype "protein_coding"; protein_id "AFR92189"; protein_version "1";
1	ena	exon	148336	149504	.	-	.	gene_id "CNAG_00051"; transcript_id "AFR92189"; exon_number "4"; gene_source "ena"; gene_biotype "protein_coding"; transcript_source "ena"; transcript_biotype "protein_coding"; exon_id "AFR92189-4";
1	ena	CDS	148617	149504	.	-	0	gene_id "CNAG_00051"; transcript_id "AFR92189"; exon_number "4"; gene_source "ena"; gene_biotype "protein_coding"; transcript_source "ena"; transcript_biotype "protein_coding"; protein_id "AFR92189"; protein_version "1";
1	ena	five_prime_utr	153701	155003	.	-	.	gene_id "CNAG_00051"; transcript_id "AFR92189"; gene_source "ena"; gene_biotype "protein_coding"; transcript_source "ena"; transcript_biotype "protein_coding";
1	ena	three_prime_utr	148336	148616	.	-	.	gene_id "CNAG_00051"; transcript_id "AFR92189"; gene_source "ena"; gene_biotype "protein_coding"; transcript_source "ena"; transcript_biotype "protein_coding";
1	ena	transcript	148617	153700	.	-	.	gene_id "CNAG_00051"; transcript_id "AGV15265"; gene_source "ena"; gene_biotype "protein_coding"; transcript_source "ena"; transcript_biotype "protein_coding";
1	ena	exon	153554	153700	.	-	.	gene_id "CNAG_00051"; transcript_id "AGV15265"; exon_number "1"; gene_source "ena"; gene_biotype "protein_coding"; transcript_source "ena"; transcript_biotype "protein_coding"; exon_id "AGV15265-1";
1	ena	CDS	153554	153700	.	-	0	gene_id "CNAG_00051"; transcript_id "AGV15265"; exon_number "1"; gene_source "ena"; gene_biotype "protein_coding"; transcript_source "ena"; transcript_biotype "protein_coding"; protein_id "AGV15265"; protein_version "1";
1	ena	start_codon	153698	153700	.	-	0	gene_id "CNAG_00051"; transcript_id "AGV15265"; exon_number "1"; gene_source "ena"; gene_biotype "protein_coding"; transcript_source "ena"; transcript_biotype "protein_coding";
1	ena	exon	151650	153491	.	-	.	gene_id "CNAG_00051"; transcript_id "AGV15265"; exon_number "2"; gene_source "ena"; gene_biotype "protein_coding"; transcript_source "ena"; transcript_biotype "protein_coding"; exon_id "AGV15265-2";
1	ena	CDS	151650	153491	.	-	0	gene_id "CNAG_00051"; transcript_id "AGV15265"; exon_number "2"; gene_source "ena"; gene_biotype "protein_coding"; transcript_source "ena"; transcript_biotype "protein_coding"; protein_id "AGV15265"; protein_version "1";
1	ena	exon	149559	151601	.	-	.	gene_id "CNAG_00051"; transcript_id "AGV15265"; exon_number "3"; gene_source "ena"; gene_biotype "protein_coding"; transcript_source "ena"; transcript_biotype "protein_coding"; exon_id "AGV15265-3";
1	ena	CDS	149559	151601	.	-	0	gene_id "CNAG_00051"; transcript_id "AGV15265"; exon_number "3"; gene_source "ena"; gene_biotype "protein_coding"; transcript_source "ena"; transcript_biotype "protein_coding"; protein_id "AGV15265"; protein_version "1";
1	ena	exon	148617	149504	.	-	.	gene_id "CNAG_00051"; transcript_id "AGV15265"; exon_number "4"; gene_source "ena"; gene_biotype "protein_coding"; transcript_source "ena"; transcript_biotype "protein_coding"; exon_id "AGV15265-4";
1	ena	CDS	148620	149504	.	-	0	gene_id "CNAG_00051"; transcript_id "AGV15265"; exon_number "4"; gene_source "ena"; gene_biotype "protein_coding"; transcript_source "ena"; transcript_biotype "protein_coding"; protein_id "AGV15265"; protein_version "1";
1	ena	stop_codon	148617	148619	.	-	0	gene_id "CNAG_00051"; transcript_id "AGV15265"; exon_number "4"; gene_source "ena"; gene_biotype "protein_coding"; transcript_source "ena"; transcript_biotype "protein_coding";
1	ena	gene	154270	154990	.	+	.	gene_id "CNAG_00052"; gene_source "ena"; gene_biotype "protein_coding";
1	ena	transcript	154270	154990	.	+	.	gene_id "CNAG_00052"; transcript_id "AFR92190"; gene_source "ena"; gene_biotype "protein_coding"; transcript_source "ena"; transcript_biotype "protein_coding";
1	ena	exon	154270	154427	.	+	.	gene_id "CNAG_00052"; transcript_id "AFR92190"; exon_number "1"; gene_source "ena"; gene_biotype "protein_coding"; transcript_source "ena"; transcript_biotype "protein_coding"; exon_id "AFR92190-1";
1	ena	CDS	154389	154427	.	+	0	gene_id "CNAG_00052"; transcript_id "AFR92190"; exon_number "1"; gene_source "ena"; gene_biotype "protein_coding"; transcript_source "ena"; transcript_biotype "protein_coding"; protein_id "AFR92190"; protein_version "1";
1	ena	start_codon	154389	154391	.	+	0	gene_id "CNAG_00052"; transcript_id "AFR92190"; exon_number "1"; gene_source "ena"; gene_biotype "protein_coding"; transcript_source "ena"; transcript_biotype "protein_coding";
1	ena	exon	154484	154625	.	+	.	gene_id "CNAG_00052"; transcript_id "AFR92190"; exon_number "2"; gene_source "ena"; gene_biotype "protein_coding"; transcript_source "ena"; transcript_biotype "protein_coding"; exon_id "AFR92190-2";
1	ena	CDS	154484	154625	.	+	0	gene_id "CNAG_00052"; transcript_id "AFR92190"; exon_number "2"; gene_source "ena"; gene_biotype "protein_coding"; transcript_source "ena"; transcript_biotype "protein_coding"; protein_id "AFR92190"; protein_version "1";
1	ena	exon	154729	154990	.	+	.	gene_id "CNAG_00052"; transcript_id "AFR92190"; exon_number "3"; gene_source "ena"; gene_biotype "protein_coding"; transcript_source "ena"; transcript_biotype "protein_coding"; exon_id "AFR92190-3";
1	ena	CDS	154729	154832	.	+	2	gene_id "CNAG_00052"; transcript_id "AFR92190"; exon_number "3"; gene_source "ena"; gene_biotype "protein_coding"; transcript_source "ena"; transcript_biotype "protein_coding"; protein_id "AFR92190"; protein_version "1";
1	ena	five_prime_utr	154270	154388	.	+	.	gene_id "CNAG_00052"; transcript_id "AFR92190"; gene_source "ena"; gene_biotype "protein_coding"; transcript_source "ena"; transcript_biotype "protein_coding";
1	ena	three_prime_utr	154833	154990	.	+	.	gene_id "CNAG_00052"; transcript_id "AFR92190"; gene_source "ena"; gene_biotype "protein_coding"; transcript_source "ena"; transcript_biotype "protein_coding";
1	ena	gene	155149	156184	.	+	.	gene_id "CNAG_00053"; gene_source "ena"; gene_biotype "protein_coding";
1	ena	transcript	155149	156184	.	+	.	gene_id "CNAG_00053"; transcript_id "AFR92191"; gene_source "ena"; gene_biotype "protein_coding"; transcript_source "ena"; transcript_biotype "protein_coding";
1	ena	exon	155149	155366	.	+	.	gene_id "CNAG_00053"; transcript_id "AFR92191"; exon_number "1"; gene_source "ena"; gene_biotype "protein_coding"; transcript_source "ena"; transcript_biotype "protein_coding"; exon_id "AFR92191-1";
1	ena	CDS	155313	155366	.	+	0	gene_id "CNAG_00053"; transcript_id "AFR92191"; exon_number "1"; gene_source "ena"; gene_biotype "protein_coding"; transcript_source "ena"; transcript_biotype "protein_coding"; protein_id "AFR92191"; protein_version "1";
1	ena	start_codon	155313	155315	.	+	0	gene_id "CNAG_00053"; transcript_id "AFR92191"; exon_number "1"; gene_source "ena"; gene_biotype "protein_coding"; transcript_source "ena"; transcript_biotype "protein_coding";
1	ena	exon	155439	155676	.	+	.	gene_id "CNAG_00053"; transcript_id "AFR92191"; exon_number "2"; gene_source "ena"; gene_biotype "protein_coding"; transcript_source "ena"; transcript_biotype "protein_coding"; exon_id "AFR92191-2";
1	ena	CDS	155439	155676	.	+	0	gene_id "CNAG_00053"; transcript_id "AFR92191"; exon_number "2"; gene_source "ena"; gene_biotype "protein_coding"; transcript_source "ena"; transcript_biotype "protein_coding"; protein_id "AFR92191"; protein_version "1";
1	ena	exon	155738	155825	.	+	.	gene_id "CNAG_00053"; transcript_id "AFR92191"; exon_number "3"; gene_source "ena"; gene_biotype "protein_coding"; transcript_source "ena"; transcript_biotype "protein_coding"; exon_id "AFR92191-3";
1	ena	CDS	155738	155825	.	+	2	gene_id "CNAG_00053"; transcript_id "AFR92191"; exon_number "3"; gene_source "ena"; gene_biotype "protein_coding"; transcript_source "ena"; transcript_biotype "protein_coding"; protein_id "AFR92191"; protein_version "1";
1	ena	exon	155890	155946	.	+	.	gene_id "CNAG_00053"; transcript_id "AFR92191"; exon_number "4"; gene_source "ena"; gene_biotype "protein_coding"; transcript_source "ena"; transcript_biotype "protein_coding"; exon_id "AFR92191-4";
1	ena	CDS	155890	155946	.	+	1	gene_id "CNAG_00053"; transcript_id "AFR92191"; exon_number "4"; gene_source "ena"; gene_biotype "protein_coding"; transcript_source "ena"; transcript_biotype "protein_coding"; protein_id "AFR92191"; protein_version "1";
1	ena	exon	155997	156184	.	+	.	gene_id "CNAG_00053"; transcript_id "AFR92191"; exon_number "5"; gene_source "ena"; gene_biotype "protein_coding"; transcript_source "ena"; transcript_biotype "protein_coding"; exon_id "AFR92191-5";
1	ena	CDS	155997	156087	.	+	1	gene_id "CNAG_00053"; transcript_id "AFR92191"; exon_number "5"; gene_source "ena"; gene_biotype "protein_coding"; transcript_source "ena"; transcript_biotype "protein_coding"; protein_id "AFR92191"; protein_version "1";
1	ena	five_prime_utr	155149	155312	.	+	.	gene_id "CNAG_00053"; transcript_id "AFR92191"; gene_source "ena"; gene_biotype "protein_coding"; transcript_source "ena"; transcript_biotype "protein_coding";
1	ena	three_prime_utr	156088	156184	.	+	.	gene_id "CNAG_00053"; transcript_id "AFR92191"; gene_source "ena"; gene_biotype "protein_coding"; transcript_source "ena"; transcript_biotype "protein_coding";
1	ena	gene	156009	157280	.	-	.	gene_id "CNAG_00054"; gene_source "ena"; gene_biotype "protein_coding";
1	ena	transcript	156009	157280	.	-	.	gene_id "CNAG_00054"; transcript_id "AFR92192"; gene_source "ena"; gene_biotype "protein_coding"; transcript_source "ena"; transcript_biotype "protein_coding";
1	ena	exon	156832	157280	.	-	.	gene_id "CNAG_00054"; transcript_id "AFR92192"; exon_number "1"; gene_source "ena"; gene_biotype "protein_coding"; transcript_source "ena"; transcript_biotype "protein_coding"; exon_id "AFR92192-1";
1	ena	CDS	156832	157146	.	-	0	gene_id "CNAG_00054"; transcript_id "AFR92192"; exon_number "1"; gene_source "ena"; gene_biotype "protein_coding"; transcript_source "ena"; transcript_biotype "protein_coding"; protein_id "AFR92192"; protein_version "1";
1	ena	start_codon	157144	157146	.	-	0	gene_id "CNAG_00054"; transcript_id "AFR92192"; exon_number "1"; gene_source "ena"; gene_biotype "protein_coding"; transcript_source "ena"; transcript_biotype "protein_coding";
1	ena	exon	156693	156762	.	-	.	gene_id "CNAG_00054"; transcript_id "AFR92192"; exon_number "2"; gene_source "ena"; gene_biotype "protein_coding"; transcript_source "ena"; transcript_biotype "protein_coding"; exon_id "AFR92192-2";
1	ena	CDS	156693	156762	.	-	0	gene_id "CNAG_00054"; transcript_id "AFR92192"; exon_number "2"; gene_source "ena"; gene_biotype "protein_coding"; transcript_source "ena"; transcript_biotype "protein_coding"; protein_id "AFR92192"; protein_version "1";
1	ena	exon	156009	156613	.	-	.	gene_id "CNAG_00054"; transcript_id "AFR92192"; exon_number "3"; gene_source "ena"; gene_biotype "protein_coding"; transcript_source "ena"; transcript_biotype "protein_coding"; exon_id "AFR92192-3";
1	ena	CDS	156294	156613	.	-	2	gene_id "CNAG_00054"; transcript_id "AFR92192"; exon_number "3"; gene_source "ena"; gene_biotype "protein_coding"; transcript_source "ena"; transcript_biotype "protein_coding"; protein_id "AFR92192"; protein_version "1";
1	ena	stop_codon	156291	156293	.	-	0	gene_id "CNAG_00054"; transcript_id "AFR92192"; exon_number "3"; gene_source "ena"; gene_biotype "protein_coding"; transcript_source "ena"; transcript_biotype "protein_coding";
1	ena	five_prime_utr	157147	157280	.	-	.	gene_id "CNAG_00054"; transcript_id "AFR92192"; gene_source "ena"; gene_biotype "protein_coding"; transcript_source "ena"; transcript_biotype "protein_coding";
1	ena	three_prime_utr	156009	156290	.	-	.	gene_id "CNAG_00054"; transcript_id "AFR92192"; gene_source "ena"; gene_biotype "protein_coding"; transcript_source "ena"; transcript_biotype "protein_coding";
1	ena	gene	157458	158951	.	+	.	gene_id "CNAG_00055"; gene_source "ena"; gene_biotype "protein_coding";
1	ena	transcript	157458	158951	.	+	.	gene_id "CNAG_00055"; transcript_id "AFR92193"; gene_source "ena"; gene_biotype "protein_coding"; transcript_source "ena"; transcript_biotype "protein_coding";
1	ena	exon	157458	158262	.	+	.	gene_id "CNAG_00055"; transcript_id "AFR92193"; exon_number "1"; gene_source "ena"; gene_biotype "protein_coding"; transcript_source "ena"; transcript_biotype "protein_coding"; exon_id "AFR92193-1";
1	ena	CDS	157520	158262	.	+	0	gene_id "CNAG_00055"; transcript_id "AFR92193"; exon_number "1"; gene_source "ena"; gene_biotype "protein_coding"; transcript_source "ena"; transcript_biotype "protein_coding"; protein_id "AFR92193"; protein_version "1";
1	ena	start_codon	157520	157522	.	+	0	gene_id "CNAG_00055"; transcript_id "AFR92193"; exon_number "1"; gene_source "ena"; gene_biotype "protein_coding"; transcript_source "ena"; transcript_biotype "protein_coding";
1	ena	exon	158317	158482	.	+	.	gene_id "CNAG_00055"; transcript_id "AFR92193"; exon_number "2"; gene_source "ena"; gene_biotype "protein_coding"; transcript_source "ena"; transcript_biotype "protein_coding"; exon_id "AFR92193-2";
1	ena	CDS	158317	158482	.	+	1	gene_id "CNAG_00055"; transcript_id "AFR92193"; exon_number "2"; gene_source "ena"; gene_biotype "protein_coding"; transcript_source "ena"; transcript_biotype "protein_coding"; protein_id "AFR92193"; protein_version "1";
1	ena	exon	158539	158951	.	+	.	gene_id "CNAG_00055"; transcript_id "AFR92193"; exon_number "3"; gene_source "ena"; gene_biotype "protein_coding"; transcript_source "ena"; transcript_biotype "protein_coding"; exon_id "AFR92193-3";
1	ena	CDS	158539	158796	.	+	0	gene_id "CNAG_00055"; transcript_id "AFR92193"; exon_number "3"; gene_source "ena"; gene_biotype "protein_coding"; transcript_source "ena"; transcript_biotype "protein_coding"; protein_id "AFR92193"; protein_version "1";
1	ena	five_prime_utr	157458	157519	.	+	.	gene_id "CNAG_00055"; transcript_id "AFR92193"; gene_source "ena"; gene_biotype "protein_coding"; transcript_source "ena"; transcript_biotype "protein_coding";
1	ena	three_prime_utr	158797	158951	.	+	.	gene_id "CNAG_00055"; transcript_id "AFR92193"; gene_source "ena"; gene_biotype "protein_coding"; transcript_source "ena"; transcript_biotype "protein_coding";
1	ena	gene	159061	161420	.	+	.	gene_id "CNAG_00056"; gene_source "ena"; gene_biotype "protein_coding";
1	ena	transcript	159061	161420	.	+	.	gene_id "CNAG_00056"; transcript_id "AFR92194"; gene_source "ena"; gene_biotype "protein_coding"; transcript_source "ena"; transcript_biotype "protein_coding";
1	ena	exon	159061	159224	.	+	.	gene_id "CNAG_00056"; transcript_id "AFR92194"; exon_number "1"; gene_source "ena"; gene_biotype "protein_coding"; transcript_source "ena"; transcript_biotype "protein_coding"; exon_id "AFR92194-1";
1	ena	CDS	159196	159224	.	+	0	gene_id "CNAG_00056"; transcript_id "AFR92194"; exon_number "1"; gene_source "ena"; gene_biotype "protein_coding"; transcript_source "ena"; transcript_biotype "protein_coding"; protein_id "AFR92194"; protein_version "1";
1	ena	start_codon	159196	159198	.	+	0	gene_id "CNAG_00056"; transcript_id "AFR92194"; exon_number "1"; gene_source "ena"; gene_biotype "protein_coding"; transcript_source "ena"; transcript_biotype "protein_coding";
1	ena	exon	159283	159766	.	+	.	gene_id "CNAG_00056"; transcript_id "AFR92194"; exon_number "2"; gene_source "ena"; gene_biotype "protein_coding"; transcript_source "ena"; transcript_biotype "protein_coding"; exon_id "AFR92194-2";
1	ena	CDS	159283	159766	.	+	1	gene_id "CNAG_00056"; transcript_id "AFR92194"; exon_number "2"; gene_source "ena"; gene_biotype "protein_coding"; transcript_source "ena"; transcript_biotype "protein_coding"; protein_id "AFR92194"; protein_version "1";
1	ena	exon	159821	161420	.	+	.	gene_id "CNAG_00056"; transcript_id "AFR92194"; exon_number "3"; gene_source "ena"; gene_biotype "protein_coding"; transcript_source "ena"; transcript_biotype "protein_coding"; exon_id "AFR92194-3";
1	ena	CDS	159821	161332	.	+	0	gene_id "CNAG_00056"; transcript_id "AFR92194"; exon_number "3"; gene_source "ena"; gene_biotype "protein_coding"; transcript_source "ena"; transcript_biotype "protein_coding"; protein_id "AFR92194"; protein_version "1";
1	ena	five_prime_utr	159061	159195	.	+	.	gene_id "CNAG_00056"; transcript_id "AFR92194"; gene_source "ena"; gene_biotype "protein_coding"; transcript_source "ena"; transcript_biotype "protein_coding";
1	ena	three_prime_utr	161333	161420	.	+	.	gene_id "CNAG_00056"; transcript_id "AFR92194"; gene_source "ena"; gene_biotype "protein_coding"; transcript_source "ena"; transcript_biotype "protein_coding";
1	ena	gene	161616	163256	.	-	.	gene_id "CNAG_00057"; gene_source "ena"; gene_biotype "protein_coding";
1	ena	transcript	161616	163256	.	-	.	gene_id "CNAG_00057"; transcript_id "AFR92195"; gene_source "ena"; gene_biotype "protein_coding"; transcript_source "ena"; transcript_biotype "protein_coding";
1	ena	exon	162982	163256	.	-	.	gene_id "CNAG_00057"; transcript_id "AFR92195"; exon_number "1"; gene_source "ena"; gene_biotype "protein_coding"; transcript_source "ena"; transcript_biotype "protein_coding"; exon_id "AFR92195-1";
1	ena	CDS	162982	163128	.	-	0	gene_id "CNAG_00057"; transcript_id "AFR92195"; exon_number "1"; gene_source "ena"; gene_biotype "protein_coding"; transcript_source "ena"; transcript_biotype "protein_coding"; protein_id "AFR92195"; protein_version "1";
1	ena	start_codon	163126	163128	.	-	0	gene_id "CNAG_00057"; transcript_id "AFR92195"; exon_number "1"; gene_source "ena"; gene_biotype "protein_coding"; transcript_source "ena"; transcript_biotype "protein_coding";
1	ena	exon	162635	162855	.	-	.	gene_id "CNAG_00057"; transcript_id "AFR92195"; exon_number "2"; gene_source "ena"; gene_biotype "protein_coding"; transcript_source "ena"; transcript_biotype "protein_coding"; exon_id "AFR92195-2";
1	ena	CDS	162635	162855	.	-	0	gene_id "CNAG_00057"; transcript_id "AFR92195"; exon_number "2"; gene_source "ena"; gene_biotype "protein_coding"; transcript_source "ena"; transcript_biotype "protein_coding"; protein_id "AFR92195"; protein_version "1";
1	ena	exon	162491	162575	.	-	.	gene_id "CNAG_00057"; transcript_id "AFR92195"; exon_number "3"; gene_source "ena"; gene_biotype "protein_coding"; transcript_source "ena"; transcript_biotype "protein_coding"; exon_id "AFR92195-3";
1	ena	CDS	162491	162575	.	-	1	gene_id "CNAG_00057"; transcript_id "AFR92195"; exon_number "3"; gene_source "ena"; gene_biotype "protein_coding"; transcript_source "ena"; transcript_biotype "protein_coding"; protein_id "AFR92195"; protein_version "1";
1	ena	exon	162298	162438	.	-	.	gene_id "CNAG_00057"; transcript_id "AFR92195"; exon_number "4"; gene_source "ena"; gene_biotype "protein_coding"; transcript_source "ena"; transcript_biotype "protein_coding"; exon_id "AFR92195-4";
1	ena	CDS	162298	162438	.	-	0	gene_id "CNAG_00057"; transcript_id "AFR92195"; exon_number "4"; gene_source "ena"; gene_biotype "protein_coding"; transcript_source "ena"; transcript_biotype "protein_coding"; protein_id "AFR92195"; protein_version "1";
1	ena	exon	161616	162241	.	-	.	gene_id "CNAG_00057"; transcript_id "AFR92195"; exon_number "5"; gene_source "ena"; gene_biotype "protein_coding"; transcript_source "ena"; transcript_biotype "protein_coding"; exon_id "AFR92195-5";
1	ena	CDS	161783	162241	.	-	0	gene_id "CNAG_00057"; transcript_id "AFR92195"; exon_number "5"; gene_source "ena"; gene_biotype "protein_coding"; transcript_source "ena"; transcript_biotype "protein_coding"; protein_id "AFR92195"; protein_version "1";
1	ena	five_prime_utr	163129	163256	.	-	.	gene_id "CNAG_00057"; transcript_id "AFR92195"; gene_source "ena"; gene_biotype "protein_coding"; transcript_source "ena"; transcript_biotype "protein_coding";
1	ena	three_prime_utr	161616	161782	.	-	.	gene_id "CNAG_00057"; transcript_id "AFR92195"; gene_source "ena"; gene_biotype "protein_coding"; transcript_source "ena"; transcript_biotype "protein_coding";
1	ena	gene	163415	166225	.	-	.	gene_id "CNAG_00058"; gene_source "ena"; gene_biotype "protein_coding";
1	ena	transcript	163415	166225	.	-	.	gene_id "CNAG_00058"; transcript_id "AFR92196"; gene_source "ena"; gene_biotype "protein_coding"; transcript_source "ena"; transcript_biotype "protein_coding";
1	ena	exon	166097	166225	.	-	.	gene_id "CNAG_00058"; transcript_id "AFR92196"; exon_number "1"; gene_source "ena"; gene_biotype "protein_coding"; transcript_source "ena"; transcript_biotype "protein_coding"; exon_id "AFR92196-1";
1	ena	CDS	166097	166147	.	-	0	gene_id "CNAG_00058"; transcript_id "AFR92196"; exon_number "1"; gene_source "ena"; gene_biotype "protein_coding"; transcript_source "ena"; transcript_biotype "protein_coding"; protein_id "AFR92196"; protein_version "1";
1	ena	start_codon	166145	166147	.	-	0	gene_id "CNAG_00058"; transcript_id "AFR92196"; exon_number "1"; gene_source "ena"; gene_biotype "protein_coding"; transcript_source "ena"; transcript_biotype "protein_coding";
1	ena	exon	166011	166036	.	-	.	gene_id "CNAG_00058"; transcript_id "AFR92196"; exon_number "2"; gene_source "ena"; gene_biotype "protein_coding"; transcript_source "ena"; transcript_biotype "protein_coding"; exon_id "AFR92196-2";
1	ena	CDS	166011	166036	.	-	0	gene_id "CNAG_00058"; transcript_id "AFR92196"; exon_number "2"; gene_source "ena"; gene_biotype "protein_coding"; transcript_source "ena"; transcript_biotype "protein_coding"; protein_id "AFR92196"; protein_version "1";
1	ena	exon	165879	165924	.	-	.	gene_id "CNAG_00058"; transcript_id "AFR92196"; exon_number "3"; gene_source "ena"; gene_biotype "protein_coding"; transcript_source "ena"; transcript_biotype "protein_coding"; exon_id "AFR92196-3";
1	ena	CDS	165879	165924	.	-	1	gene_id "CNAG_00058"; transcript_id "AFR92196"; exon_number "3"; gene_source "ena"; gene_biotype "protein_coding"; transcript_source "ena"; transcript_biotype "protein_coding"; protein_id "AFR92196"; protein_version "1";
1	ena	exon	165784	165808	.	-	.	gene_id "CNAG_00058"; transcript_id "AFR92196"; exon_number "4"; gene_source "ena"; gene_biotype "protein_coding"; transcript_source "ena"; transcript_biotype "protein_coding"; exon_id "AFR92196-4";
1	ena	CDS	165784	165808	.	-	0	gene_id "CNAG_00058"; transcript_id "AFR92196"; exon_number "4"; gene_source "ena"; gene_biotype "protein_coding"; transcript_source "ena"; transcript_biotype "protein_coding"; protein_id "AFR92196"; protein_version "1";
1	ena	exon	165519	165719	.	-	.	gene_id "CNAG_00058"; transcript_id "AFR92196"; exon_number "5"; gene_source "ena"; gene_biotype "protein_coding"; transcript_source "ena"; transcript_biotype "protein_coding"; exon_id "AFR92196-5";
1	ena	CDS	165519	165719	.	-	2	gene_id "CNAG_00058"; transcript_id "AFR92196"; exon_number "5"; gene_source "ena"; gene_biotype "protein_coding"; transcript_source "ena"; transcript_biotype "protein_coding"; protein_id "AFR92196"; protein_version "1";
1	ena	exon	165324	165454	.	-	.	gene_id "CNAG_00058"; transcript_id "AFR92196"; exon_number "6"; gene_source "ena"; gene_biotype "protein_coding"; transcript_source "ena"; transcript_biotype "protein_coding"; exon_id "AFR92196-6";
1	ena	CDS	165324	165454	.	-	2	gene_id "CNAG_00058"; transcript_id "AFR92196"; exon_number "6"; gene_source "ena"; gene_biotype "protein_coding"; transcript_source "ena"; transcript_biotype "protein_coding"; protein_id "AFR92196"; protein_version "1";
1	ena	exon	165194	165261	.	-	.	gene_id "CNAG_00058"; transcript_id "AFR92196"; exon_number "7"; gene_source "ena"; gene_biotype "protein_coding"; transcript_source "ena"; transcript_biotype "protein_coding"; exon_id "AFR92196-7";
1	ena	CDS	165194	165261	.	-	0	gene_id "CNAG_00058"; transcript_id "AFR92196"; exon_number "7"; gene_source "ena"; gene_biotype "protein_coding"; transcript_source "ena"; transcript_biotype "protein_coding"; protein_id "AFR92196"; protein_version "1";
1	ena	exon	164781	165122	.	-	.	gene_id "CNAG_00058"; transcript_id "AFR92196"; exon_number "8"; gene_source "ena"; gene_biotype "protein_coding"; transcript_source "ena"; transcript_biotype "protein_coding"; exon_id "AFR92196-8";
1	ena	CDS	164781	165122	.	-	1	gene_id "CNAG_00058"; transcript_id "AFR92196"; exon_number "8"; gene_source "ena"; gene_biotype "protein_coding"; transcript_source "ena"; transcript_biotype "protein_coding"; protein_id "AFR92196"; protein_version "1";
1	ena	exon	164601	164721	.	-	.	gene_id "CNAG_00058"; transcript_id "AFR92196"; exon_number "9"; gene_source "ena"; gene_biotype "protein_coding"; transcript_source "ena"; transcript_biotype "protein_coding"; exon_id "AFR92196-9";
1	ena	CDS	164601	164721	.	-	1	gene_id "CNAG_00058"; transcript_id "AFR92196"; exon_number "9"; gene_source "ena"; gene_biotype "protein_coding"; transcript_source "ena"; transcript_biotype "protein_coding"; protein_id "AFR92196"; protein_version "1";
1	ena	exon	164329	164514	.	-	.	gene_id "CNAG_00058"; transcript_id "AFR92196"; exon_number "10"; gene_source "ena"; gene_biotype "protein_coding"; transcript_source "ena"; transcript_biotype "protein_coding"; exon_id "AFR92196-10";
1	ena	CDS	164329	164514	.	-	0	gene_id "CNAG_00058"; transcript_id "AFR92196"; exon_number "10"; gene_source "ena"; gene_biotype "protein_coding"; transcript_source "ena"; transcript_biotype "protein_coding"; protein_id "AFR92196"; protein_version "1";
1	ena	exon	164132	164269	.	-	.	gene_id "CNAG_00058"; transcript_id "AFR92196"; exon_number "11"; gene_source "ena"; gene_biotype "protein_coding"; transcript_source "ena"; transcript_biotype "protein_coding"; exon_id "AFR92196-11";
1	ena	CDS	164132	164269	.	-	0	gene_id "CNAG_00058"; transcript_id "AFR92196"; exon_number "11"; gene_source "ena"; gene_biotype "protein_coding"; transcript_source "ena"; transcript_biotype "protein_coding"; protein_id "AFR92196"; protein_version "1";
1	ena	exon	163893	164073	.	-	.	gene_id "CNAG_00058"; transcript_id "AFR92196"; exon_number "12"; gene_source "ena"; gene_biotype "protein_coding"; transcript_source "ena"; transcript_biotype "protein_coding"; exon_id "AFR92196-12";
1	ena	CDS	163893	164073	.	-	0	gene_id "CNAG_00058"; transcript_id "AFR92196"; exon_number "12"; gene_source "ena"; gene_biotype "protein_coding"; transcript_source "ena"; transcript_biotype "protein_coding"; protein_id "AFR92196"; protein_version "1";
1	ena	exon	163415	163592	.	-	.	gene_id "CNAG_00058"; transcript_id "AFR92196"; exon_number "13"; gene_source "ena"; gene_biotype "protein_coding"; transcript_source "ena"; transcript_biotype "protein_coding"; exon_id "AFR92196-13";
1	ena	CDS	163462	163592	.	-	2	gene_id "CNAG_00058"; transcript_id "AFR92196"; exon_number "13"; gene_source "ena"; gene_biotype "protein_coding"; transcript_source "ena"; transcript_biotype "protein_coding"; protein_id "AFR92196"; protein_version "1";
1	ena	five_prime_utr	166148	166225	.	-	.	gene_id "CNAG_00058"; transcript_id "AFR92196"; gene_source "ena"; gene_biotype "protein_coding"; transcript_source "ena"; transcript_biotype "protein_coding";
1	ena	three_prime_utr	163415	163461	.	-	.	gene_id "CNAG_00058"; transcript_id "AFR92196"; gene_source "ena"; gene_biotype "protein_coding"; transcript_source "ena"; transcript_biotype "protein_coding";
1	ena	gene	166381	167435	.	+	.	gene_id "CNAG_00059"; gene_source "ena"; gene_biotype "protein_coding";
1	ena	transcript	166381	167435	.	+	.	gene_id "CNAG_00059"; transcript_id "AFR92197"; gene_source "ena"; gene_biotype "protein_coding"; transcript_source "ena"; transcript_biotype "protein_coding";
1	ena	exon	166381	166555	.	+	.	gene_id "CNAG_00059"; transcript_id "AFR92197"; exon_number "1"; gene_source "ena"; gene_biotype "protein_coding"; transcript_source "ena"; transcript_biotype "protein_coding"; exon_id "AFR92197-1";
1	ena	CDS	166436	166555	.	+	0	gene_id "CNAG_00059"; transcript_id "AFR92197"; exon_number "1"; gene_source "ena"; gene_biotype "protein_coding"; transcript_source "ena"; transcript_biotype "protein_coding"; protein_id "AFR92197"; protein_version "1";
1	ena	start_codon	166436	166438	.	+	0	gene_id "CNAG_00059"; transcript_id "AFR92197"; exon_number "1"; gene_source "ena"; gene_biotype "protein_coding"; transcript_source "ena"; transcript_biotype "protein_coding";
1	ena	exon	166641	167041	.	+	.	gene_id "CNAG_00059"; transcript_id "AFR92197"; exon_number "2"; gene_source "ena"; gene_biotype "protein_coding"; transcript_source "ena"; transcript_biotype "protein_coding"; exon_id "AFR92197-2";
1	ena	CDS	166641	167041	.	+	0	gene_id "CNAG_00059"; transcript_id "AFR92197"; exon_number "2"; gene_source "ena"; gene_biotype "protein_coding"; transcript_source "ena"; transcript_biotype "protein_coding"; protein_id "AFR92197"; protein_version "1";
1	ena	exon	167106	167435	.	+	.	gene_id "CNAG_00059"; transcript_id "AFR92197"; exon_number "3"; gene_source "ena"; gene_biotype "protein_coding"; transcript_source "ena"; transcript_biotype "protein_coding"; exon_id "AFR92197-3";
1	ena	CDS	167106	167376	.	+	1	gene_id "CNAG_00059"; transcript_id "AFR92197"; exon_number "3"; gene_source "ena"; gene_biotype "protein_coding"; transcript_source "ena"; transcript_biotype "protein_coding"; protein_id "AFR92197"; protein_version "1";
1	ena	five_prime_utr	166381	166435	.	+	.	gene_id "CNAG_00059"; transcript_id "AFR92197"; gene_source "ena"; gene_biotype "protein_coding"; transcript_source "ena"; transcript_biotype "protein_coding";
1	ena	three_prime_utr	167377	167435	.	+	.	gene_id "CNAG_00059"; transcript_id "AFR92197"; gene_source "ena"; gene_biotype "protein_coding"; transcript_source "ena"; transcript_biotype "protein_coding";
1	ena	gene	167388	169095	.	-	.	gene_id "CNAG_00060"; gene_source "ena"; gene_biotype "protein_coding";
1	ena	transcript	167388	169095	.	-	.	gene_id "CNAG_00060"; transcript_id "AFR92198"; gene_source "ena"; gene_biotype "protein_coding"; transcript_source "ena"; transcript_biotype "protein_coding";
1	ena	exon	168901	169095	.	-	.	gene_id "CNAG_00060"; transcript_id "AFR92198"; exon_number "1"; gene_source "ena"; gene_biotype "protein_coding"; transcript_source "ena"; transcript_biotype "protein_coding"; exon_id "AFR92198-1";
1	ena	CDS	168901	169005	.	-	0	gene_id "CNAG_00060"; transcript_id "AFR92198"; exon_number "1"; gene_source "ena"; gene_biotype "protein_coding"; transcript_source "ena"; transcript_biotype "protein_coding"; protein_id "AFR92198"; protein_version "1";
1	ena	start_codon	169003	169005	.	-	0	gene_id "CNAG_00060"; transcript_id "AFR92198"; exon_number "1"; gene_source "ena"; gene_biotype "protein_coding"; transcript_source "ena"; transcript_biotype "protein_coding";
1	ena	exon	168835	168840	.	-	.	gene_id "CNAG_00060"; transcript_id "AFR92198"; exon_number "2"; gene_source "ena"; gene_biotype "protein_coding"; transcript_source "ena"; transcript_biotype "protein_coding"; exon_id "AFR92198-2";
1	ena	CDS	168835	168840	.	-	0	gene_id "CNAG_00060"; transcript_id "AFR92198"; exon_number "2"; gene_source "ena"; gene_biotype "protein_coding"; transcript_source "ena"; transcript_biotype "protein_coding"; protein_id "AFR92198"; protein_version "1";
1	ena	exon	168702	168779	.	-	.	gene_id "CNAG_00060"; transcript_id "AFR92198"; exon_number "3"; gene_source "ena"; gene_biotype "protein_coding"; transcript_source "ena"; transcript_biotype "protein_coding"; exon_id "AFR92198-3";
1	ena	CDS	168702	168779	.	-	0	gene_id "CNAG_00060"; transcript_id "AFR92198"; exon_number "3"; gene_source "ena"; gene_biotype "protein_coding"; transcript_source "ena"; transcript_biotype "protein_coding"; protein_id "AFR92198"; protein_version "1";
1	ena	exon	168256	168627	.	-	.	gene_id "CNAG_00060"; transcript_id "AFR92198"; exon_number "4"; gene_source "ena"; gene_biotype "protein_coding"; transcript_source "ena"; transcript_biotype "protein_coding"; exon_id "AFR92198-4";
1	ena	CDS	168256	168627	.	-	0	gene_id "CNAG_00060"; transcript_id "AFR92198"; exon_number "4"; gene_source "ena"; gene_biotype "protein_coding"; transcript_source "ena"; transcript_biotype "protein_coding"; protein_id "AFR92198"; protein_version "1";
1	ena	exon	167987	168187	.	-	.	gene_id "CNAG_00060"; transcript_id "AFR92198"; exon_number "5"; gene_source "ena"; gene_biotype "protein_coding"; transcript_source "ena"; transcript_biotype "protein_coding"; exon_id "AFR92198-5";
1	ena	CDS	167987	168187	.	-	0	gene_id "CNAG_00060"; transcript_id "AFR92198"; exon_number "5"; gene_source "ena"; gene_biotype "protein_coding"; transcript_source "ena"; transcript_biotype "protein_coding"; protein_id "AFR92198"; protein_version "1";
1	ena	exon	167388	167922	.	-	.	gene_id "CNAG_00060"; transcript_id "AFR92198"; exon_number "6"; gene_source "ena"; gene_biotype "protein_coding"; transcript_source "ena"; transcript_biotype "protein_coding"; exon_id "AFR92198-6";
1	ena	CDS	167479	167922	.	-	0	gene_id "CNAG_00060"; transcript_id "AFR92198"; exon_number "6"; gene_source "ena"; gene_biotype "protein_coding"; transcript_source "ena"; transcript_biotype "protein_coding"; protein_id "AFR92198"; protein_version "1";
1	ena	five_prime_utr	169006	169095	.	-	.	gene_id "CNAG_00060"; transcript_id "AFR92198"; gene_source "ena"; gene_biotype "protein_coding"; transcript_source "ena"; transcript_biotype "protein_coding";
1	ena	three_prime_utr	167388	167478	.	-	.	gene_id "CNAG_00060"; transcript_id "AFR92198"; gene_source "ena"; gene_biotype "protein_coding"; transcript_source "ena"; transcript_biotype "protein_coding";
1	ena	transcript	167479	168579	.	-	.	gene_id "CNAG_00060"; transcript_id "AGV15266"; gene_source "ena"; gene_biotype "protein_coding"; transcript_source "ena"; transcript_biotype "protein_coding";
1	ena	exon	168256	168579	.	-	.	gene_id "CNAG_00060"; transcript_id "AGV15266"; exon_number "1"; gene_source "ena"; gene_biotype "protein_coding"; transcript_source "ena"; transcript_biotype "protein_coding"; exon_id "AGV15266-1";
1	ena	CDS	168256	168579	.	-	0	gene_id "CNAG_00060"; transcript_id "AGV15266"; exon_number "1"; gene_source "ena"; gene_biotype "protein_coding"; transcript_source "ena"; transcript_biotype "protein_coding"; protein_id "AGV15266"; protein_version "1";
1	ena	start_codon	168577	168579	.	-	0	gene_id "CNAG_00060"; transcript_id "AGV15266"; exon_number "1"; gene_source "ena"; gene_biotype "protein_coding"; transcript_source "ena"; transcript_biotype "protein_coding";
1	ena	exon	167987	168187	.	-	.	gene_id "CNAG_00060"; transcript_id "AGV15266"; exon_number "2"; gene_source "ena"; gene_biotype "protein_coding"; transcript_source "ena"; transcript_biotype "protein_coding"; exon_id "AFR92198-5";
1	ena	CDS	167987	168187	.	-	0	gene_id "CNAG_00060"; transcript_id "AGV15266"; exon_number "2"; gene_source "ena"; gene_biotype "protein_coding"; transcript_source "ena"; transcript_biotype "protein_coding"; protein_id "AGV15266"; protein_version "1";
1	ena	exon	167479	167922	.	-	.	gene_id "CNAG_00060"; transcript_id "AGV15266"; exon_number "3"; gene_source "ena"; gene_biotype "protein_coding"; transcript_source "ena"; transcript_biotype "protein_coding"; exon_id "AGV15266-3";
1	ena	CDS	167482	167922	.	-	0	gene_id "CNAG_00060"; transcript_id "AGV15266"; exon_number "3"; gene_source "ena"; gene_biotype "protein_coding"; transcript_source "ena"; transcript_biotype "protein_coding"; protein_id "AGV15266"; protein_version "1";
1	ena	stop_codon	167479	167481	.	-	0	gene_id "CNAG_00060"; transcript_id "AGV15266"; exon_number "3"; gene_source "ena"; gene_biotype "protein_coding"; transcript_source "ena"; transcript_biotype "protein_coding";
1	ena	gene	169187	172162	.	+	.	gene_id "CNAG_00061"; gene_source "ena"; gene_biotype "protein_coding";
1	ena	transcript	169187	172162	.	+	.	gene_id "CNAG_00061"; transcript_id "AFR92199"; gene_source "ena"; gene_biotype "protein_coding"; transcript_source "ena"; transcript_biotype "protein_coding";
1	ena	exon	169187	169348	.	+	.	gene_id "CNAG_00061"; transcript_id "AFR92199"; exon_number "1"; gene_source "ena"; gene_biotype "protein_coding"; transcript_source "ena"; transcript_biotype "protein_coding"; exon_id "AFR92199-1";
1	ena	CDS	169310	169348	.	+	0	gene_id "CNAG_00061"; transcript_id "AFR92199"; exon_number "1"; gene_source "ena"; gene_biotype "protein_coding"; transcript_source "ena"; transcript_biotype "protein_coding"; protein_id "AFR92199"; protein_version "1";
1	ena	start_codon	169310	169312	.	+	0	gene_id "CNAG_00061"; transcript_id "AFR92199"; exon_number "1"; gene_source "ena"; gene_biotype "protein_coding"; transcript_source "ena"; transcript_biotype "protein_coding";
1	ena	exon	169405	169887	.	+	.	gene_id "CNAG_00061"; transcript_id "AFR92199"; exon_number "2"; gene_source "ena"; gene_biotype "protein_coding"; transcript_source "ena"; transcript_biotype "protein_coding"; exon_id "AFR92199-2";
1	ena	CDS	169405	169887	.	+	0	gene_id "CNAG_00061"; transcript_id "AFR92199"; exon_number "2"; gene_source "ena"; gene_biotype "protein_coding"; transcript_source "ena"; transcript_biotype "protein_coding"; protein_id "AFR92199"; protein_version "1";
1	ena	exon	169943	170479	.	+	.	gene_id "CNAG_00061"; transcript_id "AFR92199"; exon_number "3"; gene_source "ena"; gene_biotype "protein_coding"; transcript_source "ena"; transcript_biotype "protein_coding"; exon_id "AFR92199-3";
1	ena	CDS	169943	170479	.	+	0	gene_id "CNAG_00061"; transcript_id "AFR92199"; exon_number "3"; gene_source "ena"; gene_biotype "protein_coding"; transcript_source "ena"; transcript_biotype "protein_coding"; protein_id "AFR92199"; protein_version "1";
1	ena	exon	170532	170658	.	+	.	gene_id "CNAG_00061"; transcript_id "AFR92199"; exon_number "4"; gene_source "ena"; gene_biotype "protein_coding"; transcript_source "ena"; transcript_biotype "protein_coding"; exon_id "AFR92199-4";
1	ena	CDS	170532	170658	.	+	0	gene_id "CNAG_00061"; transcript_id "AFR92199"; exon_number "4"; gene_source "ena"; gene_biotype "protein_coding"; transcript_source "ena"; transcript_biotype "protein_coding"; protein_id "AFR92199"; protein_version "1";
1	ena	exon	170709	170851	.	+	.	gene_id "CNAG_00061"; transcript_id "AFR92199"; exon_number "5"; gene_source "ena"; gene_biotype "protein_coding"; transcript_source "ena"; transcript_biotype "protein_coding"; exon_id "AFR92199-5";
1	ena	CDS	170709	170851	.	+	2	gene_id "CNAG_00061"; transcript_id "AFR92199"; exon_number "5"; gene_source "ena"; gene_biotype "protein_coding"; transcript_source "ena"; transcript_biotype "protein_coding"; protein_id "AFR92199"; protein_version "1";
1	ena	exon	170919	172162	.	+	.	gene_id "CNAG_00061"; transcript_id "AFR92199"; exon_number "6"; gene_source "ena"; gene_biotype "protein_coding"; transcript_source "ena"; transcript_biotype "protein_coding"; exon_id "AFR92199-6";
1	ena	CDS	170919	170984	.	+	0	gene_id "CNAG_00061"; transcript_id "AFR92199"; exon_number "6"; gene_source "ena"; gene_biotype "protein_coding"; transcript_source "ena"; transcript_biotype "protein_coding"; protein_id "AFR92199"; protein_version "1";
1	ena	five_prime_utr	169187	169309	.	+	.	gene_id "CNAG_00061"; transcript_id "AFR92199"; gene_source "ena"; gene_biotype "protein_coding"; transcript_source "ena"; transcript_biotype "protein_coding";
1	ena	three_prime_utr	170985	172162	.	+	.	gene_id "CNAG_00061"; transcript_id "AFR92199"; gene_source "ena"; gene_biotype "protein_coding"; transcript_source "ena"; transcript_biotype "protein_coding";
1	ena	gene	172122	174256	.	-	.	gene_id "CNAG_00062"; gene_source "ena"; gene_biotype "protein_coding";
1	ena	transcript	172122	174256	.	-	.	gene_id "CNAG_00062"; transcript_id "AFR92200"; gene_source "ena"; gene_biotype "protein_coding"; transcript_source "ena"; transcript_biotype "protein_coding";
1	ena	exon	174090	174256	.	-	.	gene_id "CNAG_00062"; transcript_id "AFR92200"; exon_number "1"; gene_source "ena"; gene_biotype "protein_coding"; transcript_source "ena"; transcript_biotype "protein_coding"; exon_id "AFR92200-1";
1	ena	CDS	174090	174201	.	-	0	gene_id "CNAG_00062"; transcript_id "AFR92200"; exon_number "1"; gene_source "ena"; gene_biotype "protein_coding"; transcript_source "ena"; transcript_biotype "protein_coding"; protein_id "AFR92200"; protein_version "1";
1	ena	start_codon	174199	174201	.	-	0	gene_id "CNAG_00062"; transcript_id "AFR92200"; exon_number "1"; gene_source "ena"; gene_biotype "protein_coding"; transcript_source "ena"; transcript_biotype "protein_coding";
1	ena	exon	173868	174020	.	-	.	gene_id "CNAG_00062"; transcript_id "AFR92200"; exon_number "2"; gene_source "ena"; gene_biotype "protein_coding"; transcript_source "ena"; transcript_biotype "protein_coding"; exon_id "AFR92200-2";
1	ena	CDS	173868	174020	.	-	2	gene_id "CNAG_00062"; transcript_id "AFR92200"; exon_number "2"; gene_source "ena"; gene_biotype "protein_coding"; transcript_source "ena"; transcript_biotype "protein_coding"; protein_id "AFR92200"; protein_version "1";
1	ena	exon	173537	173796	.	-	.	gene_id "CNAG_00062"; transcript_id "AFR92200"; exon_number "3"; gene_source "ena"; gene_biotype "protein_coding"; transcript_source "ena"; transcript_biotype "protein_coding"; exon_id "AFR92200-3";
1	ena	CDS	173537	173796	.	-	2	gene_id "CNAG_00062"; transcript_id "AFR92200"; exon_number "3"; gene_source "ena"; gene_biotype "protein_coding"; transcript_source "ena"; transcript_biotype "protein_coding"; protein_id "AFR92200"; protein_version "1";
1	ena	exon	173332	173468	.	-	.	gene_id "CNAG_00062"; transcript_id "AFR92200"; exon_number "4"; gene_source "ena"; gene_biotype "protein_coding"; transcript_source "ena"; transcript_biotype "protein_coding"; exon_id "AFR92200-4";
1	ena	CDS	173332	173468	.	-	0	gene_id "CNAG_00062"; transcript_id "AFR92200"; exon_number "4"; gene_source "ena"; gene_biotype "protein_coding"; transcript_source "ena"; transcript_biotype "protein_coding"; protein_id "AFR92200"; protein_version "1";
1	ena	exon	172487	173279	.	-	.	gene_id "CNAG_00062"; transcript_id "AFR92200"; exon_number "5"; gene_source "ena"; gene_biotype "protein_coding"; transcript_source "ena"; transcript_biotype "protein_coding"; exon_id "AFR92200-5";
1	ena	CDS	172487	173279	.	-	1	gene_id "CNAG_00062"; transcript_id "AFR92200"; exon_number "5"; gene_source "ena"; gene_biotype "protein_coding"; transcript_source "ena"; transcript_biotype "protein_coding"; protein_id "AFR92200"; protein_version "1";
1	ena	exon	172122	172419	.	-	.	gene_id "CNAG_00062"; transcript_id "AFR92200"; exon_number "6"; gene_source "ena"; gene_biotype "protein_coding"; transcript_source "ena"; transcript_biotype "protein_coding"; exon_id "AFR92200-6";
1	ena	CDS	172282	172419	.	-	0	gene_id "CNAG_00062"; transcript_id "AFR92200"; exon_number "6"; gene_source "ena"; gene_biotype "protein_coding"; transcript_source "ena"; transcript_biotype "protein_coding"; protein_id "AFR92200"; protein_version "1";
1	ena	five_prime_utr	174202	174256	.	-	.	gene_id "CNAG_00062"; transcript_id "AFR92200"; gene_source "ena"; gene_biotype "protein_coding"; transcript_source "ena"; transcript_biotype "protein_coding";
1	ena	three_prime_utr	172122	172281	.	-	.	gene_id "CNAG_00062"; transcript_id "AFR92200"; gene_source "ena"; gene_biotype "protein_coding"; transcript_source "ena"; transcript_biotype "protein_coding";
1	ena	gene	174412	175908	.	+	.	gene_id "CNAG_00063"; gene_source "ena"; gene_biotype "protein_coding";
1	ena	transcript	174412	175908	.	+	.	gene_id "CNAG_00063"; transcript_id "AFR92201"; gene_source "ena"; gene_biotype "protein_coding"; transcript_source "ena"; transcript_biotype "protein_coding";
1	ena	exon	174412	174848	.	+	.	gene_id "CNAG_00063"; transcript_id "AFR92201"; exon_number "1"; gene_source "ena"; gene_biotype "protein_coding"; transcript_source "ena"; transcript_biotype "protein_coding"; exon_id "AFR92201-1";
1	ena	CDS	174725	174848	.	+	0	gene_id "CNAG_00063"; transcript_id "AFR92201"; exon_number "1"; gene_source "ena"; gene_biotype "protein_coding"; transcript_source "ena"; transcript_biotype "protein_coding"; protein_id "AFR92201"; protein_version "1";
1	ena	start_codon	174725	174727	.	+	0	gene_id "CNAG_00063"; transcript_id "AFR92201"; exon_number "1"; gene_source "ena"; gene_biotype "protein_coding"; transcript_source "ena"; transcript_biotype "protein_coding";
1	ena	exon	174980	175128	.	+	.	gene_id "CNAG_00063"; transcript_id "AFR92201"; exon_number "2"; gene_source "ena"; gene_biotype "protein_coding"; transcript_source "ena"; transcript_biotype "protein_coding"; exon_id "AFR92201-2";
1	ena	CDS	174980	175128	.	+	2	gene_id "CNAG_00063"; transcript_id "AFR92201"; exon_number "2"; gene_source "ena"; gene_biotype "protein_coding"; transcript_source "ena"; transcript_biotype "protein_coding"; protein_id "AFR92201"; protein_version "1";
1	ena	exon	175299	175420	.	+	.	gene_id "CNAG_00063"; transcript_id "AFR92201"; exon_number "3"; gene_source "ena"; gene_biotype "protein_coding"; transcript_source "ena"; transcript_biotype "protein_coding"; exon_id "AFR92201-3";
1	ena	CDS	175299	175420	.	+	0	gene_id "CNAG_00063"; transcript_id "AFR92201"; exon_number "3"; gene_source "ena"; gene_biotype "protein_coding"; transcript_source "ena"; transcript_biotype "protein_coding"; protein_id "AFR92201"; protein_version "1";
1	ena	exon	175565	175908	.	+	.	gene_id "CNAG_00063"; transcript_id "AFR92201"; exon_number "4"; gene_source "ena"; gene_biotype "protein_coding"; transcript_source "ena"; transcript_biotype "protein_coding"; exon_id "AFR92201-4";
1	ena	CDS	175565	175649	.	+	1	gene_id "CNAG_00063"; transcript_id "AFR92201"; exon_number "4"; gene_source "ena"; gene_biotype "protein_coding"; transcript_source "ena"; transcript_biotype "protein_coding"; protein_id "AFR92201"; protein_version "1";
1	ena	five_prime_utr	174412	174724	.	+	.	gene_id "CNAG_00063"; transcript_id "AFR92201"; gene_source "ena"; gene_biotype "protein_coding"; transcript_source "ena"; transcript_biotype "protein_coding";
1	ena	three_prime_utr	175650	175908	.	+	.	gene_id "CNAG_00063"; transcript_id "AFR92201"; gene_source "ena"; gene_biotype "protein_coding"; transcript_source "ena"; transcript_biotype "protein_coding";
1	ena	gene	175940	177178	.	-	.	gene_id "CNAG_00064"; gene_source "ena"; gene_biotype "protein_coding";
1	ena	transcript	175940	177178	.	-	.	gene_id "CNAG_00064"; transcript_id "AFR92202"; gene_source "ena"; gene_biotype "protein_coding"; transcript_source "ena"; transcript_biotype "protein_coding";
1	ena	exon	176904	177178	.	-	.	gene_id "CNAG_00064"; transcript_id "AFR92202"; exon_number "1"; gene_source "ena"; gene_biotype "protein_coding"; transcript_source "ena"; transcript_biotype "protein_coding"; exon_id "AFR92202-1";
1	ena	CDS	176904	177035	.	-	0	gene_id "CNAG_00064"; transcript_id "AFR92202"; exon_number "1"; gene_source "ena"; gene_biotype "protein_coding"; transcript_source "ena"; transcript_biotype "protein_coding"; protein_id "AFR92202"; protein_version "1";
1	ena	start_codon	177033	177035	.	-	0	gene_id "CNAG_00064"; transcript_id "AFR92202"; exon_number "1"; gene_source "ena"; gene_biotype "protein_coding"; transcript_source "ena"; transcript_biotype "protein_coding";
1	ena	exon	176764	176817	.	-	.	gene_id "CNAG_00064"; transcript_id "AFR92202"; exon_number "2"; gene_source "ena"; gene_biotype "protein_coding"; transcript_source "ena"; transcript_biotype "protein_coding"; exon_id "AFR92202-2";
1	ena	CDS	176764	176817	.	-	0	gene_id "CNAG_00064"; transcript_id "AFR92202"; exon_number "2"; gene_source "ena"; gene_biotype "protein_coding"; transcript_source "ena"; transcript_biotype "protein_coding"; protein_id "AFR92202"; protein_version "1";
1	ena	exon	176525	176664	.	-	.	gene_id "CNAG_00064"; transcript_id "AFR92202"; exon_number "3"; gene_source "ena"; gene_biotype "protein_coding"; transcript_source "ena"; transcript_biotype "protein_coding"; exon_id "AFR92202-3";
1	ena	CDS	176525	176664	.	-	0	gene_id "CNAG_00064"; transcript_id "AFR92202"; exon_number "3"; gene_source "ena"; gene_biotype "protein_coding"; transcript_source "ena"; transcript_biotype "protein_coding"; protein_id "AFR92202"; protein_version "1";
1	ena	exon	176281	176426	.	-	.	gene_id "CNAG_00064"; transcript_id "AFR92202"; exon_number "4"; gene_source "ena"; gene_biotype "protein_coding"; transcript_source "ena"; transcript_biotype "protein_coding"; exon_id "AFR92202-4";
1	ena	CDS	176281	176426	.	-	1	gene_id "CNAG_00064"; transcript_id "AFR92202"; exon_number "4"; gene_source "ena"; gene_biotype "protein_coding"; transcript_source "ena"; transcript_biotype "protein_coding"; protein_id "AFR92202"; protein_version "1";
1	ena	exon	175940	176167	.	-	.	gene_id "CNAG_00064"; transcript_id "AFR92202"; exon_number "5"; gene_source "ena"; gene_biotype "protein_coding"; transcript_source "ena"; transcript_biotype "protein_coding"; exon_id "AFR92202-5";
1	ena	CDS	176043	176167	.	-	2	gene_id "CNAG_00064"; transcript_id "AFR92202"; exon_number "5"; gene_source "ena"; gene_biotype "protein_coding"; transcript_source "ena"; transcript_biotype "protein_coding"; protein_id "AFR92202"; protein_version "1";
1	ena	five_prime_utr	177036	177178	.	-	.	gene_id "CNAG_00064"; transcript_id "AFR92202"; gene_source "ena"; gene_biotype "protein_coding"; transcript_source "ena"; transcript_biotype "protein_coding";
1	ena	three_prime_utr	175940	176042	.	-	.	gene_id "CNAG_00064"; transcript_id "AFR92202"; gene_source "ena"; gene_biotype "protein_coding"; transcript_source "ena"; transcript_biotype "protein_coding";
1	ena	gene	177266	179242	.	+	.	gene_id "CNAG_00065"; gene_source "ena"; gene_biotype "protein_coding";
1	ena	transcript	177266	179242	.	+	.	gene_id "CNAG_00065"; transcript_id "AFR92203"; gene_source "ena"; gene_biotype "protein_coding"; transcript_source "ena"; transcript_biotype "protein_coding";
1	ena	exon	177266	177559	.	+	.	gene_id "CNAG_00065"; transcript_id "AFR92203"; exon_number "1"; gene_source "ena"; gene_biotype "protein_coding"; transcript_source "ena"; transcript_biotype "protein_coding"; exon_id "AFR92203-1";
1	ena	CDS	177527	177559	.	+	0	gene_id "CNAG_00065"; transcript_id "AFR92203"; exon_number "1"; gene_source "ena"; gene_biotype "protein_coding"; transcript_source "ena"; transcript_biotype "protein_coding"; protein_id "AFR92203"; protein_version "1";
1	ena	start_codon	177527	177529	.	+	0	gene_id "CNAG_00065"; transcript_id "AFR92203"; exon_number "1"; gene_source "ena"; gene_biotype "protein_coding"; transcript_source "ena"; transcript_biotype "protein_coding";
1	ena	exon	177747	177841	.	+	.	gene_id "CNAG_00065"; transcript_id "AFR92203"; exon_number "2"; gene_source "ena"; gene_biotype "protein_coding"; transcript_source "ena"; transcript_biotype "protein_coding"; exon_id "AFR92203-2";
1	ena	CDS	177747	177841	.	+	0	gene_id "CNAG_00065"; transcript_id "AFR92203"; exon_number "2"; gene_source "ena"; gene_biotype "protein_coding"; transcript_source "ena"; transcript_biotype "protein_coding"; protein_id "AFR92203"; protein_version "1";
1	ena	exon	177976	178127	.	+	.	gene_id "CNAG_00065"; transcript_id "AFR92203"; exon_number "3"; gene_source "ena"; gene_biotype "protein_coding"; transcript_source "ena"; transcript_biotype "protein_coding"; exon_id "AFR92203-3";
1	ena	CDS	177976	178127	.	+	1	gene_id "CNAG_00065"; transcript_id "AFR92203"; exon_number "3"; gene_source "ena"; gene_biotype "protein_coding"; transcript_source "ena"; transcript_biotype "protein_coding"; protein_id "AFR92203"; protein_version "1";
1	ena	exon	178205	178333	.	+	.	gene_id "CNAG_00065"; transcript_id "AFR92203"; exon_number "4"; gene_source "ena"; gene_biotype "protein_coding"; transcript_source "ena"; transcript_biotype "protein_coding"; exon_id "AFR92203-4";
1	ena	CDS	178205	178333	.	+	2	gene_id "CNAG_00065"; transcript_id "AFR92203"; exon_number "4"; gene_source "ena"; gene_biotype "protein_coding"; transcript_source "ena"; transcript_biotype "protein_coding"; protein_id "AFR92203"; protein_version "1";
1	ena	exon	178425	178543	.	+	.	gene_id "CNAG_00065"; transcript_id "AFR92203"; exon_number "5"; gene_source "ena"; gene_biotype "protein_coding"; transcript_source "ena"; transcript_biotype "protein_coding"; exon_id "AFR92203-5";
1	ena	CDS	178425	178543	.	+	2	gene_id "CNAG_00065"; transcript_id "AFR92203"; exon_number "5"; gene_source "ena"; gene_biotype "protein_coding"; transcript_source "ena"; transcript_biotype "protein_coding"; protein_id "AFR92203"; protein_version "1";
1	ena	exon	178657	179242	.	+	.	gene_id "CNAG_00065"; transcript_id "AFR92203"; exon_number "6"; gene_source "ena"; gene_biotype "protein_coding"; transcript_source "ena"; transcript_biotype "protein_coding"; exon_id "AFR92203-6";
1	ena	CDS	178657	178845	.	+	0	gene_id "CNAG_00065"; transcript_id "AFR92203"; exon_number "6"; gene_source "ena"; gene_biotype "protein_coding"; transcript_source "ena"; transcript_biotype "protein_coding"; protein_id "AFR92203"; protein_version "1";
1	ena	five_prime_utr	177266	177526	.	+	.	gene_id "CNAG_00065"; transcript_id "AFR92203"; gene_source "ena"; gene_biotype "protein_coding"; transcript_source "ena"; transcript_biotype "protein_coding";
1	ena	three_prime_utr	178846	179242	.	+	.	gene_id "CNAG_00065"; transcript_id "AFR92203"; gene_source "ena"; gene_biotype "protein_coding"; transcript_source "ena"; transcript_biotype "protein_coding";
1	ena	gene	178748	183622	.	-	.	gene_id "CNAG_00066"; gene_source "ena"; gene_biotype "protein_coding";
1	ena	transcript	178748	183622	.	-	.	gene_id "CNAG_00066"; transcript_id "AFR92204"; gene_source "ena"; gene_biotype "protein_coding"; transcript_source "ena"; transcript_biotype "protein_coding";
1	ena	exon	182537	183622	.	-	.	gene_id "CNAG_00066"; transcript_id "AFR92204"; exon_number "1"; gene_source "ena"; gene_biotype "protein_coding"; transcript_source "ena"; transcript_biotype "protein_coding"; exon_id "AFR92204-1";
1	ena	CDS	182537	183359	.	-	0	gene_id "CNAG_00066"; transcript_id "AFR92204"; exon_number "1"; gene_source "ena"; gene_biotype "protein_coding"; transcript_source "ena"; transcript_biotype "protein_coding"; protein_id "AFR92204"; protein_version "1";
1	ena	start_codon	183357	183359	.	-	0	gene_id "CNAG_00066"; transcript_id "AFR92204"; exon_number "1"; gene_source "ena"; gene_biotype "protein_coding"; transcript_source "ena"; transcript_biotype "protein_coding";
1	ena	exon	181316	182496	.	-	.	gene_id "CNAG_00066"; transcript_id "AFR92204"; exon_number "2"; gene_source "ena"; gene_biotype "protein_coding"; transcript_source "ena"; transcript_biotype "protein_coding"; exon_id "AFR92204-2";
1	ena	CDS	181316	182496	.	-	2	gene_id "CNAG_00066"; transcript_id "AFR92204"; exon_number "2"; gene_source "ena"; gene_biotype "protein_coding"; transcript_source "ena"; transcript_biotype "protein_coding"; protein_id "AFR92204"; protein_version "1";
1	ena	exon	178748	181264	.	-	.	gene_id "CNAG_00066"; transcript_id "AFR92204"; exon_number "3"; gene_source "ena"; gene_biotype "protein_coding"; transcript_source "ena"; transcript_biotype "protein_coding"; exon_id "AFR92204-3";
1	ena	CDS	179417	181264	.	-	0	gene_id "CNAG_00066"; transcript_id "AFR92204"; exon_number "3"; gene_source "ena"; gene_biotype "protein_coding"; transcript_source "ena"; transcript_biotype "protein_coding"; protein_id "AFR92204"; protein_version "1";
1	ena	stop_codon	179414	179416	.	-	0	gene_id "CNAG_00066"; transcript_id "AFR92204"; exon_number "3"; gene_source "ena"; gene_biotype "protein_coding"; transcript_source "ena"; transcript_biotype "protein_coding";
1	ena	five_prime_utr	183360	183622	.	-	.	gene_id "CNAG_00066"; transcript_id "AFR92204"; gene_source "ena"; gene_biotype "protein_coding"; transcript_source "ena"; transcript_biotype "protein_coding";
1	ena	three_prime_utr	178748	179413	.	-	.	gene_id "CNAG_00066"; transcript_id "AFR92204"; gene_source "ena"; gene_biotype "protein_coding"; transcript_source "ena"; transcript_biotype "protein_coding";
1	ena	gene	183994	186412	.	+	.	gene_id "CNAG_00067"; gene_source "ena"; gene_biotype "protein_coding";
1	ena	transcript	183994	186412	.	+	.	gene_id "CNAG_00067"; transcript_id "AFR92205"; gene_source "ena"; gene_biotype "protein_coding"; transcript_source "ena"; transcript_biotype "protein_coding";
1	ena	exon	183994	184187	.	+	.	gene_id "CNAG_00067"; transcript_id "AFR92205"; exon_number "1"; gene_source "ena"; gene_biotype "protein_coding"; transcript_source "ena"; transcript_biotype "protein_coding"; exon_id "AFR92205-1";
1	ena	CDS	184125	184187	.	+	0	gene_id "CNAG_00067"; transcript_id "AFR92205"; exon_number "1"; gene_source "ena"; gene_biotype "protein_coding"; transcript_source "ena"; transcript_biotype "protein_coding"; protein_id "AFR92205"; protein_version "1";
1	ena	start_codon	184125	184127	.	+	0	gene_id "CNAG_00067"; transcript_id "AFR92205"; exon_number "1"; gene_source "ena"; gene_biotype "protein_coding"; transcript_source "ena"; transcript_biotype "protein_coding";
1	ena	exon	184314	184347	.	+	.	gene_id "CNAG_00067"; transcript_id "AFR92205"; exon_number "2"; gene_source "ena"; gene_biotype "protein_coding"; transcript_source "ena"; transcript_biotype "protein_coding"; exon_id "AFR92205-2";
1	ena	CDS	184314	184347	.	+	0	gene_id "CNAG_00067"; transcript_id "AFR92205"; exon_number "2"; gene_source "ena"; gene_biotype "protein_coding"; transcript_source "ena"; transcript_biotype "protein_coding"; protein_id "AFR92205"; protein_version "1";
1	ena	exon	184590	184677	.	+	.	gene_id "CNAG_00067"; transcript_id "AFR92205"; exon_number "3"; gene_source "ena"; gene_biotype "protein_coding"; transcript_source "ena"; transcript_biotype "protein_coding"; exon_id "AFR92205-3";
1	ena	CDS	184590	184677	.	+	2	gene_id "CNAG_00067"; transcript_id "AFR92205"; exon_number "3"; gene_source "ena"; gene_biotype "protein_coding"; transcript_source "ena"; transcript_biotype "protein_coding"; protein_id "AFR92205"; protein_version "1";
1	ena	exon	184748	184762	.	+	.	gene_id "CNAG_00067"; transcript_id "AFR92205"; exon_number "4"; gene_source "ena"; gene_biotype "protein_coding"; transcript_source "ena"; transcript_biotype "protein_coding"; exon_id "AFR92205-4";
1	ena	CDS	184748	184762	.	+	1	gene_id "CNAG_00067"; transcript_id "AFR92205"; exon_number "4"; gene_source "ena"; gene_biotype "protein_coding"; transcript_source "ena"; transcript_biotype "protein_coding"; protein_id "AFR92205"; protein_version "1";
1	ena	exon	184920	186412	.	+	.	gene_id "CNAG_00067"; transcript_id "AFR92205"; exon_number "5"; gene_source "ena"; gene_biotype "protein_coding"; transcript_source "ena"; transcript_biotype "protein_coding"; exon_id "AFR92205-5";
1	ena	CDS	184920	184932	.	+	1	gene_id "CNAG_00067"; transcript_id "AFR92205"; exon_number "5"; gene_source "ena"; gene_biotype "protein_coding"; transcript_source "ena"; transcript_biotype "protein_coding"; protein_id "AFR92205"; protein_version "1";
1	ena	five_prime_utr	183994	184124	.	+	.	gene_id "CNAG_00067"; transcript_id "AFR92205"; gene_source "ena"; gene_biotype "protein_coding"; transcript_source "ena"; transcript_biotype "protein_coding";
1	ena	three_prime_utr	184933	186412	.	+	.	gene_id "CNAG_00067"; transcript_id "AFR92205"; gene_source "ena"; gene_biotype "protein_coding"; transcript_source "ena"; transcript_biotype "protein_coding";
1	ena	gene	186690	187366	.	-	.	gene_id "CNAG_12009"; gene_name "CNAG_12009"; gene_source "ena"; gene_biotype "ncRNA";
1	ena	transcript	186690	187366	.	-	.	gene_id "CNAG_12009"; transcript_id "CNAG_12009-1"; gene_name "CNAG_12009"; gene_source "ena"; gene_biotype "ncRNA"; transcript_name "CNAG_12009"; transcript_source "ena"; transcript_biotype "ncRNA";
1	ena	exon	186690	187366	.	-	.	gene_id "CNAG_12009"; transcript_id "CNAG_12009-1"; exon_number "1"; gene_name "CNAG_12009"; gene_source "ena"; gene_biotype "ncRNA"; transcript_name "CNAG_12009"; transcript_source "ena"; transcript_biotype "ncRNA"; exon_id "CNAG_12009-1-1";
1	ena	gene	187109	187735	.	+	.	gene_id "CNAG_12010"; gene_name "CNAG_12010"; gene_source "ena"; gene_biotype "ncRNA";
1	ena	transcript	187109	187735	.	+	.	gene_id "CNAG_12010"; transcript_id "CNAG_12010-1"; gene_name "CNAG_12010"; gene_source "ena"; gene_biotype "ncRNA"; transcript_name "CNAG_12010"; transcript_source "ena"; transcript_biotype "ncRNA";
1	ena	exon	187109	187397	.	+	.	gene_id "CNAG_12010"; transcript_id "CNAG_12010-1"; exon_number "1"; gene_name "CNAG_12010"; gene_source "ena"; gene_biotype "ncRNA"; transcript_name "CNAG_12010"; transcript_source "ena"; transcript_biotype "ncRNA"; exon_id "CNAG_12010-1-1";
1	ena	exon	187489	187735	.	+	.	gene_id "CNAG_12010"; transcript_id "CNAG_12010-1"; exon_number "2"; gene_name "CNAG_12010"; gene_source "ena"; gene_biotype "ncRNA"; transcript_name "CNAG_12010"; transcript_source "ena"; transcript_biotype "ncRNA"; exon_id "CNAG_12010-1-2";
1	ena	gene	187691	188490	.	-	.	gene_id "CNAG_12011"; gene_name "CNAG_12011"; gene_source "ena"; gene_biotype "ncRNA";
1	ena	transcript	187691	188490	.	-	.	gene_id "CNAG_12011"; transcript_id "CNAG_12011-1"; gene_name "CNAG_12011"; gene_source "ena"; gene_biotype "ncRNA"; transcript_name "CNAG_12011"; transcript_source "ena"; transcript_biotype "ncRNA";
1	ena	exon	187691	188490	.	-	.	gene_id "CNAG_12011"; transcript_id "CNAG_12011-1"; exon_number "1"; gene_name "CNAG_12011"; gene_source "ena"; gene_biotype "ncRNA"; transcript_name "CNAG_12011"; transcript_source "ena"; transcript_biotype "ncRNA"; exon_id "CNAG_12011-1-1";
1	ena	gene	187780	188217	.	+	.	gene_id "CNAG_12012"; gene_name "CNAG_12012"; gene_source "ena"; gene_biotype "ncRNA";
1	ena	transcript	187780	188217	.	+	.	gene_id "CNAG_12012"; transcript_id "CNAG_12012-1"; gene_name "CNAG_12012"; gene_source "ena"; gene_biotype "ncRNA"; transcript_name "CNAG_12012"; transcript_source "ena"; transcript_biotype "ncRNA";
1	ena	exon	187780	188007	.	+	.	gene_id "CNAG_12012"; transcript_id "CNAG_12012-1"; exon_number "1"; gene_name "CNAG_12012"; gene_source "ena"; gene_biotype "ncRNA"; transcript_name "CNAG_12012"; transcript_source "ena"; transcript_biotype "ncRNA"; exon_id "CNAG_12012-1-1";
1	ena	exon	188051	188217	.	+	.	gene_id "CNAG_12012"; transcript_id "CNAG_12012-1"; exon_number "2"; gene_name "CNAG_12012"; gene_source "ena"; gene_biotype "ncRNA"; transcript_name "CNAG_12012"; transcript_source "ena"; transcript_biotype "ncRNA"; exon_id "CNAG_12012-1-2";
1	ena	gene	188641	192558	.	+	.	gene_id "CNAG_00068"; gene_source "ena"; gene_biotype "protein_coding";
1	ena	transcript	188641	192558	.	+	.	gene_id "CNAG_00068"; transcript_id "AFR92206"; gene_source "ena"; gene_biotype "protein_coding"; transcript_source "ena"; transcript_biotype "protein_coding";
1	ena	exon	188641	189606	.	+	.	gene_id "CNAG_00068"; transcript_id "AFR92206"; exon_number "1"; gene_source "ena"; gene_biotype "protein_coding"; transcript_source "ena"; transcript_biotype "protein_coding"; exon_id "AFR92206-1";
1	ena	CDS	189541	189606	.	+	0	gene_id "CNAG_00068"; transcript_id "AFR92206"; exon_number "1"; gene_source "ena"; gene_biotype "protein_coding"; transcript_source "ena"; transcript_biotype "protein_coding"; protein_id "AFR92206"; protein_version "1";
1	ena	start_codon	189541	189543	.	+	0	gene_id "CNAG_00068"; transcript_id "AFR92206"; exon_number "1"; gene_source "ena"; gene_biotype "protein_coding"; transcript_source "ena"; transcript_biotype "protein_coding";
1	ena	exon	190162	190923	.	+	.	gene_id "CNAG_00068"; transcript_id "AFR92206"; exon_number "2"; gene_source "ena"; gene_biotype "protein_coding"; transcript_source "ena"; transcript_biotype "protein_coding"; exon_id "AFR92206-2";
1	ena	CDS	190162	190923	.	+	0	gene_id "CNAG_00068"; transcript_id "AFR92206"; exon_number "2"; gene_source "ena"; gene_biotype "protein_coding"; transcript_source "ena"; transcript_biotype "protein_coding"; protein_id "AFR92206"; protein_version "1";
1	ena	exon	190983	191142	.	+	.	gene_id "CNAG_00068"; transcript_id "AFR92206"; exon_number "3"; gene_source "ena"; gene_biotype "protein_coding"; transcript_source "ena"; transcript_biotype "protein_coding"; exon_id "AFR92206-3";
1	ena	CDS	190983	191142	.	+	0	gene_id "CNAG_00068"; transcript_id "AFR92206"; exon_number "3"; gene_source "ena"; gene_biotype "protein_coding"; transcript_source "ena"; transcript_biotype "protein_coding"; protein_id "AFR92206"; protein_version "1";
1	ena	exon	191197	191917	.	+	.	gene_id "CNAG_00068"; transcript_id "AFR92206"; exon_number "4"; gene_source "ena"; gene_biotype "protein_coding"; transcript_source "ena"; transcript_biotype "protein_coding"; exon_id "AFR92206-4";
1	ena	CDS	191197	191917	.	+	2	gene_id "CNAG_00068"; transcript_id "AFR92206"; exon_number "4"; gene_source "ena"; gene_biotype "protein_coding"; transcript_source "ena"; transcript_biotype "protein_coding"; protein_id "AFR92206"; protein_version "1";
1	ena	exon	191977	192558	.	+	.	gene_id "CNAG_00068"; transcript_id "AFR92206"; exon_number "5"; gene_source "ena"; gene_biotype "protein_coding"; transcript_source "ena"; transcript_biotype "protein_coding"; exon_id "AFR92206-5";
1	ena	CDS	191977	192076	.	+	1	gene_id "CNAG_00068"; transcript_id "AFR92206"; exon_number "5"; gene_source "ena"; gene_biotype "protein_coding"; transcript_source "ena"; transcript_biotype "protein_coding"; protein_id "AFR92206"; protein_version "1";
1	ena	five_prime_utr	188641	189540	.	+	.	gene_id "CNAG_00068"; transcript_id "AFR92206"; gene_source "ena"; gene_biotype "protein_coding"; transcript_source "ena"; transcript_biotype "protein_coding";
1	ena	three_prime_utr	192077	192558	.	+	.	gene_id "CNAG_00068"; transcript_id "AFR92206"; gene_source "ena"; gene_biotype "protein_coding"; transcript_source "ena"; transcript_biotype "protein_coding";
1	ena	gene	192615	194338	.	-	.	gene_id "CNAG_12013"; gene_name "CNAG_12013"; gene_source "ena"; gene_biotype "ncRNA";
1	ena	transcript	192615	194338	.	-	.	gene_id "CNAG_12013"; transcript_id "CNAG_12013-1"; gene_name "CNAG_12013"; gene_source "ena"; gene_biotype "ncRNA"; transcript_name "CNAG_12013"; transcript_source "ena"; transcript_biotype "ncRNA";
1	ena	exon	192615	194338	.	-	.	gene_id "CNAG_12013"; transcript_id "CNAG_12013-1"; exon_number "1"; gene_name "CNAG_12013"; gene_source "ena"; gene_biotype "ncRNA"; transcript_name "CNAG_12013"; transcript_source "ena"; transcript_biotype "ncRNA"; exon_id "CNAG_12013-1-1";
1	ena	gene	192685	193944	.	+	.	gene_id "CNAG_00069"; gene_source "ena"; gene_biotype "protein_coding";
1	ena	transcript	192685	193944	.	+	.	gene_id "CNAG_00069"; transcript_id "AFR92207"; gene_source "ena"; gene_biotype "protein_coding"; transcript_source "ena"; transcript_biotype "protein_coding";
1	ena	exon	192685	193944	.	+	.	gene_id "CNAG_00069"; transcript_id "AFR92207"; exon_number "1"; gene_source "ena"; gene_biotype "protein_coding"; transcript_source "ena"; transcript_biotype "protein_coding"; exon_id "AFR92207-1";
1	ena	CDS	192776	193729	.	+	0	gene_id "CNAG_00069"; transcript_id "AFR92207"; exon_number "1"; gene_source "ena"; gene_biotype "protein_coding"; transcript_source "ena"; transcript_biotype "protein_coding"; protein_id "AFR92207"; protein_version "1";
1	ena	start_codon	192776	192778	.	+	0	gene_id "CNAG_00069"; transcript_id "AFR92207"; exon_number "1"; gene_source "ena"; gene_biotype "protein_coding"; transcript_source "ena"; transcript_biotype "protein_coding";
1	ena	five_prime_utr	192685	192775	.	+	.	gene_id "CNAG_00069"; transcript_id "AFR92207"; gene_source "ena"; gene_biotype "protein_coding"; transcript_source "ena"; transcript_biotype "protein_coding";
1	ena	three_prime_utr	193730	193944	.	+	.	gene_id "CNAG_00069"; transcript_id "AFR92207"; gene_source "ena"; gene_biotype "protein_coding"; transcript_source "ena"; transcript_biotype "protein_coding";
1	ena	gene	194625	197662	.	+	.	gene_id "CNAG_00070"; gene_source "ena"; gene_biotype "protein_coding";
1	ena	transcript	194625	197662	.	+	.	gene_id "CNAG_00070"; transcript_id "AFR92208"; gene_source "ena"; gene_biotype "protein_coding"; transcript_source "ena"; transcript_biotype "protein_coding";
1	ena	exon	194625	195921	.	+	.	gene_id "CNAG_00070"; transcript_id "AFR92208"; exon_number "1"; gene_source "ena"; gene_biotype "protein_coding"; transcript_source "ena"; transcript_biotype "protein_coding"; exon_id "AFR92208-1";
1	ena	CDS	195355	195921	.	+	0	gene_id "CNAG_00070"; transcript_id "AFR92208"; exon_number "1"; gene_source "ena"; gene_biotype "protein_coding"; transcript_source "ena"; transcript_biotype "protein_coding"; protein_id "AFR92208"; protein_version "1";
1	ena	start_codon	195355	195357	.	+	0	gene_id "CNAG_00070"; transcript_id "AFR92208"; exon_number "1"; gene_source "ena"; gene_biotype "protein_coding"; transcript_source "ena"; transcript_biotype "protein_coding";
1	ena	exon	195987	196440	.	+	.	gene_id "CNAG_00070"; transcript_id "AFR92208"; exon_number "2"; gene_source "ena"; gene_biotype "protein_coding"; transcript_source "ena"; transcript_biotype "protein_coding"; exon_id "AFR92208-2";
1	ena	CDS	195987	196440	.	+	0	gene_id "CNAG_00070"; transcript_id "AFR92208"; exon_number "2"; gene_source "ena"; gene_biotype "protein_coding"; transcript_source "ena"; transcript_biotype "protein_coding"; protein_id "AFR92208"; protein_version "1";
1	ena	exon	196496	197662	.	+	.	gene_id "CNAG_00070"; transcript_id "AFR92208"; exon_number "3"; gene_source "ena"; gene_biotype "protein_coding"; transcript_source "ena"; transcript_biotype "protein_coding"; exon_id "AFR92208-3";
1	ena	CDS	196496	197337	.	+	2	gene_id "CNAG_00070"; transcript_id "AFR92208"; exon_number "3"; gene_source "ena"; gene_biotype "protein_coding"; transcript_source "ena"; transcript_biotype "protein_coding"; protein_id "AFR92208"; protein_version "1";
1	ena	five_prime_utr	194625	195354	.	+	.	gene_id "CNAG_00070"; transcript_id "AFR92208"; gene_source "ena"; gene_biotype "protein_coding"; transcript_source "ena"; transcript_biotype "protein_coding";
1	ena	three_prime_utr	197338	197662	.	+	.	gene_id "CNAG_00070"; transcript_id "AFR92208"; gene_source "ena"; gene_biotype "protein_coding"; transcript_source "ena"; transcript_biotype "protein_coding";
1	ena	gene	199185	201197	.	+	.	gene_id "CNAG_00072"; gene_source "ena"; gene_biotype "protein_coding";
1	ena	transcript	199185	201197	.	+	.	gene_id "CNAG_00072"; transcript_id "AFR92209"; gene_source "ena"; gene_biotype "protein_coding"; transcript_source "ena"; transcript_biotype "protein_coding";
1	ena	exon	199185	199336	.	+	.	gene_id "CNAG_00072"; transcript_id "AFR92209"; exon_number "1"; gene_source "ena"; gene_biotype "protein_coding"; transcript_source "ena"; transcript_biotype "protein_coding"; exon_id "AFR92209-1";
1	ena	CDS	199238	199336	.	+	0	gene_id "CNAG_00072"; transcript_id "AFR92209"; exon_number "1"; gene_source "ena"; gene_biotype "protein_coding"; transcript_source "ena"; transcript_biotype "protein_coding"; protein_id "AFR92209"; protein_version "1";
1	ena	start_codon	199238	199240	.	+	0	gene_id "CNAG_00072"; transcript_id "AFR92209"; exon_number "1"; gene_source "ena"; gene_biotype "protein_coding"; transcript_source "ena"; transcript_biotype "protein_coding";
1	ena	exon	199399	199433	.	+	.	gene_id "CNAG_00072"; transcript_id "AFR92209"; exon_number "2"; gene_source "ena"; gene_biotype "protein_coding"; transcript_source "ena"; transcript_biotype "protein_coding"; exon_id "AFR92209-2";
1	ena	CDS	199399	199433	.	+	0	gene_id "CNAG_00072"; transcript_id "AFR92209"; exon_number "2"; gene_source "ena"; gene_biotype "protein_coding"; transcript_source "ena"; transcript_biotype "protein_coding"; protein_id "AFR92209"; protein_version "1";
1	ena	exon	199490	199498	.	+	.	gene_id "CNAG_00072"; transcript_id "AFR92209"; exon_number "3"; gene_source "ena"; gene_biotype "protein_coding"; transcript_source "ena"; transcript_biotype "protein_coding"; exon_id "AFR92209-3";
1	ena	CDS	199490	199498	.	+	1	gene_id "CNAG_00072"; transcript_id "AFR92209"; exon_number "3"; gene_source "ena"; gene_biotype "protein_coding"; transcript_source "ena"; transcript_biotype "protein_coding"; protein_id "AFR92209"; protein_version "1";
1	ena	exon	199570	199592	.	+	.	gene_id "CNAG_00072"; transcript_id "AFR92209"; exon_number "4"; gene_source "ena"; gene_biotype "protein_coding"; transcript_source "ena"; transcript_biotype "protein_coding"; exon_id "AFR92209-4";
1	ena	CDS	199570	199592	.	+	1	gene_id "CNAG_00072"; transcript_id "AFR92209"; exon_number "4"; gene_source "ena"; gene_biotype "protein_coding"; transcript_source "ena"; transcript_biotype "protein_coding"; protein_id "AFR92209"; protein_version "1";
1	ena	exon	199648	199688	.	+	.	gene_id "CNAG_00072"; transcript_id "AFR92209"; exon_number "5"; gene_source "ena"; gene_biotype "protein_coding"; transcript_source "ena"; transcript_biotype "protein_coding"; exon_id "AFR92209-5";
1	ena	CDS	199648	199688	.	+	2	gene_id "CNAG_00072"; transcript_id "AFR92209"; exon_number "5"; gene_source "ena"; gene_biotype "protein_coding"; transcript_source "ena"; transcript_biotype "protein_coding"; protein_id "AFR92209"; protein_version "1";
1	ena	exon	199746	199827	.	+	.	gene_id "CNAG_00072"; transcript_id "AFR92209"; exon_number "6"; gene_source "ena"; gene_biotype "protein_coding"; transcript_source "ena"; transcript_biotype "protein_coding"; exon_id "AFR92209-6";
1	ena	CDS	199746	199827	.	+	0	gene_id "CNAG_00072"; transcript_id "AFR92209"; exon_number "6"; gene_source "ena"; gene_biotype "protein_coding"; transcript_source "ena"; transcript_biotype "protein_coding"; protein_id "AFR92209"; protein_version "1";
1	ena	exon	199880	199958	.	+	.	gene_id "CNAG_00072"; transcript_id "AFR92209"; exon_number "7"; gene_source "ena"; gene_biotype "protein_coding"; transcript_source "ena"; transcript_biotype "protein_coding"; exon_id "AFR92209-7";
1	ena	CDS	199880	199958	.	+	2	gene_id "CNAG_00072"; transcript_id "AFR92209"; exon_number "7"; gene_source "ena"; gene_biotype "protein_coding"; transcript_source "ena"; transcript_biotype "protein_coding"; protein_id "AFR92209"; protein_version "1";
1	ena	exon	200019	200157	.	+	.	gene_id "CNAG_00072"; transcript_id "AFR92209"; exon_number "8"; gene_source "ena"; gene_biotype "protein_coding"; transcript_source "ena"; transcript_biotype "protein_coding"; exon_id "AFR92209-8";
1	ena	CDS	200019	200157	.	+	1	gene_id "CNAG_00072"; transcript_id "AFR92209"; exon_number "8"; gene_source "ena"; gene_biotype "protein_coding"; transcript_source "ena"; transcript_biotype "protein_coding"; protein_id "AFR92209"; protein_version "1";
1	ena	exon	200231	200455	.	+	.	gene_id "CNAG_00072"; transcript_id "AFR92209"; exon_number "9"; gene_source "ena"; gene_biotype "protein_coding"; transcript_source "ena"; transcript_biotype "protein_coding"; exon_id "AFR92209-9";
1	ena	CDS	200231	200455	.	+	0	gene_id "CNAG_00072"; transcript_id "AFR92209"; exon_number "9"; gene_source "ena"; gene_biotype "protein_coding"; transcript_source "ena"; transcript_biotype "protein_coding"; protein_id "AFR92209"; protein_version "1";
1	ena	exon	200533	200792	.	+	.	gene_id "CNAG_00072"; transcript_id "AFR92209"; exon_number "10"; gene_source "ena"; gene_biotype "protein_coding"; transcript_source "ena"; transcript_biotype "protein_coding"; exon_id "AFR92209-10";
1	ena	CDS	200533	200792	.	+	0	gene_id "CNAG_00072"; transcript_id "AFR92209"; exon_number "10"; gene_source "ena"; gene_biotype "protein_coding"; transcript_source "ena"; transcript_biotype "protein_coding"; protein_id "AFR92209"; protein_version "1";
1	ena	exon	200864	201197	.	+	.	gene_id "CNAG_00072"; transcript_id "AFR92209"; exon_number "11"; gene_source "ena"; gene_biotype "protein_coding"; transcript_source "ena"; transcript_biotype "protein_coding"; exon_id "AFR92209-11";
1	ena	CDS	200864	201104	.	+	1	gene_id "CNAG_00072"; transcript_id "AFR92209"; exon_number "11"; gene_source "ena"; gene_biotype "protein_coding"; transcript_source "ena"; transcript_biotype "protein_coding"; protein_id "AFR92209"; protein_version "1";
1	ena	stop_codon	201105	201107	.	+	0	gene_id "CNAG_00072"; transcript_id "AFR92209"; exon_number "11"; gene_source "ena"; gene_biotype "protein_coding"; transcript_source "ena"; transcript_biotype "protein_coding";
1	ena	five_prime_utr	199185	199237	.	+	.	gene_id "CNAG_00072"; transcript_id "AFR92209"; gene_source "ena"; gene_biotype "protein_coding"; transcript_source "ena"; transcript_biotype "protein_coding";
1	ena	three_prime_utr	201108	201197	.	+	.	gene_id "CNAG_00072"; transcript_id "AFR92209"; gene_source "ena"; gene_biotype "protein_coding"; transcript_source "ena"; transcript_biotype "protein_coding";
1	ena	gene	201141	205190	.	-	.	gene_id "CNAG_00073"; gene_source "ena"; gene_biotype "protein_coding";
1	ena	transcript	201141	205190	.	-	.	gene_id "CNAG_00073"; transcript_id "AFR92210"; gene_source "ena"; gene_biotype "protein_coding"; transcript_source "ena"; transcript_biotype "protein_coding";
1	ena	exon	204109	205190	.	-	.	gene_id "CNAG_00073"; transcript_id "AFR92210"; exon_number "1"; gene_source "ena"; gene_biotype "protein_coding"; transcript_source "ena"; transcript_biotype "protein_coding"; exon_id "AFR92210-1";
1	ena	CDS	204109	204477	.	-	0	gene_id "CNAG_00073"; transcript_id "AFR92210"; exon_number "1"; gene_source "ena"; gene_biotype "protein_coding"; transcript_source "ena"; transcript_biotype "protein_coding"; protein_id "AFR92210"; protein_version "1";
1	ena	start_codon	204475	204477	.	-	0	gene_id "CNAG_00073"; transcript_id "AFR92210"; exon_number "1"; gene_source "ena"; gene_biotype "protein_coding"; transcript_source "ena"; transcript_biotype "protein_coding";
1	ena	exon	203825	204059	.	-	.	gene_id "CNAG_00073"; transcript_id "AFR92210"; exon_number "2"; gene_source "ena"; gene_biotype "protein_coding"; transcript_source "ena"; transcript_biotype "protein_coding"; exon_id "AFR92210-2";
1	ena	CDS	203825	204059	.	-	0	gene_id "CNAG_00073"; transcript_id "AFR92210"; exon_number "2"; gene_source "ena"; gene_biotype "protein_coding"; transcript_source "ena"; transcript_biotype "protein_coding"; protein_id "AFR92210"; protein_version "1";
1	ena	exon	203609	203774	.	-	.	gene_id "CNAG_00073"; transcript_id "AFR92210"; exon_number "3"; gene_source "ena"; gene_biotype "protein_coding"; transcript_source "ena"; transcript_biotype "protein_coding"; exon_id "AFR92210-3";
1	ena	CDS	203609	203774	.	-	2	gene_id "CNAG_00073"; transcript_id "AFR92210"; exon_number "3"; gene_source "ena"; gene_biotype "protein_coding"; transcript_source "ena"; transcript_biotype "protein_coding"; protein_id "AFR92210"; protein_version "1";
1	ena	exon	202923	203556	.	-	.	gene_id "CNAG_00073"; transcript_id "AFR92210"; exon_number "4"; gene_source "ena"; gene_biotype "protein_coding"; transcript_source "ena"; transcript_biotype "protein_coding"; exon_id "AFR92210-4";
1	ena	CDS	202923	203556	.	-	1	gene_id "CNAG_00073"; transcript_id "AFR92210"; exon_number "4"; gene_source "ena"; gene_biotype "protein_coding"; transcript_source "ena"; transcript_biotype "protein_coding"; protein_id "AFR92210"; protein_version "1";
1	ena	exon	202599	202864	.	-	.	gene_id "CNAG_00073"; transcript_id "AFR92210"; exon_number "5"; gene_source "ena"; gene_biotype "protein_coding"; transcript_source "ena"; transcript_biotype "protein_coding"; exon_id "AFR92210-5";
1	ena	CDS	202599	202864	.	-	0	gene_id "CNAG_00073"; transcript_id "AFR92210"; exon_number "5"; gene_source "ena"; gene_biotype "protein_coding"; transcript_source "ena"; transcript_biotype "protein_coding"; protein_id "AFR92210"; protein_version "1";
1	ena	exon	201918	202546	.	-	.	gene_id "CNAG_00073"; transcript_id "AFR92210"; exon_number "6"; gene_source "ena"; gene_biotype "protein_coding"; transcript_source "ena"; transcript_biotype "protein_coding"; exon_id "AFR92210-6";
1	ena	CDS	201918	202546	.	-	1	gene_id "CNAG_00073"; transcript_id "AFR92210"; exon_number "6"; gene_source "ena"; gene_biotype "protein_coding"; transcript_source "ena"; transcript_biotype "protein_coding"; protein_id "AFR92210"; protein_version "1";
1	ena	exon	201141	201864	.	-	.	gene_id "CNAG_00073"; transcript_id "AFR92210"; exon_number "7"; gene_source "ena"; gene_biotype "protein_coding"; transcript_source "ena"; transcript_biotype "protein_coding"; exon_id "AFR92210-7";
1	ena	CDS	201593	201864	.	-	2	gene_id "CNAG_00073"; transcript_id "AFR92210"; exon_number "7"; gene_source "ena"; gene_biotype "protein_coding"; transcript_source "ena"; transcript_biotype "protein_coding"; protein_id "AFR92210"; protein_version "1";
1	ena	five_prime_utr	204478	205190	.	-	.	gene_id "CNAG_00073"; transcript_id "AFR92210"; gene_source "ena"; gene_biotype "protein_coding"; transcript_source "ena"; transcript_biotype "protein_coding";
1	ena	three_prime_utr	201141	201592	.	-	.	gene_id "CNAG_00073"; transcript_id "AFR92210"; gene_source "ena"; gene_biotype "protein_coding"; transcript_source "ena"; transcript_biotype "protein_coding";
1	ena	gene	205405	208337	.	+	.	gene_id "CNAG_00074"; gene_source "ena"; gene_biotype "protein_coding";
1	ena	transcript	205405	208337	.	+	.	gene_id "CNAG_00074"; transcript_id "AFR92211"; gene_source "ena"; gene_biotype "protein_coding"; transcript_source "ena"; transcript_biotype "protein_coding";
1	ena	exon	205405	206113	.	+	.	gene_id "CNAG_00074"; transcript_id "AFR92211"; exon_number "1"; gene_source "ena"; gene_biotype "protein_coding"; transcript_source "ena"; transcript_biotype "protein_coding"; exon_id "AFR92211-1";
1	ena	CDS	205680	206113	.	+	0	gene_id "CNAG_00074"; transcript_id "AFR92211"; exon_number "1"; gene_source "ena"; gene_biotype "protein_coding"; transcript_source "ena"; transcript_biotype "protein_coding"; protein_id "AFR92211"; protein_version "1";
1	ena	start_codon	205680	205682	.	+	0	gene_id "CNAG_00074"; transcript_id "AFR92211"; exon_number "1"; gene_source "ena"; gene_biotype "protein_coding"; transcript_source "ena"; transcript_biotype "protein_coding";
1	ena	exon	206169	206235	.	+	.	gene_id "CNAG_00074"; transcript_id "AFR92211"; exon_number "2"; gene_source "ena"; gene_biotype "protein_coding"; transcript_source "ena"; transcript_biotype "protein_coding"; exon_id "AFR92211-2";
1	ena	CDS	206169	206235	.	+	1	gene_id "CNAG_00074"; transcript_id "AFR92211"; exon_number "2"; gene_source "ena"; gene_biotype "protein_coding"; transcript_source "ena"; transcript_biotype "protein_coding"; protein_id "AFR92211"; protein_version "1";
1	ena	exon	206291	206369	.	+	.	gene_id "CNAG_00074"; transcript_id "AFR92211"; exon_number "3"; gene_source "ena"; gene_biotype "protein_coding"; transcript_source "ena"; transcript_biotype "protein_coding"; exon_id "AFR92211-3";
1	ena	CDS	206291	206369	.	+	0	gene_id "CNAG_00074"; transcript_id "AFR92211"; exon_number "3"; gene_source "ena"; gene_biotype "protein_coding"; transcript_source "ena"; transcript_biotype "protein_coding"; protein_id "AFR92211"; protein_version "1";
1	ena	exon	206429	206446	.	+	.	gene_id "CNAG_00074"; transcript_id "AFR92211"; exon_number "4"; gene_source "ena"; gene_biotype "protein_coding"; transcript_source "ena"; transcript_biotype "protein_coding"; exon_id "AFR92211-4";
1	ena	CDS	206429	206446	.	+	2	gene_id "CNAG_00074"; transcript_id "AFR92211"; exon_number "4"; gene_source "ena"; gene_biotype "protein_coding"; transcript_source "ena"; transcript_biotype "protein_coding"; protein_id "AFR92211"; protein_version "1";
1	ena	exon	206506	206578	.	+	.	gene_id "CNAG_00074"; transcript_id "AFR92211"; exon_number "5"; gene_source "ena"; gene_biotype "protein_coding"; transcript_source "ena"; transcript_biotype "protein_coding"; exon_id "AFR92211-5";
1	ena	CDS	206506	206578	.	+	2	gene_id "CNAG_00074"; transcript_id "AFR92211"; exon_number "5"; gene_source "ena"; gene_biotype "protein_coding"; transcript_source "ena"; transcript_biotype "protein_coding"; protein_id "AFR92211"; protein_version "1";
1	ena	exon	206648	206814	.	+	.	gene_id "CNAG_00074"; transcript_id "AFR92211"; exon_number "6"; gene_source "ena"; gene_biotype "protein_coding"; transcript_source "ena"; transcript_biotype "protein_coding"; exon_id "AFR92211-6";
1	ena	CDS	206648	206814	.	+	1	gene_id "CNAG_00074"; transcript_id "AFR92211"; exon_number "6"; gene_source "ena"; gene_biotype "protein_coding"; transcript_source "ena"; transcript_biotype "protein_coding"; protein_id "AFR92211"; protein_version "1";
1	ena	exon	206866	206997	.	+	.	gene_id "CNAG_00074"; transcript_id "AFR92211"; exon_number "7"; gene_source "ena"; gene_biotype "protein_coding"; transcript_source "ena"; transcript_biotype "protein_coding"; exon_id "AFR92211-7";
1	ena	CDS	206866	206997	.	+	2	gene_id "CNAG_00074"; transcript_id "AFR92211"; exon_number "7"; gene_source "ena"; gene_biotype "protein_coding"; transcript_source "ena"; transcript_biotype "protein_coding"; protein_id "AFR92211"; protein_version "1";
1	ena	exon	207053	207241	.	+	.	gene_id "CNAG_00074"; transcript_id "AFR92211"; exon_number "8"; gene_source "ena"; gene_biotype "protein_coding"; transcript_source "ena"; transcript_biotype "protein_coding"; exon_id "AFR92211-8";
1	ena	CDS	207053	207241	.	+	2	gene_id "CNAG_00074"; transcript_id "AFR92211"; exon_number "8"; gene_source "ena"; gene_biotype "protein_coding"; transcript_source "ena"; transcript_biotype "protein_coding"; protein_id "AFR92211"; protein_version "1";
1	ena	exon	207303	207380	.	+	.	gene_id "CNAG_00074"; transcript_id "AFR92211"; exon_number "9"; gene_source "ena"; gene_biotype "protein_coding"; transcript_source "ena"; transcript_biotype "protein_coding"; exon_id "AFR92211-9";
1	ena	CDS	207303	207380	.	+	2	gene_id "CNAG_00074"; transcript_id "AFR92211"; exon_number "9"; gene_source "ena"; gene_biotype "protein_coding"; transcript_source "ena"; transcript_biotype "protein_coding"; protein_id "AFR92211"; protein_version "1";
1	ena	exon	207442	207448	.	+	.	gene_id "CNAG_00074"; transcript_id "AFR92211"; exon_number "10"; gene_source "ena"; gene_biotype "protein_coding"; transcript_source "ena"; transcript_biotype "protein_coding"; exon_id "AFR92211-10";
1	ena	CDS	207442	207448	.	+	2	gene_id "CNAG_00074"; transcript_id "AFR92211"; exon_number "10"; gene_source "ena"; gene_biotype "protein_coding"; transcript_source "ena"; transcript_biotype "protein_coding"; protein_id "AFR92211"; protein_version "1";
1	ena	exon	207516	207526	.	+	.	gene_id "CNAG_00074"; transcript_id "AFR92211"; exon_number "11"; gene_source "ena"; gene_biotype "protein_coding"; transcript_source "ena"; transcript_biotype "protein_coding"; exon_id "AFR92211-11";
1	ena	CDS	207516	207526	.	+	1	gene_id "CNAG_00074"; transcript_id "AFR92211"; exon_number "11"; gene_source "ena"; gene_biotype "protein_coding"; transcript_source "ena"; transcript_biotype "protein_coding"; protein_id "AFR92211"; protein_version "1";
1	ena	exon	207588	207689	.	+	.	gene_id "CNAG_00074"; transcript_id "AFR92211"; exon_number "12"; gene_source "ena"; gene_biotype "protein_coding"; transcript_source "ena"; transcript_biotype "protein_coding"; exon_id "AFR92211-12";
1	ena	CDS	207588	207689	.	+	2	gene_id "CNAG_00074"; transcript_id "AFR92211"; exon_number "12"; gene_source "ena"; gene_biotype "protein_coding"; transcript_source "ena"; transcript_biotype "protein_coding"; protein_id "AFR92211"; protein_version "1";
1	ena	exon	207751	207816	.	+	.	gene_id "CNAG_00074"; transcript_id "AFR92211"; exon_number "13"; gene_source "ena"; gene_biotype "protein_coding"; transcript_source "ena"; transcript_biotype "protein_coding"; exon_id "AFR92211-13";
1	ena	CDS	207751	207816	.	+	2	gene_id "CNAG_00074"; transcript_id "AFR92211"; exon_number "13"; gene_source "ena"; gene_biotype "protein_coding"; transcript_source "ena"; transcript_biotype "protein_coding"; protein_id "AFR92211"; protein_version "1";
1	ena	exon	207873	207912	.	+	.	gene_id "CNAG_00074"; transcript_id "AFR92211"; exon_number "14"; gene_source "ena"; gene_biotype "protein_coding"; transcript_source "ena"; transcript_biotype "protein_coding"; exon_id "AFR92211-14";
1	ena	CDS	207873	207912	.	+	2	gene_id "CNAG_00074"; transcript_id "AFR92211"; exon_number "14"; gene_source "ena"; gene_biotype "protein_coding"; transcript_source "ena"; transcript_biotype "protein_coding"; protein_id "AFR92211"; protein_version "1";
1	ena	exon	207972	208035	.	+	.	gene_id "CNAG_00074"; transcript_id "AFR92211"; exon_number "15"; gene_source "ena"; gene_biotype "protein_coding"; transcript_source "ena"; transcript_biotype "protein_coding"; exon_id "AFR92211-15";
1	ena	CDS	207972	208035	.	+	1	gene_id "CNAG_00074"; transcript_id "AFR92211"; exon_number "15"; gene_source "ena"; gene_biotype "protein_coding"; transcript_source "ena"; transcript_biotype "protein_coding"; protein_id "AFR92211"; protein_version "1";
1	ena	exon	208092	208337	.	+	.	gene_id "CNAG_00074"; transcript_id "AFR92211"; exon_number "16"; gene_source "ena"; gene_biotype "protein_coding"; transcript_source "ena"; transcript_biotype "protein_coding"; exon_id "AFR92211-16";
1	ena	CDS	208092	208217	.	+	0	gene_id "CNAG_00074"; transcript_id "AFR92211"; exon_number "16"; gene_source "ena"; gene_biotype "protein_coding"; transcript_source "ena"; transcript_biotype "protein_coding"; protein_id "AFR92211"; protein_version "1";
1	ena	stop_codon	208218	208220	.	+	0	gene_id "CNAG_00074"; transcript_id "AFR92211"; exon_number "16"; gene_source "ena"; gene_biotype "protein_coding"; transcript_source "ena"; transcript_biotype "protein_coding";
1	ena	five_prime_utr	205405	205679	.	+	.	gene_id "CNAG_00074"; transcript_id "AFR92211"; gene_source "ena"; gene_biotype "protein_coding"; transcript_source "ena"; transcript_biotype "protein_coding";
1	ena	three_prime_utr	208221	208337	.	+	.	gene_id "CNAG_00074"; transcript_id "AFR92211"; gene_source "ena"; gene_biotype "protein_coding"; transcript_source "ena"; transcript_biotype "protein_coding";
1	ena	gene	208302	209325	.	-	.	gene_id "CNAG_00075"; gene_source "ena"; gene_biotype "protein_coding";
1	ena	transcript	208302	209325	.	-	.	gene_id "CNAG_00075"; transcript_id "AFR92212"; gene_source "ena"; gene_biotype "protein_coding"; transcript_source "ena"; transcript_biotype "protein_coding";
1	ena	exon	209172	209325	.	-	.	gene_id "CNAG_00075"; transcript_id "AFR92212"; exon_number "1"; gene_source "ena"; gene_biotype "protein_coding"; transcript_source "ena"; transcript_biotype "protein_coding"; exon_id "AFR92212-1";
1	ena	CDS	209172	209249	.	-	0	gene_id "CNAG_00075"; transcript_id "AFR92212"; exon_number "1"; gene_source "ena"; gene_biotype "protein_coding"; transcript_source "ena"; transcript_biotype "protein_coding"; protein_id "AFR92212"; protein_version "1";
1	ena	start_codon	209247	209249	.	-	0	gene_id "CNAG_00075"; transcript_id "AFR92212"; exon_number "1"; gene_source "ena"; gene_biotype "protein_coding"; transcript_source "ena"; transcript_biotype "protein_coding";
1	ena	exon	208942	209096	.	-	.	gene_id "CNAG_00075"; transcript_id "AFR92212"; exon_number "2"; gene_source "ena"; gene_biotype "protein_coding"; transcript_source "ena"; transcript_biotype "protein_coding"; exon_id "AFR92212-2";
1	ena	CDS	208942	209096	.	-	0	gene_id "CNAG_00075"; transcript_id "AFR92212"; exon_number "2"; gene_source "ena"; gene_biotype "protein_coding"; transcript_source "ena"; transcript_biotype "protein_coding"; protein_id "AFR92212"; protein_version "1";
1	ena	exon	208302	208875	.	-	.	gene_id "CNAG_00075"; transcript_id "AFR92212"; exon_number "3"; gene_source "ena"; gene_biotype "protein_coding"; transcript_source "ena"; transcript_biotype "protein_coding"; exon_id "AFR92212-3";
1	ena	CDS	208638	208875	.	-	1	gene_id "CNAG_00075"; transcript_id "AFR92212"; exon_number "3"; gene_source "ena"; gene_biotype "protein_coding"; transcript_source "ena"; transcript_biotype "protein_coding"; protein_id "AFR92212"; protein_version "1";
1	ena	stop_codon	208635	208637	.	-	0	gene_id "CNAG_00075"; transcript_id "AFR92212"; exon_number "3"; gene_source "ena"; gene_biotype "protein_coding"; transcript_source "ena"; transcript_biotype "protein_coding";
1	ena	five_prime_utr	209250	209325	.	-	.	gene_id "CNAG_00075"; transcript_id "AFR92212"; gene_source "ena"; gene_biotype "protein_coding"; transcript_source "ena"; transcript_biotype "protein_coding";
1	ena	three_prime_utr	208302	208634	.	-	.	gene_id "CNAG_00075"; transcript_id "AFR92212"; gene_source "ena"; gene_biotype "protein_coding"; transcript_source "ena"; transcript_biotype "protein_coding";
1	ena	gene	209522	212040	.	+	.	gene_id "CNAG_00076"; gene_source "ena"; gene_biotype "protein_coding";
1	ena	transcript	209522	212040	.	+	.	gene_id "CNAG_00076"; transcript_id "AFR92213"; gene_source "ena"; gene_biotype "protein_coding"; transcript_source "ena"; transcript_biotype "protein_coding";
1	ena	exon	209522	209927	.	+	.	gene_id "CNAG_00076"; transcript_id "AFR92213"; exon_number "1"; gene_source "ena"; gene_biotype "protein_coding"; transcript_source "ena"; transcript_biotype "protein_coding"; exon_id "AFR92213-1";
1	ena	CDS	209617	209927	.	+	0	gene_id "CNAG_00076"; transcript_id "AFR92213"; exon_number "1"; gene_source "ena"; gene_biotype "protein_coding"; transcript_source "ena"; transcript_biotype "protein_coding"; protein_id "AFR92213"; protein_version "1";
1	ena	start_codon	209617	209619	.	+	0	gene_id "CNAG_00076"; transcript_id "AFR92213"; exon_number "1"; gene_source "ena"; gene_biotype "protein_coding"; transcript_source "ena"; transcript_biotype "protein_coding";
1	ena	exon	209980	210058	.	+	.	gene_id "CNAG_00076"; transcript_id "AFR92213"; exon_number "2"; gene_source "ena"; gene_biotype "protein_coding"; transcript_source "ena"; transcript_biotype "protein_coding"; exon_id "AFR92213-2";
1	ena	CDS	209980	210058	.	+	1	gene_id "CNAG_00076"; transcript_id "AFR92213"; exon_number "2"; gene_source "ena"; gene_biotype "protein_coding"; transcript_source "ena"; transcript_biotype "protein_coding"; protein_id "AFR92213"; protein_version "1";
1	ena	exon	210119	210125	.	+	.	gene_id "CNAG_00076"; transcript_id "AFR92213"; exon_number "3"; gene_source "ena"; gene_biotype "protein_coding"; transcript_source "ena"; transcript_biotype "protein_coding"; exon_id "AFR92213-3";
1	ena	CDS	210119	210125	.	+	0	gene_id "CNAG_00076"; transcript_id "AFR92213"; exon_number "3"; gene_source "ena"; gene_biotype "protein_coding"; transcript_source "ena"; transcript_biotype "protein_coding"; protein_id "AFR92213"; protein_version "1";
1	ena	exon	210187	210224	.	+	.	gene_id "CNAG_00076"; transcript_id "AFR92213"; exon_number "4"; gene_source "ena"; gene_biotype "protein_coding"; transcript_source "ena"; transcript_biotype "protein_coding"; exon_id "AFR92213-4";
1	ena	CDS	210187	210224	.	+	2	gene_id "CNAG_00076"; transcript_id "AFR92213"; exon_number "4"; gene_source "ena"; gene_biotype "protein_coding"; transcript_source "ena"; transcript_biotype "protein_coding"; protein_id "AFR92213"; protein_version "1";
1	ena	exon	210278	210349	.	+	.	gene_id "CNAG_00076"; transcript_id "AFR92213"; exon_number "5"; gene_source "ena"; gene_biotype "protein_coding"; transcript_source "ena"; transcript_biotype "protein_coding"; exon_id "AFR92213-5";
1	ena	CDS	210278	210349	.	+	0	gene_id "CNAG_00076"; transcript_id "AFR92213"; exon_number "5"; gene_source "ena"; gene_biotype "protein_coding"; transcript_source "ena"; transcript_biotype "protein_coding"; protein_id "AFR92213"; protein_version "1";
1	ena	exon	210406	210424	.	+	.	gene_id "CNAG_00076"; transcript_id "AFR92213"; exon_number "6"; gene_source "ena"; gene_biotype "protein_coding"; transcript_source "ena"; transcript_biotype "protein_coding"; exon_id "AFR92213-6";
1	ena	CDS	210406	210424	.	+	0	gene_id "CNAG_00076"; transcript_id "AFR92213"; exon_number "6"; gene_source "ena"; gene_biotype "protein_coding"; transcript_source "ena"; transcript_biotype "protein_coding"; protein_id "AFR92213"; protein_version "1";
1	ena	exon	210474	210617	.	+	.	gene_id "CNAG_00076"; transcript_id "AFR92213"; exon_number "7"; gene_source "ena"; gene_biotype "protein_coding"; transcript_source "ena"; transcript_biotype "protein_coding"; exon_id "AFR92213-7";
1	ena	CDS	210474	210617	.	+	2	gene_id "CNAG_00076"; transcript_id "AFR92213"; exon_number "7"; gene_source "ena"; gene_biotype "protein_coding"; transcript_source "ena"; transcript_biotype "protein_coding"; protein_id "AFR92213"; protein_version "1";
1	ena	exon	210662	210702	.	+	.	gene_id "CNAG_00076"; transcript_id "AFR92213"; exon_number "8"; gene_source "ena"; gene_biotype "protein_coding"; transcript_source "ena"; transcript_biotype "protein_coding"; exon_id "AFR92213-8";
1	ena	CDS	210662	210702	.	+	2	gene_id "CNAG_00076"; transcript_id "AFR92213"; exon_number "8"; gene_source "ena"; gene_biotype "protein_coding"; transcript_source "ena"; transcript_biotype "protein_coding"; protein_id "AFR92213"; protein_version "1";
1	ena	exon	210750	210911	.	+	.	gene_id "CNAG_00076"; transcript_id "AFR92213"; exon_number "9"; gene_source "ena"; gene_biotype "protein_coding"; transcript_source "ena"; transcript_biotype "protein_coding"; exon_id "AFR92213-9";
1	ena	CDS	210750	210911	.	+	0	gene_id "CNAG_00076"; transcript_id "AFR92213"; exon_number "9"; gene_source "ena"; gene_biotype "protein_coding"; transcript_source "ena"; transcript_biotype "protein_coding"; protein_id "AFR92213"; protein_version "1";
1	ena	exon	210971	211063	.	+	.	gene_id "CNAG_00076"; transcript_id "AFR92213"; exon_number "10"; gene_source "ena"; gene_biotype "protein_coding"; transcript_source "ena"; transcript_biotype "protein_coding"; exon_id "AFR92213-10";
1	ena	CDS	210971	211063	.	+	0	gene_id "CNAG_00076"; transcript_id "AFR92213"; exon_number "10"; gene_source "ena"; gene_biotype "protein_coding"; transcript_source "ena"; transcript_biotype "protein_coding"; protein_id "AFR92213"; protein_version "1";
1	ena	exon	211119	211338	.	+	.	gene_id "CNAG_00076"; transcript_id "AFR92213"; exon_number "11"; gene_source "ena"; gene_biotype "protein_coding"; transcript_source "ena"; transcript_biotype "protein_coding"; exon_id "AFR92213-11";
1	ena	CDS	211119	211338	.	+	0	gene_id "CNAG_00076"; transcript_id "AFR92213"; exon_number "11"; gene_source "ena"; gene_biotype "protein_coding"; transcript_source "ena"; transcript_biotype "protein_coding"; protein_id "AFR92213"; protein_version "1";
1	ena	exon	211392	212040	.	+	.	gene_id "CNAG_00076"; transcript_id "AFR92213"; exon_number "12"; gene_source "ena"; gene_biotype "protein_coding"; transcript_source "ena"; transcript_biotype "protein_coding"; exon_id "AFR92213-12";
1	ena	CDS	211392	211921	.	+	2	gene_id "CNAG_00076"; transcript_id "AFR92213"; exon_number "12"; gene_source "ena"; gene_biotype "protein_coding"; transcript_source "ena"; transcript_biotype "protein_coding"; protein_id "AFR92213"; protein_version "1";
1	ena	five_prime_utr	209522	209616	.	+	.	gene_id "CNAG_00076"; transcript_id "AFR92213"; gene_source "ena"; gene_biotype "protein_coding"; transcript_source "ena"; transcript_biotype "protein_coding";
1	ena	three_prime_utr	211922	212040	.	+	.	gene_id "CNAG_00076"; transcript_id "AFR92213"; gene_source "ena"; gene_biotype "protein_coding"; transcript_source "ena"; transcript_biotype "protein_coding";
1	ena	gene	212491	213133	.	-	.	gene_id "CNAG_07947"; gene_source "ena"; gene_biotype "protein_coding";
1	ena	transcript	212491	213133	.	-	.	gene_id "CNAG_07947"; transcript_id "AGV15267"; gene_source "ena"; gene_biotype "protein_coding"; transcript_source "ena"; transcript_biotype "protein_coding";
1	ena	exon	213055	213133	.	-	.	gene_id "CNAG_07947"; transcript_id "AGV15267"; exon_number "1"; gene_source "ena"; gene_biotype "protein_coding"; transcript_source "ena"; transcript_biotype "protein_coding"; exon_id "AGV15267-1";
1	ena	CDS	213055	213106	.	-	0	gene_id "CNAG_07947"; transcript_id "AGV15267"; exon_number "1"; gene_source "ena"; gene_biotype "protein_coding"; transcript_source "ena"; transcript_biotype "protein_coding"; protein_id "AGV15267"; protein_version "1";
1	ena	start_codon	213104	213106	.	-	0	gene_id "CNAG_07947"; transcript_id "AGV15267"; exon_number "1"; gene_source "ena"; gene_biotype "protein_coding"; transcript_source "ena"; transcript_biotype "protein_coding";
1	ena	exon	212491	212916	.	-	.	gene_id "CNAG_07947"; transcript_id "AGV15267"; exon_number "2"; gene_source "ena"; gene_biotype "protein_coding"; transcript_source "ena"; transcript_biotype "protein_coding"; exon_id "AGV15267-2";
1	ena	CDS	212669	212916	.	-	2	gene_id "CNAG_07947"; transcript_id "AGV15267"; exon_number "2"; gene_source "ena"; gene_biotype "protein_coding"; transcript_source "ena"; transcript_biotype "protein_coding"; protein_id "AGV15267"; protein_version "1";
1	ena	five_prime_utr	213107	213133	.	-	.	gene_id "CNAG_07947"; transcript_id "AGV15267"; gene_source "ena"; gene_biotype "protein_coding"; transcript_source "ena"; transcript_biotype "protein_coding";
1	ena	three_prime_utr	212491	212668	.	-	.	gene_id "CNAG_07947"; transcript_id "AGV15267"; gene_source "ena"; gene_biotype "protein_coding"; transcript_source "ena"; transcript_biotype "protein_coding";
1	ena	gene	213364	216529	.	+	.	gene_id "CNAG_00077"; gene_source "ena"; gene_biotype "protein_coding";
1	ena	transcript	213364	216529	.	+	.	gene_id "CNAG_00077"; transcript_id "AFR92214"; gene_source "ena"; gene_biotype "protein_coding"; transcript_source "ena"; transcript_biotype "protein_coding";
1	ena	exon	213364	213966	.	+	.	gene_id "CNAG_00077"; transcript_id "AFR92214"; exon_number "1"; gene_source "ena"; gene_biotype "protein_coding"; transcript_source "ena"; transcript_biotype "protein_coding"; exon_id "AFR92214-1";
1	ena	CDS	213664	213966	.	+	0	gene_id "CNAG_00077"; transcript_id "AFR92214"; exon_number "1"; gene_source "ena"; gene_biotype "protein_coding"; transcript_source "ena"; transcript_biotype "protein_coding"; protein_id "AFR92214"; protein_version "1";
1	ena	start_codon	213664	213666	.	+	0	gene_id "CNAG_00077"; transcript_id "AFR92214"; exon_number "1"; gene_source "ena"; gene_biotype "protein_coding"; transcript_source "ena"; transcript_biotype "protein_coding";
1	ena	exon	214024	214109	.	+	.	gene_id "CNAG_00077"; transcript_id "AFR92214"; exon_number "2"; gene_source "ena"; gene_biotype "protein_coding"; transcript_source "ena"; transcript_biotype "protein_coding"; exon_id "AFR92214-2";
1	ena	CDS	214024	214109	.	+	0	gene_id "CNAG_00077"; transcript_id "AFR92214"; exon_number "2"; gene_source "ena"; gene_biotype "protein_coding"; transcript_source "ena"; transcript_biotype "protein_coding"; protein_id "AFR92214"; protein_version "1";
1	ena	exon	214160	214473	.	+	.	gene_id "CNAG_00077"; transcript_id "AFR92214"; exon_number "3"; gene_source "ena"; gene_biotype "protein_coding"; transcript_source "ena"; transcript_biotype "protein_coding"; exon_id "AFR92214-3";
1	ena	CDS	214160	214473	.	+	1	gene_id "CNAG_00077"; transcript_id "AFR92214"; exon_number "3"; gene_source "ena"; gene_biotype "protein_coding"; transcript_source "ena"; transcript_biotype "protein_coding"; protein_id "AFR92214"; protein_version "1";
1	ena	exon	214530	216529	.	+	.	gene_id "CNAG_00077"; transcript_id "AFR92214"; exon_number "4"; gene_source "ena"; gene_biotype "protein_coding"; transcript_source "ena"; transcript_biotype "protein_coding"; exon_id "AFR92214-4";
1	ena	CDS	214530	216289	.	+	2	gene_id "CNAG_00077"; transcript_id "AFR92214"; exon_number "4"; gene_source "ena"; gene_biotype "protein_coding"; transcript_source "ena"; transcript_biotype "protein_coding"; protein_id "AFR92214"; protein_version "1";
1	ena	stop_codon	216290	216292	.	+	0	gene_id "CNAG_00077"; transcript_id "AFR92214"; exon_number "4"; gene_source "ena"; gene_biotype "protein_coding"; transcript_source "ena"; transcript_biotype "protein_coding";
1	ena	five_prime_utr	213364	213663	.	+	.	gene_id "CNAG_00077"; transcript_id "AFR92214"; gene_source "ena"; gene_biotype "protein_coding"; transcript_source "ena"; transcript_biotype "protein_coding";
1	ena	three_prime_utr	216293	216529	.	+	.	gene_id "CNAG_00077"; transcript_id "AFR92214"; gene_source "ena"; gene_biotype "protein_coding"; transcript_source "ena"; transcript_biotype "protein_coding";
1	ena	gene	216693	221442	.	+	.	gene_id "CNAG_00078"; gene_source "ena"; gene_biotype "protein_coding";
1	ena	transcript	216693	221442	.	+	.	gene_id "CNAG_00078"; transcript_id "AFR92215"; gene_source "ena"; gene_biotype "protein_coding"; transcript_source "ena"; transcript_biotype "protein_coding";
1	ena	exon	216693	217432	.	+	.	gene_id "CNAG_00078"; transcript_id "AFR92215"; exon_number "1"; gene_source "ena"; gene_biotype "protein_coding"; transcript_source "ena"; transcript_biotype "protein_coding"; exon_id "AFR92215-1";
1	ena	CDS	217128	217432	.	+	0	gene_id "CNAG_00078"; transcript_id "AFR92215"; exon_number "1"; gene_source "ena"; gene_biotype "protein_coding"; transcript_source "ena"; transcript_biotype "protein_coding"; protein_id "AFR92215"; protein_version "1";
1	ena	start_codon	217128	217130	.	+	0	gene_id "CNAG_00078"; transcript_id "AFR92215"; exon_number "1"; gene_source "ena"; gene_biotype "protein_coding"; transcript_source "ena"; transcript_biotype "protein_coding";
1	ena	exon	217491	218614	.	+	.	gene_id "CNAG_00078"; transcript_id "AFR92215"; exon_number "2"; gene_source "ena"; gene_biotype "protein_coding"; transcript_source "ena"; transcript_biotype "protein_coding"; exon_id "AFR92215-2";
1	ena	CDS	217491	218614	.	+	1	gene_id "CNAG_00078"; transcript_id "AFR92215"; exon_number "2"; gene_source "ena"; gene_biotype "protein_coding"; transcript_source "ena"; transcript_biotype "protein_coding"; protein_id "AFR92215"; protein_version "1";
1	ena	exon	218660	218735	.	+	.	gene_id "CNAG_00078"; transcript_id "AFR92215"; exon_number "3"; gene_source "ena"; gene_biotype "protein_coding"; transcript_source "ena"; transcript_biotype "protein_coding"; exon_id "AFR92215-3";
1	ena	CDS	218660	218735	.	+	2	gene_id "CNAG_00078"; transcript_id "AFR92215"; exon_number "3"; gene_source "ena"; gene_biotype "protein_coding"; transcript_source "ena"; transcript_biotype "protein_coding"; protein_id "AFR92215"; protein_version "1";
1	ena	exon	218785	219133	.	+	.	gene_id "CNAG_00078"; transcript_id "AFR92215"; exon_number "4"; gene_source "ena"; gene_biotype "protein_coding"; transcript_source "ena"; transcript_biotype "protein_coding"; exon_id "AFR92215-4";
1	ena	CDS	218785	219133	.	+	1	gene_id "CNAG_00078"; transcript_id "AFR92215"; exon_number "4"; gene_source "ena"; gene_biotype "protein_coding"; transcript_source "ena"; transcript_biotype "protein_coding"; protein_id "AFR92215"; protein_version "1";
1	ena	exon	219184	219276	.	+	.	gene_id "CNAG_00078"; transcript_id "AFR92215"; exon_number "5"; gene_source "ena"; gene_biotype "protein_coding"; transcript_source "ena"; transcript_biotype "protein_coding"; exon_id "AFR92215-5";
1	ena	CDS	219184	219276	.	+	0	gene_id "CNAG_00078"; transcript_id "AFR92215"; exon_number "5"; gene_source "ena"; gene_biotype "protein_coding"; transcript_source "ena"; transcript_biotype "protein_coding"; protein_id "AFR92215"; protein_version "1";
1	ena	exon	219339	219477	.	+	.	gene_id "CNAG_00078"; transcript_id "AFR92215"; exon_number "6"; gene_source "ena"; gene_biotype "protein_coding"; transcript_source "ena"; transcript_biotype "protein_coding"; exon_id "AFR92215-6";
1	ena	CDS	219339	219477	.	+	0	gene_id "CNAG_00078"; transcript_id "AFR92215"; exon_number "6"; gene_source "ena"; gene_biotype "protein_coding"; transcript_source "ena"; transcript_biotype "protein_coding"; protein_id "AFR92215"; protein_version "1";
1	ena	exon	219533	219631	.	+	.	gene_id "CNAG_00078"; transcript_id "AFR92215"; exon_number "7"; gene_source "ena"; gene_biotype "protein_coding"; transcript_source "ena"; transcript_biotype "protein_coding"; exon_id "AFR92215-7";
1	ena	CDS	219533	219631	.	+	2	gene_id "CNAG_00078"; transcript_id "AFR92215"; exon_number "7"; gene_source "ena"; gene_biotype "protein_coding"; transcript_source "ena"; transcript_biotype "protein_coding"; protein_id "AFR92215"; protein_version "1";
1	ena	exon	219683	219815	.	+	.	gene_id "CNAG_00078"; transcript_id "AFR92215"; exon_number "8"; gene_source "ena"; gene_biotype "protein_coding"; transcript_source "ena"; transcript_biotype "protein_coding"; exon_id "AFR92215-8";
1	ena	CDS	219683	219815	.	+	2	gene_id "CNAG_00078"; transcript_id "AFR92215"; exon_number "8"; gene_source "ena"; gene_biotype "protein_coding"; transcript_source "ena"; transcript_biotype "protein_coding"; protein_id "AFR92215"; protein_version "1";
1	ena	exon	219866	220065	.	+	.	gene_id "CNAG_00078"; transcript_id "AFR92215"; exon_number "9"; gene_source "ena"; gene_biotype "protein_coding"; transcript_source "ena"; transcript_biotype "protein_coding"; exon_id "AFR92215-9";
1	ena	CDS	219866	220065	.	+	1	gene_id "CNAG_00078"; transcript_id "AFR92215"; exon_number "9"; gene_source "ena"; gene_biotype "protein_coding"; transcript_source "ena"; transcript_biotype "protein_coding"; protein_id "AFR92215"; protein_version "1";
1	ena	exon	220116	220440	.	+	.	gene_id "CNAG_00078"; transcript_id "AFR92215"; exon_number "10"; gene_source "ena"; gene_biotype "protein_coding"; transcript_source "ena"; transcript_biotype "protein_coding"; exon_id "AFR92215-10";
1	ena	CDS	220116	220440	.	+	2	gene_id "CNAG_00078"; transcript_id "AFR92215"; exon_number "10"; gene_source "ena"; gene_biotype "protein_coding"; transcript_source "ena"; transcript_biotype "protein_coding"; protein_id "AFR92215"; protein_version "1";
1	ena	exon	220491	220654	.	+	.	gene_id "CNAG_00078"; transcript_id "AFR92215"; exon_number "11"; gene_source "ena"; gene_biotype "protein_coding"; transcript_source "ena"; transcript_biotype "protein_coding"; exon_id "AFR92215-11";
1	ena	CDS	220491	220654	.	+	1	gene_id "CNAG_00078"; transcript_id "AFR92215"; exon_number "11"; gene_source "ena"; gene_biotype "protein_coding"; transcript_source "ena"; transcript_biotype "protein_coding"; protein_id "AFR92215"; protein_version "1";
1	ena	exon	220705	221175	.	+	.	gene_id "CNAG_00078"; transcript_id "AFR92215"; exon_number "12"; gene_source "ena"; gene_biotype "protein_coding"; transcript_source "ena"; transcript_biotype "protein_coding"; exon_id "AFR92215-12";
1	ena	CDS	220705	221175	.	+	2	gene_id "CNAG_00078"; transcript_id "AFR92215"; exon_number "12"; gene_source "ena"; gene_biotype "protein_coding"; transcript_source "ena"; transcript_biotype "protein_coding"; protein_id "AFR92215"; protein_version "1";
1	ena	exon	221231	221442	.	+	.	gene_id "CNAG_00078"; transcript_id "AFR92215"; exon_number "13"; gene_source "ena"; gene_biotype "protein_coding"; transcript_source "ena"; transcript_biotype "protein_coding"; exon_id "AFR92215-13";
1	ena	CDS	221231	221283	.	+	2	gene_id "CNAG_00078"; transcript_id "AFR92215"; exon_number "13"; gene_source "ena"; gene_biotype "protein_coding"; transcript_source "ena"; transcript_biotype "protein_coding"; protein_id "AFR92215"; protein_version "1";
1	ena	stop_codon	221284	221286	.	+	0	gene_id "CNAG_00078"; transcript_id "AFR92215"; exon_number "13"; gene_source "ena"; gene_biotype "protein_coding"; transcript_source "ena"; transcript_biotype "protein_coding";
1	ena	five_prime_utr	216693	217127	.	+	.	gene_id "CNAG_00078"; transcript_id "AFR92215"; gene_source "ena"; gene_biotype "protein_coding"; transcript_source "ena"; transcript_biotype "protein_coding";
1	ena	three_prime_utr	221287	221442	.	+	.	gene_id "CNAG_00078"; transcript_id "AFR92215"; gene_source "ena"; gene_biotype "protein_coding"; transcript_source "ena"; transcript_biotype "protein_coding";
1	ena	gene	221990	222314	.	+	.	gene_id "CNAG_12014"; gene_name "CNAG_12014"; gene_source "ena"; gene_biotype "ncRNA";
1	ena	transcript	221990	222314	.	+	.	gene_id "CNAG_12014"; transcript_id "CNAG_12014-1"; gene_name "CNAG_12014"; gene_source "ena"; gene_biotype "ncRNA"; transcript_name "CNAG_12014"; transcript_source "ena"; transcript_biotype "ncRNA";
1	ena	exon	221990	222314	.	+	.	gene_id "CNAG_12014"; transcript_id "CNAG_12014-1"; exon_number "1"; gene_name "CNAG_12014"; gene_source "ena"; gene_biotype "ncRNA"; transcript_name "CNAG_12014"; transcript_source "ena"; transcript_biotype "ncRNA"; exon_id "CNAG_12014-1-1";
1	ena	gene	223148	224648	.	+	.	gene_id "CNAG_00079"; gene_source "ena"; gene_biotype "protein_coding";
1	ena	transcript	223148	224648	.	+	.	gene_id "CNAG_00079"; transcript_id "AFR92216"; gene_source "ena"; gene_biotype "protein_coding"; transcript_source "ena"; transcript_biotype "protein_coding";
1	ena	exon	223148	223762	.	+	.	gene_id "CNAG_00079"; transcript_id "AFR92216"; exon_number "1"; gene_source "ena"; gene_biotype "protein_coding"; transcript_source "ena"; transcript_biotype "protein_coding"; exon_id "AFR92216-1";
1	ena	CDS	223667	223762	.	+	0	gene_id "CNAG_00079"; transcript_id "AFR92216"; exon_number "1"; gene_source "ena"; gene_biotype "protein_coding"; transcript_source "ena"; transcript_biotype "protein_coding"; protein_id "AFR92216"; protein_version "1";
1	ena	start_codon	223667	223669	.	+	0	gene_id "CNAG_00079"; transcript_id "AFR92216"; exon_number "1"; gene_source "ena"; gene_biotype "protein_coding"; transcript_source "ena"; transcript_biotype "protein_coding";
1	ena	exon	223812	224648	.	+	.	gene_id "CNAG_00079"; transcript_id "AFR92216"; exon_number "2"; gene_source "ena"; gene_biotype "protein_coding"; transcript_source "ena"; transcript_biotype "protein_coding"; exon_id "AFR92216-2";
1	ena	CDS	223812	224471	.	+	0	gene_id "CNAG_00079"; transcript_id "AFR92216"; exon_number "2"; gene_source "ena"; gene_biotype "protein_coding"; transcript_source "ena"; transcript_biotype "protein_coding"; protein_id "AFR92216"; protein_version "1";
1	ena	stop_codon	224472	224474	.	+	0	gene_id "CNAG_00079"; transcript_id "AFR92216"; exon_number "2"; gene_source "ena"; gene_biotype "protein_coding"; transcript_source "ena"; transcript_biotype "protein_coding";
1	ena	five_prime_utr	223148	223666	.	+	.	gene_id "CNAG_00079"; transcript_id "AFR92216"; gene_source "ena"; gene_biotype "protein_coding"; transcript_source "ena"; transcript_biotype "protein_coding";
1	ena	three_prime_utr	224475	224648	.	+	.	gene_id "CNAG_00079"; transcript_id "AFR92216"; gene_source "ena"; gene_biotype "protein_coding"; transcript_source "ena"; transcript_biotype "protein_coding";
1	ena	gene	225190	227173	.	-	.	gene_id "CNAG_00080"; gene_source "ena"; gene_biotype "protein_coding";
1	ena	transcript	225190	227173	.	-	.	gene_id "CNAG_00080"; transcript_id "AFR92217"; gene_source "ena"; gene_biotype "protein_coding"; transcript_source "ena"; transcript_biotype "protein_coding";
1	ena	exon	227108	227173	.	-	.	gene_id "CNAG_00080"; transcript_id "AFR92217"; exon_number "1"; gene_source "ena"; gene_biotype "protein_coding"; transcript_source "ena"; transcript_biotype "protein_coding"; exon_id "AFR92217-1";
1	ena	CDS	227108	227173	.	-	0	gene_id "CNAG_00080"; transcript_id "AFR92217"; exon_number "1"; gene_source "ena"; gene_biotype "protein_coding"; transcript_source "ena"; transcript_biotype "protein_coding"; protein_id "AFR92217"; protein_version "1";
1	ena	start_codon	227171	227173	.	-	0	gene_id "CNAG_00080"; transcript_id "AFR92217"; exon_number "1"; gene_source "ena"; gene_biotype "protein_coding"; transcript_source "ena"; transcript_biotype "protein_coding";
1	ena	exon	226968	227056	.	-	.	gene_id "CNAG_00080"; transcript_id "AFR92217"; exon_number "2"; gene_source "ena"; gene_biotype "protein_coding"; transcript_source "ena"; transcript_biotype "protein_coding"; exon_id "AFR92217-2";
1	ena	CDS	226968	227056	.	-	0	gene_id "CNAG_00080"; transcript_id "AFR92217"; exon_number "2"; gene_source "ena"; gene_biotype "protein_coding"; transcript_source "ena"; transcript_biotype "protein_coding"; protein_id "AFR92217"; protein_version "1";
1	ena	exon	226236	226908	.	-	.	gene_id "CNAG_00080"; transcript_id "AFR92217"; exon_number "3"; gene_source "ena"; gene_biotype "protein_coding"; transcript_source "ena"; transcript_biotype "protein_coding"; exon_id "AFR92217-3";
1	ena	CDS	226236	226908	.	-	1	gene_id "CNAG_00080"; transcript_id "AFR92217"; exon_number "3"; gene_source "ena"; gene_biotype "protein_coding"; transcript_source "ena"; transcript_biotype "protein_coding"; protein_id "AFR92217"; protein_version "1";
1	ena	exon	225190	226177	.	-	.	gene_id "CNAG_00080"; transcript_id "AFR92217"; exon_number "4"; gene_source "ena"; gene_biotype "protein_coding"; transcript_source "ena"; transcript_biotype "protein_coding"; exon_id "AFR92217-4";
1	ena	CDS	225551	226177	.	-	0	gene_id "CNAG_00080"; transcript_id "AFR92217"; exon_number "4"; gene_source "ena"; gene_biotype "protein_coding"; transcript_source "ena"; transcript_biotype "protein_coding"; protein_id "AFR92217"; protein_version "1";
1	ena	three_prime_utr	225190	225550	.	-	.	gene_id "CNAG_00080"; transcript_id "AFR92217"; gene_source "ena"; gene_biotype "protein_coding"; transcript_source "ena"; transcript_biotype "protein_coding";
1	ena	gene	227600	230987	.	-	.	gene_id "CNAG_00081"; gene_source "ena"; gene_biotype "protein_coding";
1	ena	transcript	227600	230987	.	-	.	gene_id "CNAG_00081"; transcript_id "AFR92218"; gene_source "ena"; gene_biotype "protein_coding"; transcript_source "ena"; transcript_biotype "protein_coding";
1	ena	exon	230872	230987	.	-	.	gene_id "CNAG_00081"; transcript_id "AFR92218"; exon_number "1"; gene_source "ena"; gene_biotype "protein_coding"; transcript_source "ena"; transcript_biotype "protein_coding"; exon_id "AFR92218-1";
1	ena	CDS	230872	230931	.	-	0	gene_id "CNAG_00081"; transcript_id "AFR92218"; exon_number "1"; gene_source "ena"; gene_biotype "protein_coding"; transcript_source "ena"; transcript_biotype "protein_coding"; protein_id "AFR92218"; protein_version "1";
1	ena	start_codon	230929	230931	.	-	0	gene_id "CNAG_00081"; transcript_id "AFR92218"; exon_number "1"; gene_source "ena"; gene_biotype "protein_coding"; transcript_source "ena"; transcript_biotype "protein_coding";
1	ena	exon	230777	230817	.	-	.	gene_id "CNAG_00081"; transcript_id "AFR92218"; exon_number "2"; gene_source "ena"; gene_biotype "protein_coding"; transcript_source "ena"; transcript_biotype "protein_coding"; exon_id "AFR92218-2";
1	ena	CDS	230777	230817	.	-	0	gene_id "CNAG_00081"; transcript_id "AFR92218"; exon_number "2"; gene_source "ena"; gene_biotype "protein_coding"; transcript_source "ena"; transcript_biotype "protein_coding"; protein_id "AFR92218"; protein_version "1";
1	ena	exon	230480	230722	.	-	.	gene_id "CNAG_00081"; transcript_id "AFR92218"; exon_number "3"; gene_source "ena"; gene_biotype "protein_coding"; transcript_source "ena"; transcript_biotype "protein_coding"; exon_id "AFR92218-3";
1	ena	CDS	230480	230722	.	-	1	gene_id "CNAG_00081"; transcript_id "AFR92218"; exon_number "3"; gene_source "ena"; gene_biotype "protein_coding"; transcript_source "ena"; transcript_biotype "protein_coding"; protein_id "AFR92218"; protein_version "1";
1	ena	exon	230154	230424	.	-	.	gene_id "CNAG_00081"; transcript_id "AFR92218"; exon_number "4"; gene_source "ena"; gene_biotype "protein_coding"; transcript_source "ena"; transcript_biotype "protein_coding"; exon_id "AFR92218-4";
1	ena	CDS	230154	230424	.	-	1	gene_id "CNAG_00081"; transcript_id "AFR92218"; exon_number "4"; gene_source "ena"; gene_biotype "protein_coding"; transcript_source "ena"; transcript_biotype "protein_coding"; protein_id "AFR92218"; protein_version "1";
1	ena	exon	230019	230105	.	-	.	gene_id "CNAG_00081"; transcript_id "AFR92218"; exon_number "5"; gene_source "ena"; gene_biotype "protein_coding"; transcript_source "ena"; transcript_biotype "protein_coding"; exon_id "AFR92218-5";
1	ena	CDS	230019	230105	.	-	0	gene_id "CNAG_00081"; transcript_id "AFR92218"; exon_number "5"; gene_source "ena"; gene_biotype "protein_coding"; transcript_source "ena"; transcript_biotype "protein_coding"; protein_id "AFR92218"; protein_version "1";
1	ena	exon	228885	229963	.	-	.	gene_id "CNAG_00081"; transcript_id "AFR92218"; exon_number "6"; gene_source "ena"; gene_biotype "protein_coding"; transcript_source "ena"; transcript_biotype "protein_coding"; exon_id "AFR92218-6";
1	ena	CDS	228885	229963	.	-	0	gene_id "CNAG_00081"; transcript_id "AFR92218"; exon_number "6"; gene_source "ena"; gene_biotype "protein_coding"; transcript_source "ena"; transcript_biotype "protein_coding"; protein_id "AFR92218"; protein_version "1";
1	ena	exon	228196	228833	.	-	.	gene_id "CNAG_00081"; transcript_id "AFR92218"; exon_number "7"; gene_source "ena"; gene_biotype "protein_coding"; transcript_source "ena"; transcript_biotype "protein_coding"; exon_id "AFR92218-7";
1	ena	CDS	228196	228833	.	-	1	gene_id "CNAG_00081"; transcript_id "AFR92218"; exon_number "7"; gene_source "ena"; gene_biotype "protein_coding"; transcript_source "ena"; transcript_biotype "protein_coding"; protein_id "AFR92218"; protein_version "1";
1	ena	exon	227872	228137	.	-	.	gene_id "CNAG_00081"; transcript_id "AFR92218"; exon_number "8"; gene_source "ena"; gene_biotype "protein_coding"; transcript_source "ena"; transcript_biotype "protein_coding"; exon_id "AFR92218-8";
1	ena	CDS	227872	228137	.	-	2	gene_id "CNAG_00081"; transcript_id "AFR92218"; exon_number "8"; gene_source "ena"; gene_biotype "protein_coding"; transcript_source "ena"; transcript_biotype "protein_coding"; protein_id "AFR92218"; protein_version "1";
1	ena	exon	227600	227809	.	-	.	gene_id "CNAG_00081"; transcript_id "AFR92218"; exon_number "9"; gene_source "ena"; gene_biotype "protein_coding"; transcript_source "ena"; transcript_biotype "protein_coding"; exon_id "AFR92218-9";
1	ena	CDS	227669	227809	.	-	0	gene_id "CNAG_00081"; transcript_id "AFR92218"; exon_number "9"; gene_source "ena"; gene_biotype "protein_coding"; transcript_source "ena"; transcript_biotype "protein_coding"; protein_id "AFR92218"; protein_version "1";
1	ena	stop_codon	227666	227668	.	-	0	gene_id "CNAG_00081"; transcript_id "AFR92218"; exon_number "9"; gene_source "ena"; gene_biotype "protein_coding"; transcript_source "ena"; transcript_biotype "protein_coding";
1	ena	five_prime_utr	230932	230987	.	-	.	gene_id "CNAG_00081"; transcript_id "AFR92218"; gene_source "ena"; gene_biotype "protein_coding"; transcript_source "ena"; transcript_biotype "protein_coding";
1	ena	three_prime_utr	227600	227665	.	-	.	gene_id "CNAG_00081"; transcript_id "AFR92218"; gene_source "ena"; gene_biotype "protein_coding"; transcript_source "ena"; transcript_biotype "protein_coding";
1	ena	gene	231128	232389	.	+	.	gene_id "CNAG_00082"; gene_source "ena"; gene_biotype "protein_coding";
1	ena	transcript	231128	232389	.	+	.	gene_id "CNAG_00082"; transcript_id "AFR92219"; gene_source "ena"; gene_biotype "protein_coding"; transcript_source "ena"; transcript_biotype "protein_coding";
1	ena	exon	231128	231250	.	+	.	gene_id "CNAG_00082"; transcript_id "AFR92219"; exon_number "1"; gene_source "ena"; gene_biotype "protein_coding"; transcript_source "ena"; transcript_biotype "protein_coding"; exon_id "AFR92219-1";
1	ena	CDS	231172	231250	.	+	0	gene_id "CNAG_00082"; transcript_id "AFR92219"; exon_number "1"; gene_source "ena"; gene_biotype "protein_coding"; transcript_source "ena"; transcript_biotype "protein_coding"; protein_id "AFR92219"; protein_version "1";
1	ena	start_codon	231172	231174	.	+	0	gene_id "CNAG_00082"; transcript_id "AFR92219"; exon_number "1"; gene_source "ena"; gene_biotype "protein_coding"; transcript_source "ena"; transcript_biotype "protein_coding";
1	ena	exon	231305	231652	.	+	.	gene_id "CNAG_00082"; transcript_id "AFR92219"; exon_number "2"; gene_source "ena"; gene_biotype "protein_coding"; transcript_source "ena"; transcript_biotype "protein_coding"; exon_id "AFR92219-2";
1	ena	CDS	231305	231652	.	+	2	gene_id "CNAG_00082"; transcript_id "AFR92219"; exon_number "2"; gene_source "ena"; gene_biotype "protein_coding"; transcript_source "ena"; transcript_biotype "protein_coding"; protein_id "AFR92219"; protein_version "1";
1	ena	exon	231703	232389	.	+	.	gene_id "CNAG_00082"; transcript_id "AFR92219"; exon_number "3"; gene_source "ena"; gene_biotype "protein_coding"; transcript_source "ena"; transcript_biotype "protein_coding"; exon_id "AFR92219-3";
1	ena	CDS	231703	232271	.	+	2	gene_id "CNAG_00082"; transcript_id "AFR92219"; exon_number "3"; gene_source "ena"; gene_biotype "protein_coding"; transcript_source "ena"; transcript_biotype "protein_coding"; protein_id "AFR92219"; protein_version "1";
1	ena	five_prime_utr	231128	231171	.	+	.	gene_id "CNAG_00082"; transcript_id "AFR92219"; gene_source "ena"; gene_biotype "protein_coding"; transcript_source "ena"; transcript_biotype "protein_coding";
1	ena	three_prime_utr	232272	232389	.	+	.	gene_id "CNAG_00082"; transcript_id "AFR92219"; gene_source "ena"; gene_biotype "protein_coding"; transcript_source "ena"; transcript_biotype "protein_coding";
1	ena	gene	232292	235608	.	-	.	gene_id "CNAG_00083"; gene_source "ena"; gene_biotype "protein_coding";
1	ena	transcript	232292	235608	.	-	.	gene_id "CNAG_00083"; transcript_id "AFR92220"; gene_source "ena"; gene_biotype "protein_coding"; transcript_source "ena"; transcript_biotype "protein_coding";
1	ena	exon	235117	235608	.	-	.	gene_id "CNAG_00083"; transcript_id "AFR92220"; exon_number "1"; gene_source "ena"; gene_biotype "protein_coding"; transcript_source "ena"; transcript_biotype "protein_coding"; exon_id "AFR92220-1";
1	ena	CDS	235117	235528	.	-	0	gene_id "CNAG_00083"; transcript_id "AFR92220"; exon_number "1"; gene_source "ena"; gene_biotype "protein_coding"; transcript_source "ena"; transcript_biotype "protein_coding"; protein_id "AFR92220"; protein_version "1";
1	ena	start_codon	235526	235528	.	-	0	gene_id "CNAG_00083"; transcript_id "AFR92220"; exon_number "1"; gene_source "ena"; gene_biotype "protein_coding"; transcript_source "ena"; transcript_biotype "protein_coding";
1	ena	exon	232612	235064	.	-	.	gene_id "CNAG_00083"; transcript_id "AFR92220"; exon_number "2"; gene_source "ena"; gene_biotype "protein_coding"; transcript_source "ena"; transcript_biotype "protein_coding"; exon_id "AFR92220-2";
1	ena	CDS	232612	235064	.	-	2	gene_id "CNAG_00083"; transcript_id "AFR92220"; exon_number "2"; gene_source "ena"; gene_biotype "protein_coding"; transcript_source "ena"; transcript_biotype "protein_coding"; protein_id "AFR92220"; protein_version "1";
1	ena	exon	232292	232560	.	-	.	gene_id "CNAG_00083"; transcript_id "AFR92220"; exon_number "3"; gene_source "ena"; gene_biotype "protein_coding"; transcript_source "ena"; transcript_biotype "protein_coding"; exon_id "AFR92220-3";
1	ena	CDS	232495	232560	.	-	0	gene_id "CNAG_00083"; transcript_id "AFR92220"; exon_number "3"; gene_source "ena"; gene_biotype "protein_coding"; transcript_source "ena"; transcript_biotype "protein_coding"; protein_id "AFR92220"; protein_version "1";
1	ena	five_prime_utr	235529	235608	.	-	.	gene_id "CNAG_00083"; transcript_id "AFR92220"; gene_source "ena"; gene_biotype "protein_coding"; transcript_source "ena"; transcript_biotype "protein_coding";
1	ena	three_prime_utr	232292	232494	.	-	.	gene_id "CNAG_00083"; transcript_id "AFR92220"; gene_source "ena"; gene_biotype "protein_coding"; transcript_source "ena"; transcript_biotype "protein_coding";
1	ena	gene	235727	240205	.	+	.	gene_id "CNAG_00084"; gene_source "ena"; gene_biotype "protein_coding";
1	ena	transcript	235727	240205	.	+	.	gene_id "CNAG_00084"; transcript_id "AFR92221"; gene_source "ena"; gene_biotype "protein_coding"; transcript_source "ena"; transcript_biotype "protein_coding";
1	ena	exon	235727	236763	.	+	.	gene_id "CNAG_00084"; transcript_id "AFR92221"; exon_number "1"; gene_source "ena"; gene_biotype "protein_coding"; transcript_source "ena"; transcript_biotype "protein_coding"; exon_id "AFR92221-1";
1	ena	CDS	236469	236763	.	+	0	gene_id "CNAG_00084"; transcript_id "AFR92221"; exon_number "1"; gene_source "ena"; gene_biotype "protein_coding"; transcript_source "ena"; transcript_biotype "protein_coding"; protein_id "AFR92221"; protein_version "1";
1	ena	start_codon	236469	236471	.	+	0	gene_id "CNAG_00084"; transcript_id "AFR92221"; exon_number "1"; gene_source "ena"; gene_biotype "protein_coding"; transcript_source "ena"; transcript_biotype "protein_coding";
1	ena	exon	236873	236947	.	+	.	gene_id "CNAG_00084"; transcript_id "AFR92221"; exon_number "2"; gene_source "ena"; gene_biotype "protein_coding"; transcript_source "ena"; transcript_biotype "protein_coding"; exon_id "AFR92221-2";
1	ena	CDS	236873	236947	.	+	2	gene_id "CNAG_00084"; transcript_id "AFR92221"; exon_number "2"; gene_source "ena"; gene_biotype "protein_coding"; transcript_source "ena"; transcript_biotype "protein_coding"; protein_id "AFR92221"; protein_version "1";
1	ena	exon	237000	237132	.	+	.	gene_id "CNAG_00084"; transcript_id "AFR92221"; exon_number "3"; gene_source "ena"; gene_biotype "protein_coding"; transcript_source "ena"; transcript_biotype "protein_coding"; exon_id "AFR92221-3";
1	ena	CDS	237000	237132	.	+	2	gene_id "CNAG_00084"; transcript_id "AFR92221"; exon_number "3"; gene_source "ena"; gene_biotype "protein_coding"; transcript_source "ena"; transcript_biotype "protein_coding"; protein_id "AFR92221"; protein_version "1";
1	ena	exon	237181	237600	.	+	.	gene_id "CNAG_00084"; transcript_id "AFR92221"; exon_number "4"; gene_source "ena"; gene_biotype "protein_coding"; transcript_source "ena"; transcript_biotype "protein_coding"; exon_id "AFR92221-4";
1	ena	CDS	237181	237600	.	+	1	gene_id "CNAG_00084"; transcript_id "AFR92221"; exon_number "4"; gene_source "ena"; gene_biotype "protein_coding"; transcript_source "ena"; transcript_biotype "protein_coding"; protein_id "AFR92221"; protein_version "1";
1	ena	exon	237834	238015	.	+	.	gene_id "CNAG_00084"; transcript_id "AFR92221"; exon_number "5"; gene_source "ena"; gene_biotype "protein_coding"; transcript_source "ena"; transcript_biotype "protein_coding"; exon_id "AFR92221-5";
1	ena	CDS	237834	238015	.	+	1	gene_id "CNAG_00084"; transcript_id "AFR92221"; exon_number "5"; gene_source "ena"; gene_biotype "protein_coding"; transcript_source "ena"; transcript_biotype "protein_coding"; protein_id "AFR92221"; protein_version "1";
1	ena	exon	238067	238306	.	+	.	gene_id "CNAG_00084"; transcript_id "AFR92221"; exon_number "6"; gene_source "ena"; gene_biotype "protein_coding"; transcript_source "ena"; transcript_biotype "protein_coding"; exon_id "AFR92221-6";
1	ena	CDS	238067	238306	.	+	2	gene_id "CNAG_00084"; transcript_id "AFR92221"; exon_number "6"; gene_source "ena"; gene_biotype "protein_coding"; transcript_source "ena"; transcript_biotype "protein_coding"; protein_id "AFR92221"; protein_version "1";
1	ena	exon	238356	238413	.	+	.	gene_id "CNAG_00084"; transcript_id "AFR92221"; exon_number "7"; gene_source "ena"; gene_biotype "protein_coding"; transcript_source "ena"; transcript_biotype "protein_coding"; exon_id "AFR92221-7";
1	ena	CDS	238356	238413	.	+	2	gene_id "CNAG_00084"; transcript_id "AFR92221"; exon_number "7"; gene_source "ena"; gene_biotype "protein_coding"; transcript_source "ena"; transcript_biotype "protein_coding"; protein_id "AFR92221"; protein_version "1";
1	ena	exon	238465	240205	.	+	.	gene_id "CNAG_00084"; transcript_id "AFR92221"; exon_number "8"; gene_source "ena"; gene_biotype "protein_coding"; transcript_source "ena"; transcript_biotype "protein_coding"; exon_id "AFR92221-8";
1	ena	CDS	238465	239635	.	+	1	gene_id "CNAG_00084"; transcript_id "AFR92221"; exon_number "8"; gene_source "ena"; gene_biotype "protein_coding"; transcript_source "ena"; transcript_biotype "protein_coding"; protein_id "AFR92221"; protein_version "1";
1	ena	stop_codon	239636	239638	.	+	0	gene_id "CNAG_00084"; transcript_id "AFR92221"; exon_number "8"; gene_source "ena"; gene_biotype "protein_coding"; transcript_source "ena"; transcript_biotype "protein_coding";
1	ena	five_prime_utr	235727	236468	.	+	.	gene_id "CNAG_00084"; transcript_id "AFR92221"; gene_source "ena"; gene_biotype "protein_coding"; transcript_source "ena"; transcript_biotype "protein_coding";
1	ena	three_prime_utr	239639	240205	.	+	.	gene_id "CNAG_00084"; transcript_id "AFR92221"; gene_source "ena"; gene_biotype "protein_coding"; transcript_source "ena"; transcript_biotype "protein_coding";
1	ena	gene	239749	240880	.	-	.	gene_id "CNAG_00085"; gene_source "ena"; gene_biotype "protein_coding";
1	ena	transcript	239749	240880	.	-	.	gene_id "CNAG_00085"; transcript_id "AFR92222"; gene_source "ena"; gene_biotype "protein_coding"; transcript_source "ena"; transcript_biotype "protein_coding";
1	ena	exon	240799	240880	.	-	.	gene_id "CNAG_00085"; transcript_id "AFR92222"; exon_number "1"; gene_source "ena"; gene_biotype "protein_coding"; transcript_source "ena"; transcript_biotype "protein_coding"; exon_id "AFR92222-1";
1	ena	CDS	240799	240801	.	-	0	gene_id "CNAG_00085"; transcript_id "AFR92222"; exon_number "1"; gene_source "ena"; gene_biotype "protein_coding"; transcript_source "ena"; transcript_biotype "protein_coding"; protein_id "AFR92222"; protein_version "1";
1	ena	start_codon	240799	240801	.	-	0	gene_id "CNAG_00085"; transcript_id "AFR92222"; exon_number "1"; gene_source "ena"; gene_biotype "protein_coding"; transcript_source "ena"; transcript_biotype "protein_coding";
1	ena	exon	240740	240745	.	-	.	gene_id "CNAG_00085"; transcript_id "AFR92222"; exon_number "2"; gene_source "ena"; gene_biotype "protein_coding"; transcript_source "ena"; transcript_biotype "protein_coding"; exon_id "AFR92222-2";
1	ena	CDS	240740	240745	.	-	0	gene_id "CNAG_00085"; transcript_id "AFR92222"; exon_number "2"; gene_source "ena"; gene_biotype "protein_coding"; transcript_source "ena"; transcript_biotype "protein_coding"; protein_id "AFR92222"; protein_version "1";
1	ena	exon	240590	240689	.	-	.	gene_id "CNAG_00085"; transcript_id "AFR92222"; exon_number "3"; gene_source "ena"; gene_biotype "protein_coding"; transcript_source "ena"; transcript_biotype "protein_coding"; exon_id "AFR92222-3";
1	ena	CDS	240590	240689	.	-	0	gene_id "CNAG_00085"; transcript_id "AFR92222"; exon_number "3"; gene_source "ena"; gene_biotype "protein_coding"; transcript_source "ena"; transcript_biotype "protein_coding"; protein_id "AFR92222"; protein_version "1";
1	ena	exon	240401	240475	.	-	.	gene_id "CNAG_00085"; transcript_id "AFR92222"; exon_number "4"; gene_source "ena"; gene_biotype "protein_coding"; transcript_source "ena"; transcript_biotype "protein_coding"; exon_id "AFR92222-4";
1	ena	CDS	240401	240475	.	-	2	gene_id "CNAG_00085"; transcript_id "AFR92222"; exon_number "4"; gene_source "ena"; gene_biotype "protein_coding"; transcript_source "ena"; transcript_biotype "protein_coding"; protein_id "AFR92222"; protein_version "1";
1	ena	exon	240070	240337	.	-	.	gene_id "CNAG_00085"; transcript_id "AFR92222"; exon_number "5"; gene_source "ena"; gene_biotype "protein_coding"; transcript_source "ena"; transcript_biotype "protein_coding"; exon_id "AFR92222-5";
1	ena	CDS	240070	240337	.	-	2	gene_id "CNAG_00085"; transcript_id "AFR92222"; exon_number "5"; gene_source "ena"; gene_biotype "protein_coding"; transcript_source "ena"; transcript_biotype "protein_coding"; protein_id "AFR92222"; protein_version "1";
1	ena	exon	239749	240021	.	-	.	gene_id "CNAG_00085"; transcript_id "AFR92222"; exon_number "6"; gene_source "ena"; gene_biotype "protein_coding"; transcript_source "ena"; transcript_biotype "protein_coding"; exon_id "AFR92222-6";
1	ena	CDS	239847	240021	.	-	1	gene_id "CNAG_00085"; transcript_id "AFR92222"; exon_number "6"; gene_source "ena"; gene_biotype "protein_coding"; transcript_source "ena"; transcript_biotype "protein_coding"; protein_id "AFR92222"; protein_version "1";
1	ena	five_prime_utr	240802	240880	.	-	.	gene_id "CNAG_00085"; transcript_id "AFR92222"; gene_source "ena"; gene_biotype "protein_coding"; transcript_source "ena"; transcript_biotype "protein_coding";
1	ena	three_prime_utr	239749	239846	.	-	.	gene_id "CNAG_00085"; transcript_id "AFR92222"; gene_source "ena"; gene_biotype "protein_coding"; transcript_source "ena"; transcript_biotype "protein_coding";
1	ena	gene	241037	243443	.	+	.	gene_id "CNAG_00086"; gene_source "ena"; gene_biotype "protein_coding";
1	ena	transcript	241037	243443	.	+	.	gene_id "CNAG_00086"; transcript_id "AFR92223"; gene_source "ena"; gene_biotype "protein_coding"; transcript_source "ena"; transcript_biotype "protein_coding";
1	ena	exon	241037	241549	.	+	.	gene_id "CNAG_00086"; transcript_id "AFR92223"; exon_number "1"; gene_source "ena"; gene_biotype "protein_coding"; transcript_source "ena"; transcript_biotype "protein_coding"; exon_id "AFR92223-1";
1	ena	CDS	241070	241549	.	+	0	gene_id "CNAG_00086"; transcript_id "AFR92223"; exon_number "1"; gene_source "ena"; gene_biotype "protein_coding"; transcript_source "ena"; transcript_biotype "protein_coding"; protein_id "AFR92223"; protein_version "1";
1	ena	start_codon	241070	241072	.	+	0	gene_id "CNAG_00086"; transcript_id "AFR92223"; exon_number "1"; gene_source "ena"; gene_biotype "protein_coding"; transcript_source "ena"; transcript_biotype "protein_coding";
1	ena	exon	241600	242369	.	+	.	gene_id "CNAG_00086"; transcript_id "AFR92223"; exon_number "2"; gene_source "ena"; gene_biotype "protein_coding"; transcript_source "ena"; transcript_biotype "protein_coding"; exon_id "AFR92223-2";
1	ena	CDS	241600	242369	.	+	0	gene_id "CNAG_00086"; transcript_id "AFR92223"; exon_number "2"; gene_source "ena"; gene_biotype "protein_coding"; transcript_source "ena"; transcript_biotype "protein_coding"; protein_id "AFR92223"; protein_version "1";
1	ena	exon	242425	242599	.	+	.	gene_id "CNAG_00086"; transcript_id "AFR92223"; exon_number "3"; gene_source "ena"; gene_biotype "protein_coding"; transcript_source "ena"; transcript_biotype "protein_coding"; exon_id "AFR92223-3";
1	ena	CDS	242425	242599	.	+	1	gene_id "CNAG_00086"; transcript_id "AFR92223"; exon_number "3"; gene_source "ena"; gene_biotype "protein_coding"; transcript_source "ena"; transcript_biotype "protein_coding"; protein_id "AFR92223"; protein_version "1";
1	ena	exon	242651	242868	.	+	.	gene_id "CNAG_00086"; transcript_id "AFR92223"; exon_number "4"; gene_source "ena"; gene_biotype "protein_coding"; transcript_source "ena"; transcript_biotype "protein_coding"; exon_id "AFR92223-4";
1	ena	CDS	242651	242868	.	+	0	gene_id "CNAG_00086"; transcript_id "AFR92223"; exon_number "4"; gene_source "ena"; gene_biotype "protein_coding"; transcript_source "ena"; transcript_biotype "protein_coding"; protein_id "AFR92223"; protein_version "1";
1	ena	exon	242918	243443	.	+	.	gene_id "CNAG_00086"; transcript_id "AFR92223"; exon_number "5"; gene_source "ena"; gene_biotype "protein_coding"; transcript_source "ena"; transcript_biotype "protein_coding"; exon_id "AFR92223-5";
1	ena	CDS	242918	243338	.	+	1	gene_id "CNAG_00086"; transcript_id "AFR92223"; exon_number "5"; gene_source "ena"; gene_biotype "protein_coding"; transcript_source "ena"; transcript_biotype "protein_coding"; protein_id "AFR92223"; protein_version "1";
1	ena	stop_codon	243339	243341	.	+	0	gene_id "CNAG_00086"; transcript_id "AFR92223"; exon_number "5"; gene_source "ena"; gene_biotype "protein_coding"; transcript_source "ena"; transcript_biotype "protein_coding";
1	ena	five_prime_utr	241037	241069	.	+	.	gene_id "CNAG_00086"; transcript_id "AFR92223"; gene_source "ena"; gene_biotype "protein_coding"; transcript_source "ena"; transcript_biotype "protein_coding";
1	ena	three_prime_utr	243342	243443	.	+	.	gene_id "CNAG_00086"; transcript_id "AFR92223"; gene_source "ena"; gene_biotype "protein_coding"; transcript_source "ena"; transcript_biotype "protein_coding";
1	ena	gene	243385	246325	.	-	.	gene_id "CNAG_00087"; gene_source "ena"; gene_biotype "protein_coding";
1	ena	transcript	243385	246325	.	-	.	gene_id "CNAG_00087"; transcript_id "AFR92224"; gene_source "ena"; gene_biotype "protein_coding"; transcript_source "ena"; transcript_biotype "protein_coding";
1	ena	exon	245744	246325	.	-	.	gene_id "CNAG_00087"; transcript_id "AFR92224"; exon_number "1"; gene_source "ena"; gene_biotype "protein_coding"; transcript_source "ena"; transcript_biotype "protein_coding"; exon_id "AFR92224-1";
1	ena	CDS	245744	246004	.	-	0	gene_id "CNAG_00087"; transcript_id "AFR92224"; exon_number "1"; gene_source "ena"; gene_biotype "protein_coding"; transcript_source "ena"; transcript_biotype "protein_coding"; protein_id "AFR92224"; protein_version "1";
1	ena	start_codon	246002	246004	.	-	0	gene_id "CNAG_00087"; transcript_id "AFR92224"; exon_number "1"; gene_source "ena"; gene_biotype "protein_coding"; transcript_source "ena"; transcript_biotype "protein_coding";
1	ena	exon	243385	245686	.	-	.	gene_id "CNAG_00087"; transcript_id "AFR92224"; exon_number "2"; gene_source "ena"; gene_biotype "protein_coding"; transcript_source "ena"; transcript_biotype "protein_coding"; exon_id "AFR92224-2";
1	ena	CDS	243899	245686	.	-	0	gene_id "CNAG_00087"; transcript_id "AFR92224"; exon_number "2"; gene_source "ena"; gene_biotype "protein_coding"; transcript_source "ena"; transcript_biotype "protein_coding"; protein_id "AFR92224"; protein_version "1";
1	ena	five_prime_utr	246005	246325	.	-	.	gene_id "CNAG_00087"; transcript_id "AFR92224"; gene_source "ena"; gene_biotype "protein_coding"; transcript_source "ena"; transcript_biotype "protein_coding";
1	ena	three_prime_utr	243385	243898	.	-	.	gene_id "CNAG_00087"; transcript_id "AFR92224"; gene_source "ena"; gene_biotype "protein_coding"; transcript_source "ena"; transcript_biotype "protein_coding";
1	ena	gene	246364	248042	.	-	.	gene_id "CNAG_00088"; gene_source "ena"; gene_biotype "protein_coding";
1	ena	transcript	246364	248042	.	-	.	gene_id "CNAG_00088"; transcript_id "AFR92225"; gene_source "ena"; gene_biotype "protein_coding"; transcript_source "ena"; transcript_biotype "protein_coding";
1	ena	exon	247934	248042	.	-	.	gene_id "CNAG_00088"; transcript_id "AFR92225"; exon_number "1"; gene_source "ena"; gene_biotype "protein_coding"; transcript_source "ena"; transcript_biotype "protein_coding"; exon_id "AFR92225-1";
1	ena	CDS	247934	247967	.	-	0	gene_id "CNAG_00088"; transcript_id "AFR92225"; exon_number "1"; gene_source "ena"; gene_biotype "protein_coding"; transcript_source "ena"; transcript_biotype "protein_coding"; protein_id "AFR92225"; protein_version "1";
1	ena	start_codon	247965	247967	.	-	0	gene_id "CNAG_00088"; transcript_id "AFR92225"; exon_number "1"; gene_source "ena"; gene_biotype "protein_coding"; transcript_source "ena"; transcript_biotype "protein_coding";
1	ena	exon	247690	247793	.	-	.	gene_id "CNAG_00088"; transcript_id "AFR92225"; exon_number "2"; gene_source "ena"; gene_biotype "protein_coding"; transcript_source "ena"; transcript_biotype "protein_coding"; exon_id "AFR92225-2";
1	ena	CDS	247690	247793	.	-	2	gene_id "CNAG_00088"; transcript_id "AFR92225"; exon_number "2"; gene_source "ena"; gene_biotype "protein_coding"; transcript_source "ena"; transcript_biotype "protein_coding"; protein_id "AFR92225"; protein_version "1";
1	ena	exon	247487	247592	.	-	.	gene_id "CNAG_00088"; transcript_id "AFR92225"; exon_number "3"; gene_source "ena"; gene_biotype "protein_coding"; transcript_source "ena"; transcript_biotype "protein_coding"; exon_id "AFR92225-3";
1	ena	CDS	247487	247592	.	-	0	gene_id "CNAG_00088"; transcript_id "AFR92225"; exon_number "3"; gene_source "ena"; gene_biotype "protein_coding"; transcript_source "ena"; transcript_biotype "protein_coding"; protein_id "AFR92225"; protein_version "1";
1	ena	exon	247340	247427	.	-	.	gene_id "CNAG_00088"; transcript_id "AFR92225"; exon_number "4"; gene_source "ena"; gene_biotype "protein_coding"; transcript_source "ena"; transcript_biotype "protein_coding"; exon_id "AFR92225-4";
1	ena	CDS	247340	247427	.	-	2	gene_id "CNAG_00088"; transcript_id "AFR92225"; exon_number "4"; gene_source "ena"; gene_biotype "protein_coding"; transcript_source "ena"; transcript_biotype "protein_coding"; protein_id "AFR92225"; protein_version "1";
1	ena	exon	247215	247282	.	-	.	gene_id "CNAG_00088"; transcript_id "AFR92225"; exon_number "5"; gene_source "ena"; gene_biotype "protein_coding"; transcript_source "ena"; transcript_biotype "protein_coding"; exon_id "AFR92225-5";
1	ena	CDS	247215	247282	.	-	1	gene_id "CNAG_00088"; transcript_id "AFR92225"; exon_number "5"; gene_source "ena"; gene_biotype "protein_coding"; transcript_source "ena"; transcript_biotype "protein_coding"; protein_id "AFR92225"; protein_version "1";
1	ena	exon	247053	247156	.	-	.	gene_id "CNAG_00088"; transcript_id "AFR92225"; exon_number "6"; gene_source "ena"; gene_biotype "protein_coding"; transcript_source "ena"; transcript_biotype "protein_coding"; exon_id "AFR92225-6";
1	ena	CDS	247053	247156	.	-	2	gene_id "CNAG_00088"; transcript_id "AFR92225"; exon_number "6"; gene_source "ena"; gene_biotype "protein_coding"; transcript_source "ena"; transcript_biotype "protein_coding"; protein_id "AFR92225"; protein_version "1";
1	ena	exon	246991	247001	.	-	.	gene_id "CNAG_00088"; transcript_id "AFR92225"; exon_number "7"; gene_source "ena"; gene_biotype "protein_coding"; transcript_source "ena"; transcript_biotype "protein_coding"; exon_id "AFR92225-7";
1	ena	CDS	246991	247001	.	-	0	gene_id "CNAG_00088"; transcript_id "AFR92225"; exon_number "7"; gene_source "ena"; gene_biotype "protein_coding"; transcript_source "ena"; transcript_biotype "protein_coding"; protein_id "AFR92225"; protein_version "1";
1	ena	exon	246708	246928	.	-	.	gene_id "CNAG_00088"; transcript_id "AFR92225"; exon_number "8"; gene_source "ena"; gene_biotype "protein_coding"; transcript_source "ena"; transcript_biotype "protein_coding"; exon_id "AFR92225-8";
1	ena	CDS	246708	246928	.	-	1	gene_id "CNAG_00088"; transcript_id "AFR92225"; exon_number "8"; gene_source "ena"; gene_biotype "protein_coding"; transcript_source "ena"; transcript_biotype "protein_coding"; protein_id "AFR92225"; protein_version "1";
1	ena	exon	246364	246648	.	-	.	gene_id "CNAG_00088"; transcript_id "AFR92225"; exon_number "9"; gene_source "ena"; gene_biotype "protein_coding"; transcript_source "ena"; transcript_biotype "protein_coding"; exon_id "AFR92225-9";
1	ena	CDS	246560	246648	.	-	2	gene_id "CNAG_00088"; transcript_id "AFR92225"; exon_number "9"; gene_source "ena"; gene_biotype "protein_coding"; transcript_source "ena"; transcript_biotype "protein_coding"; protein_id "AFR92225"; protein_version "1";
1	ena	five_prime_utr	247968	248042	.	-	.	gene_id "CNAG_00088"; transcript_id "AFR92225"; gene_source "ena"; gene_biotype "protein_coding"; transcript_source "ena"; transcript_biotype "protein_coding";
1	ena	three_prime_utr	246364	246559	.	-	.	gene_id "CNAG_00088"; transcript_id "AFR92225"; gene_source "ena"; gene_biotype "protein_coding"; transcript_source "ena"; transcript_biotype "protein_coding";
1	ena	gene	248164	249658	.	-	.	gene_id "CNAG_00089"; gene_source "ena"; gene_biotype "protein_coding";
1	ena	transcript	248164	249658	.	-	.	gene_id "CNAG_00089"; transcript_id "AFR92226"; gene_source "ena"; gene_biotype "protein_coding"; transcript_source "ena"; transcript_biotype "protein_coding";
1	ena	exon	249370	249658	.	-	.	gene_id "CNAG_00089"; transcript_id "AFR92226"; exon_number "1"; gene_source "ena"; gene_biotype "protein_coding"; transcript_source "ena"; transcript_biotype "protein_coding"; exon_id "AFR92226-1";
1	ena	CDS	249370	249563	.	-	0	gene_id "CNAG_00089"; transcript_id "AFR92226"; exon_number "1"; gene_source "ena"; gene_biotype "protein_coding"; transcript_source "ena"; transcript_biotype "protein_coding"; protein_id "AFR92226"; protein_version "1";
1	ena	start_codon	249561	249563	.	-	0	gene_id "CNAG_00089"; transcript_id "AFR92226"; exon_number "1"; gene_source "ena"; gene_biotype "protein_coding"; transcript_source "ena"; transcript_biotype "protein_coding";
1	ena	exon	249219	249320	.	-	.	gene_id "CNAG_00089"; transcript_id "AFR92226"; exon_number "2"; gene_source "ena"; gene_biotype "protein_coding"; transcript_source "ena"; transcript_biotype "protein_coding"; exon_id "AFR92226-2";
1	ena	CDS	249219	249320	.	-	1	gene_id "CNAG_00089"; transcript_id "AFR92226"; exon_number "2"; gene_source "ena"; gene_biotype "protein_coding"; transcript_source "ena"; transcript_biotype "protein_coding"; protein_id "AFR92226"; protein_version "1";
1	ena	exon	248950	249142	.	-	.	gene_id "CNAG_00089"; transcript_id "AFR92226"; exon_number "3"; gene_source "ena"; gene_biotype "protein_coding"; transcript_source "ena"; transcript_biotype "protein_coding"; exon_id "AFR92226-3";
1	ena	CDS	248950	249142	.	-	1	gene_id "CNAG_00089"; transcript_id "AFR92226"; exon_number "3"; gene_source "ena"; gene_biotype "protein_coding"; transcript_source "ena"; transcript_biotype "protein_coding"; protein_id "AFR92226"; protein_version "1";
1	ena	exon	248810	248887	.	-	.	gene_id "CNAG_00089"; transcript_id "AFR92226"; exon_number "4"; gene_source "ena"; gene_biotype "protein_coding"; transcript_source "ena"; transcript_biotype "protein_coding"; exon_id "AFR92226-4";
1	ena	CDS	248810	248887	.	-	0	gene_id "CNAG_00089"; transcript_id "AFR92226"; exon_number "4"; gene_source "ena"; gene_biotype "protein_coding"; transcript_source "ena"; transcript_biotype "protein_coding"; protein_id "AFR92226"; protein_version "1";
1	ena	exon	248544	248756	.	-	.	gene_id "CNAG_00089"; transcript_id "AFR92226"; exon_number "5"; gene_source "ena"; gene_biotype "protein_coding"; transcript_source "ena"; transcript_biotype "protein_coding"; exon_id "AFR92226-5";
1	ena	CDS	248544	248756	.	-	0	gene_id "CNAG_00089"; transcript_id "AFR92226"; exon_number "5"; gene_source "ena"; gene_biotype "protein_coding"; transcript_source "ena"; transcript_biotype "protein_coding"; protein_id "AFR92226"; protein_version "1";
1	ena	exon	248164	248490	.	-	.	gene_id "CNAG_00089"; transcript_id "AFR92226"; exon_number "6"; gene_source "ena"; gene_biotype "protein_coding"; transcript_source "ena"; transcript_biotype "protein_coding"; exon_id "AFR92226-6";
1	ena	CDS	248278	248490	.	-	0	gene_id "CNAG_00089"; transcript_id "AFR92226"; exon_number "6"; gene_source "ena"; gene_biotype "protein_coding"; transcript_source "ena"; transcript_biotype "protein_coding"; protein_id "AFR92226"; protein_version "1";
1	ena	stop_codon	248275	248277	.	-	0	gene_id "CNAG_00089"; transcript_id "AFR92226"; exon_number "6"; gene_source "ena"; gene_biotype "protein_coding"; transcript_source "ena"; transcript_biotype "protein_coding";
1	ena	five_prime_utr	249564	249658	.	-	.	gene_id "CNAG_00089"; transcript_id "AFR92226"; gene_source "ena"; gene_biotype "protein_coding"; transcript_source "ena"; transcript_biotype "protein_coding";
1	ena	three_prime_utr	248164	248274	.	-	.	gene_id "CNAG_00089"; transcript_id "AFR92226"; gene_source "ena"; gene_biotype "protein_coding"; transcript_source "ena"; transcript_biotype "protein_coding";
1	ena	gene	249808	251998	.	+	.	gene_id "CNAG_00090"; gene_source "ena"; gene_biotype "protein_coding";
1	ena	transcript	249808	251998	.	+	.	gene_id "CNAG_00090"; transcript_id "AFR92227"; gene_source "ena"; gene_biotype "protein_coding"; transcript_source "ena"; transcript_biotype "protein_coding";
1	ena	exon	249808	249958	.	+	.	gene_id "CNAG_00090"; transcript_id "AFR92227"; exon_number "1"; gene_source "ena"; gene_biotype "protein_coding"; transcript_source "ena"; transcript_biotype "protein_coding"; exon_id "AGV15268-1";
[truncated: 142,155 more rows]
